# Supplementary material
Source: PubMed Central journal article supplement (PMC2702751)

# MS<sup>n</sup> Spectra of Oxysterols from Foetal Mouse Brain

| Identified Structure after Treatment with Cholesterol Oxidase | [M] <sup>+</sup> of GP <sup>a</sup><br>m/z | Ctx <sup>a</sup> |           | Sc <sup>a</sup> |           | Inferred Structure prior to Treatment with Cholesterol Oxidase        | Inferred Compound Trivial Name                                                           | Figure          |                 |
|---------------------------------------------------------------|--------------------------------------------|------------------|-----------|-----------------|-----------|-----------------------------------------------------------------------|------------------------------------------------------------------------------------------|-----------------|-----------------|
|                                                               |                                            | μg/g             | Rt/min    | μg/g            | Rt/min    |                                                                       |                                                                                          | MS <sup>2</sup> | MS <sup>3</sup> |
| C-4,24-diene-3-one                                            | 516.3948                                   | NM               | 10.53     | NM              | 10.52     | C-5,24-diene-3β-ol                                                    | Desmosterol                                                                              | S4a             | S4b             |
| C-4,7(or8)-diene-3-one                                        | 516.3948                                   | NM               | 11.00     | ND              |           | C-5,7(or 8)-diene-3β-ol                                               | 7(or 8)-Dehydrocholesterol <sup>b</sup>                                                  | S4c             | S4d             |
| C-4-ene-3-one                                                 | 518.4105                                   | NM               | 11.43     | NM              | 11.43     | C-5-ene-3β-ol                                                         | Cholesterol                                                                              | S4e             | S4f             |
| 24-Me-C-4-ene-3-one                                           | 532.4261                                   | NM               | 12.13     | NM              | 12.09     | 24-Me-C-5-ene-3β-ol                                                   | Campesterol <sup>c</sup>                                                                 | S4g             | S4h             |
| 24-Et-C-4-ene-3-one                                           | 546.4418                                   | NM               | 12.84     | NM              | 12.76     | 24-Et-C-5-ene-3β-ol                                                   | Sitosterol <sup>c,d</sup>                                                                | --              | --              |
| C-X,Y,Z-triene-x-ol-y-one                                     | 530.3741                                   | 0.008            | 9.1       | ND              |           | C-X,Y,Z-triene-3β,x-diol <sup>e</sup>                                 | Unknown <sup>e</sup>                                                                     | --              | --              |
| C-4-ene-24S,25-epoxide-3-one                                  | 532.3898                                   | 0.043            | 6.63/6.86 | 0.022           | 6.66/6.85 | C-5-ene-3β-ol-24S,25-epoxide                                          | 24S,25-Epoxycholesterol                                                                  | S4i             | S4j             |
| C-4-ene-24-ol,25-OMe-3-one <sup>f</sup>                       | 564.416                                    | 0.122            | 6.05/6.42 | 0.069           | 6.06/6.43 | C-5-ene-3β-ol-24S,25-epoxide                                          | 24S,25-Epoxycholesterol                                                                  | S4k             | S4L             |
|                                                               |                                            | <b>0.165</b>     |           | <b>0.091</b>    |           | <b>C-5-ene-3β-ol-24S,25-epoxide</b>                                   | <b>24S,25-Epoxycholesterol</b>                                                           |                 |                 |
| C-4-ene-3,24-dione                                            | 532.3898                                   | 0.093            | 7.35      | 0.013           | 7.38      | C-5-ene-3β-ol-24-one                                                  | 24-Oxocholesterol                                                                        | S4m             | S4n             |
| C-4-ene-3,6-dione                                             | 532.3898                                   | 0.185            | 9.76      | 0.019           | 9.94      | C-4-ene-3,6-dione <sup>g</sup>                                        | 6-Oxocholestenone <sup>g</sup>                                                           | S4o             | S4p             |
| C-4-ene-22R-ol-3-one                                          | 534.4054                                   | 0.004            | 6.14      | 0.002           | 6.17      | C-5-ene-3β,22R-diol                                                   | 22R-Hydroxycholesterol                                                                   | S4q             | S4r             |
| C-4-ene-24S-ol-3-one                                          | 534.4054                                   | 0.026            | 7.17/7.55 | 0.013           | 7.16/7.56 | C-5-ene-3β,24S-diol                                                   | 24S-Hydroxycholesterol                                                                   | S4s             | S4t             |
| C-4-ene-25-ol-3-one                                           | 534.4054                                   | 0.016            | 7.39      | 0.012           | 7.39      | C-5-ene-3β,25-diol                                                    | 25-Hydroxycholesterol                                                                    | S4u             | S4v             |
| C-4-ene-27-ol-3-one                                           | 534.4054                                   | 0.011            | 8.45/8.83 | 0.006           | 8.45/8.85 | C-5-ene-3β,27-diol                                                    | 27-Hydroxycholesterol                                                                    | S4w             | S4x             |
| C-4-ene-7β-ol-3-one                                           | 534.4054                                   | 0.052            | 9.08/9.48 | 0.053           | 9.11/9.5  | C-5-ene-3β,7β-diol                                                    | 7β-Hydroxycholesterol                                                                    | S4y             | S4z             |
| C-4-ene-7α-ol-3-one                                           | 534.4054                                   | 0.055            | 9.61      | 0.067           | 9.59      | C-5-ene-3β,7α-diol                                                    | 7α-Hydroxycholesterol <sup>h</sup>                                                       | S4aa            | S4ab            |
| C-7-ene-x-ol-3-one                                            | 534.4054                                   | 0.152            | 9.27/9.78 | 0.103           | 9.26/9.76 | C-7-ene-3β,x-diol                                                     | Hydroxylathosterol                                                                       | S4ac            | S4ad            |
| C-4-ene-6β-ol-3-one                                           | 534.4054                                   | 0.568            | 9.89      | 0.109           | 9.89      | C-4-ene-6β-ol-3-one/C-3β,5α,6β-triol/C-3β-ol-5,6-epoxide <sup>i</sup> | 6β-hydroxycholest-4-en-3-one/cholestane-3β,5α,6β-triol/5,6-epoxycholesterol <sup>i</sup> | S4ae            | S4af            |

|                               |          |       |           |       |           |                                                  |                            |      |      |
|-------------------------------|----------|-------|-----------|-------|-----------|--------------------------------------------------|----------------------------|------|------|
| C-X,Y,Z-triene-x,y-diol-z-one | 546.369  | 0.009 | 8.34      | ND    |           | C-X,Y,Z-triene-3 $\beta$ ,x,y-triol <sup>l</sup> | Unknown <sup>j</sup>       |      |      |
| C-X,Y,Z-triene-x,y-diol-z-one | 546.369  | 0.009 | 8.7       | 0.002 | 8.71      | C-X,Y,Z-triene-3b,x,y-triol <sup>l</sup>         | Unknown <sup>j</sup>       |      |      |
| C-X,Y,Z-triene-x,y-diol-z-one | 546.369  | 0.026 | 9.29      | ND    |           | C-X,Y,Z-triene-3 $\beta$ ,x,y-triol <sup>l</sup> | Unknown <sup>j</sup>       |      |      |
| C-X,Y-diene-x,y-diol-z-one    | 548.3847 | 0.004 | 5.45      | ND    |           | C-X,Y-diene-3 $\beta$ ,x,y-triol <sup>k</sup>    | Unknown <sup>k</sup>       |      |      |
| C-X,Y-diene-x,y-diol-z-one    | 548.3847 | ND    |           | 0.001 | 7.31      | C-X,Y-diene-3 $\beta$ ,x,y-triol <sup>k</sup>    | Unknown <sup>k</sup>       |      |      |
| C-X,Y-diene-x,y-diol-z-one    | 548.3847 | 0.028 | 9.78      | 0.007 | 9.76      | C-X,Y-diene-3 $\beta$ ,x,y-triol <sup>k</sup>    | Unknown <sup>k</sup>       | S4ag | S4ah |
| C-X,Y-diene-x,y-diol-z-one    | 548.3847 | 0.009 | 10.05     | 0.002 | 10.07     | C-X,Y-diene-3 $\beta$ ,x,y-triol <sup>k</sup>    | Unknown <sup>k</sup>       | S4ai | S4aj |
| C-4-ene-24,25-diol-3-one      | 550.4003 | 0.070 | 4.42/4.95 | 0.038 | 4.42/4.98 | C-5-ene-3 $\beta$ ,24,25-triol                   | 24,25-Dihydroxycholesterol | S4ak | S4aL |
| C-4-ene-24,27-diol-3-one      | 550.4003 | 0.007 | 4.83      | 0.006 | 4.85      | C-5-ene-3 $\beta$ ,24,27-triol                   | 24,27-Dihydroxycholesterol | S4am | S4an |
| C-x-ol-y,z-dione              | 550.4003 | 0.017 | 9.08      | 0.041 | 9.11      | C-3 $\beta$ ,x-diol-y-one <sup>L</sup>           | Unknown <sup>L</sup>       | S4ao | S4ap |
| C-x,y-diol-z-one              | 552.4160 | 0.002 | 5.67      | 0.001 | 5.68      | C-3 $\beta$ ,x,y-triol                           | Unknown                    |      |      |
| C-x,y-diol-z-one              | 552.4160 | 0.018 | 9.44/9.89 | 0.002 | 9.47      | C-3 $\beta$ ,x,y-triol                           | Unknown                    | S4aq | S4ar |
| aldol                         | 552.4160 | 0.066 | 9.59      | 0.075 | 9.59      | aldol <sup>m</sup>                               | aldol <sup>m</sup>         | S4as |      |

C = cholestane; NM = not measured; Rt = retention time; ND = not detected; No reference = no authentic standard available

<sup>a</sup> Data for GP derivatives

<sup>b</sup> 7- and 8-dehydrocholesterol are not resolved

<sup>c</sup> Possibly a contaminant

<sup>d</sup> Identification based on exact mass and isotopic pattern only

<sup>e</sup> Alternatively C-X,Y-dien-3 $\beta$ -ol-x-one

<sup>f</sup> Alternatively C-4-ene-25-ol,24-OMe-3-one, methanolysis product of C-4-ene-24S,25-epoxide-3-one

<sup>g</sup> C-4-ene-3,6-dione reacts with GP reagent without oxidation by cholesterol oxidase

<sup>h</sup> Formed enzymatically by CYP7A1 and/or by autoxidation

<sup>i</sup> C-4-ene-6 $\beta$ -ol-3-one can be formed from C-3 $\beta$ ,5 $\alpha$ ,6 $\beta$ -triol and C-3 $\beta$ -ol-5,6-epoxides during the cholesterol oxidase/GP derivatisation reaction

<sup>j</sup> Alternatively C-X,Y-diene-3 $\beta$ ,x-diol-y-one

<sup>k</sup> Alternatively C-X-ene-3 $\beta$ ,x-diol-y-one

<sup>l</sup> Alternatively C-X-ene-3 $\beta$ ,x,y-triol

<sup>m</sup> 3 $\beta$ ,5 $\beta$ -dihydroxy-B-norcholestane-6 $\beta$ -carboxyaldehyde (aldol) reacts with GP reagent without oxidation by cholesterol oxidase

# MS<sup>2</sup> and MS<sup>3</sup> Spectra of Oxysterols

- Upper panels display spectra of oxidised/derivatised oxysterols isolated from foetal mouse brain cortex
- Lower panels display spectra of authentic standards

**Fig. S4a**

C<sup>4,24</sup>-3-one 3-GP

CTX\_UFR2\_FR1\_2

30/06/2006 18:49:40

CTX\_UFR2\_FR1\_2 #1310 RT: 10.57 AV: 1 NL: 3.04E5  
F: ITMS + c ESI d Full ms2 516.40@cid35.00 [130.00-530.00]

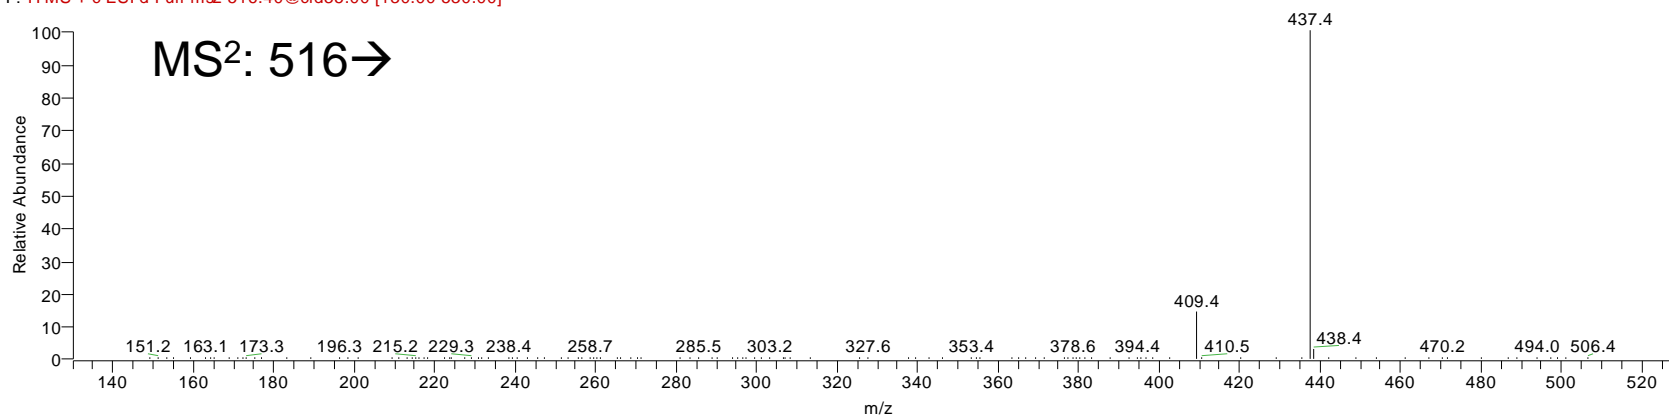

2 #1287 RT: 10.76 AV: 1 NL: 3.95E5  
F: ITMS + c ESI d Full ms2 516.40@cid35.00 [130.00-530.00]

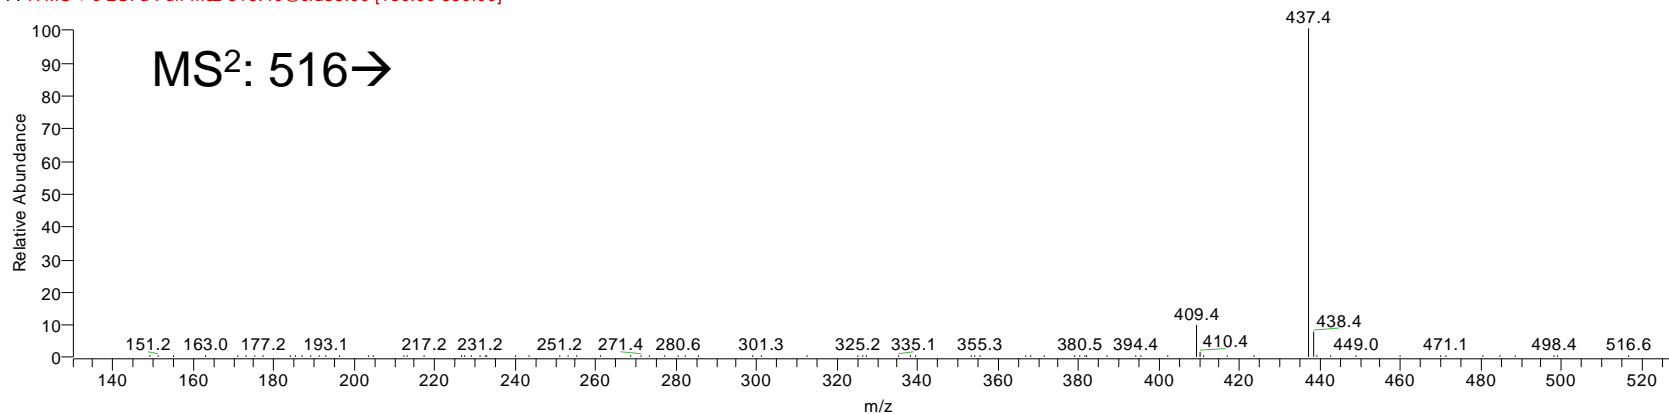

**Fig. S4b**

C<sup>4,24</sup>-3-one 3-GP

CTX\_UFR2\_FR1\_2

30/06/2006 18:49:40

CTX\_UFR2\_FR1\_2 #1311 RT: 10.57 AV: 1 NL: 1.75E4  
F: ITMS + c ESI d Full ms3 516.40@cid35.00 437.39@cid35.00 [110.00-450.00]

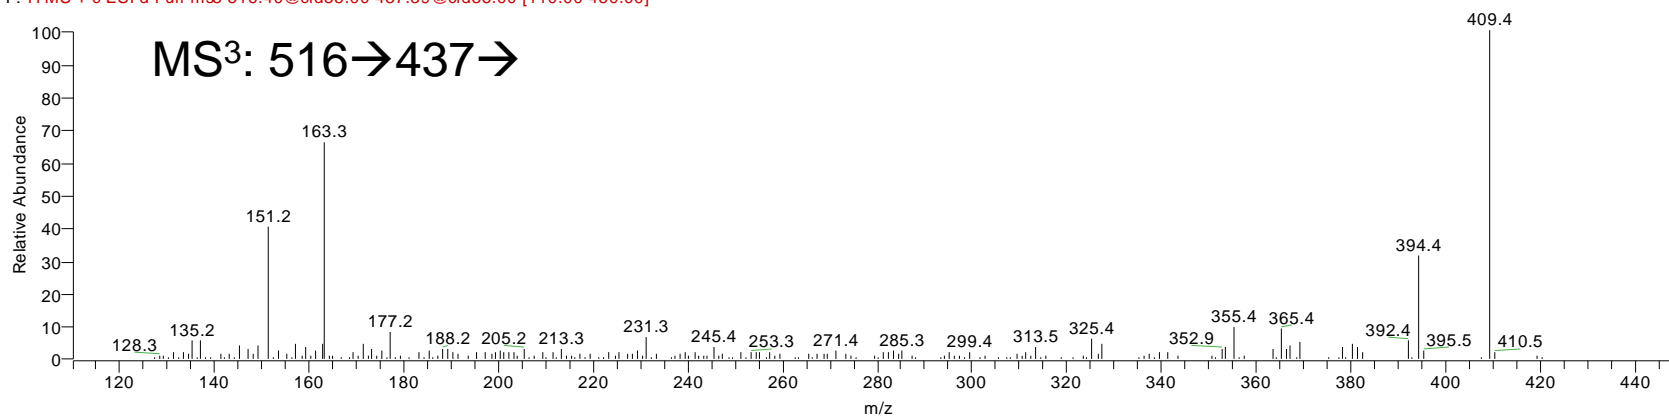

2 #1288 RT: 10.77 AV: 1 NL: 2.64E4  
F: ITMS + c ESI d Full ms3 516.40@cid35.00 437.34@cid35.00 [110.00-450.00]

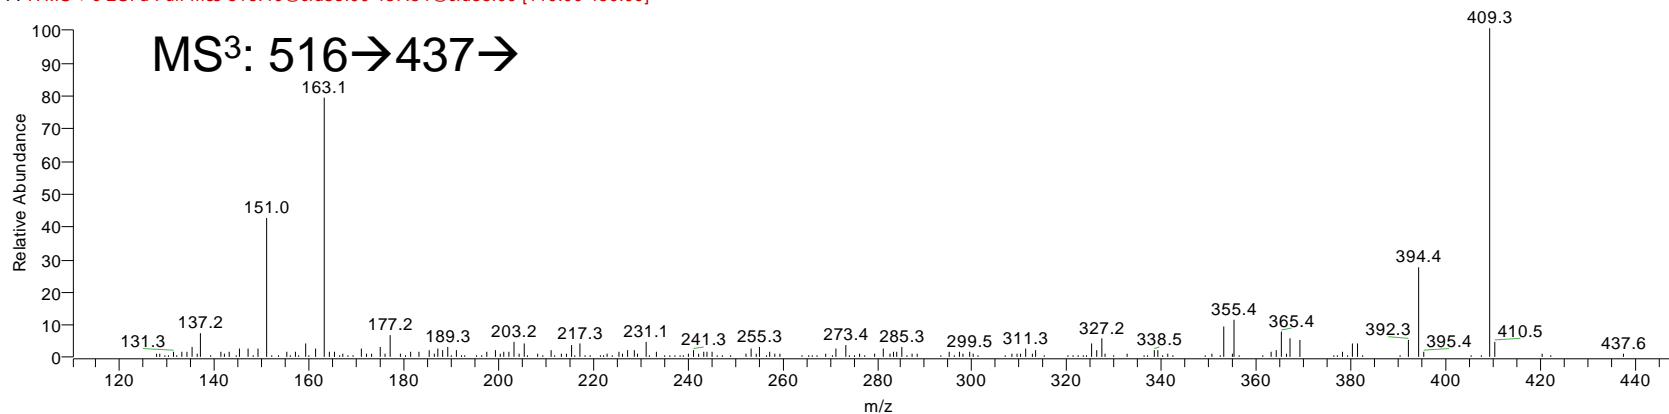

**Fig. S4c**

C<sub>4,7</sub>or<sub>8</sub>-3-one 3-GP

CTX\_UFR2\_FR1\_2

30/06/2006 18:49:40

CTX\_UFR2\_FR1\_2 #1375 RT: 11.03 AV: 1 NL: 4.33E3  
F: ITMS + c ESI d Full ms2 516.40@cid35.00 [130.00-1045.00]

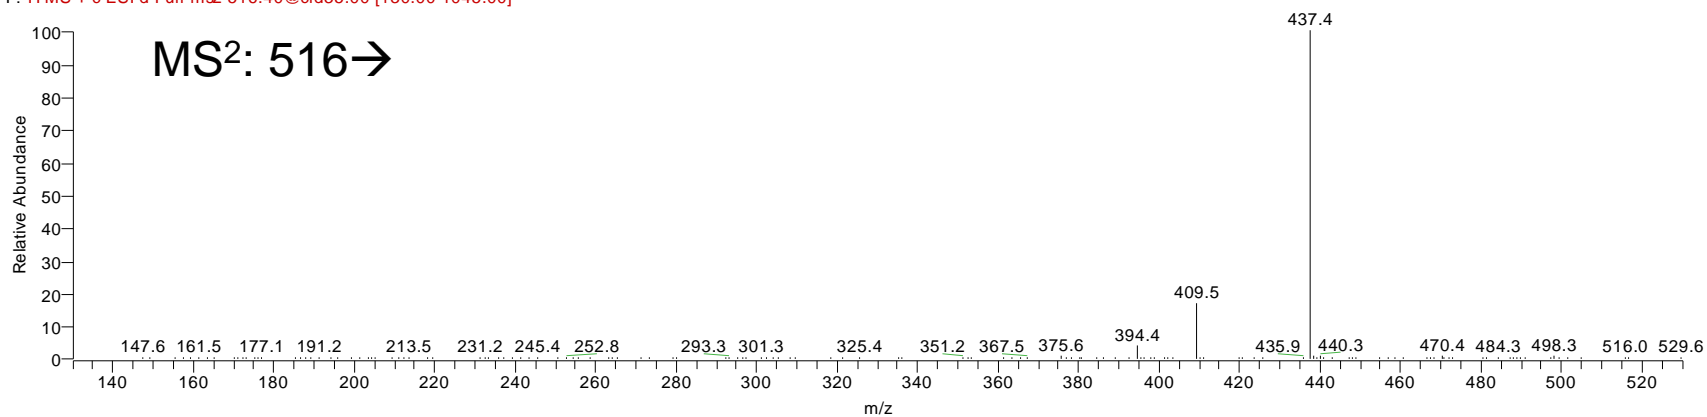

3 #1346 RT: 11.23 AV: 1 NL: 1.32E5  
F: ITMS + c ESI d Full ms2 516.40@cid35.00 [130.00-530.00]

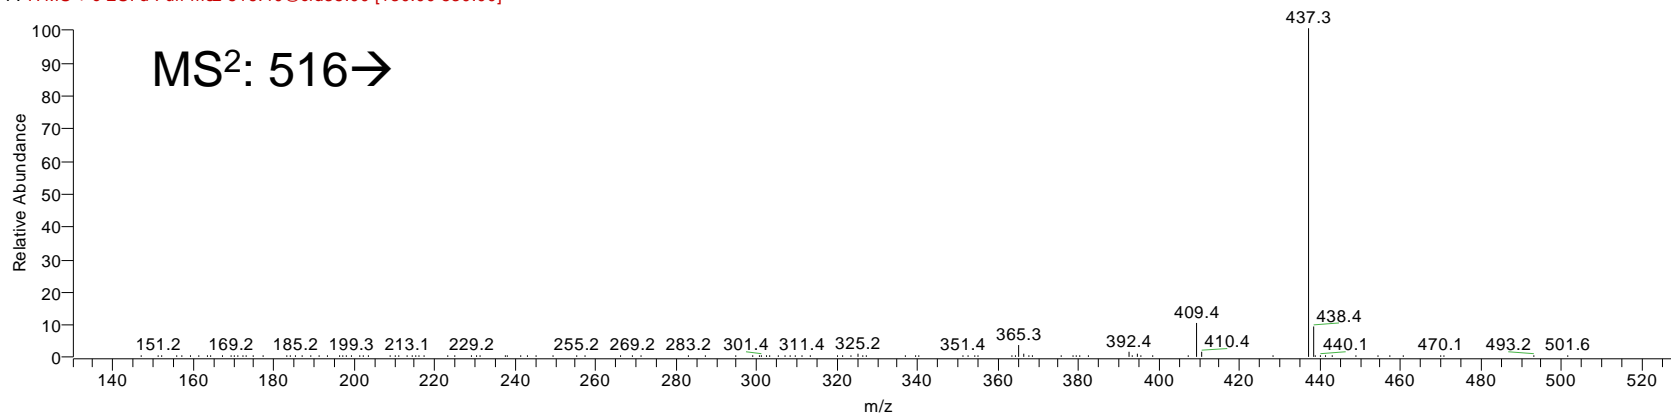



**Fig. S4d**

C<sub>4,7</sub>or<sub>8</sub>-3-one 3-GP

CTX\_UFR2\_FR1\_2

30/06/2006 18:49:40

CTX\_UFR2\_FR1\_2 #1376 RT: 11.04 AV: 1 NL: 2.66E2  
F: ITMS + c ESI d Full ms3 516.40@cid35.00 437.40@cid35.00 [110.00-885.00]

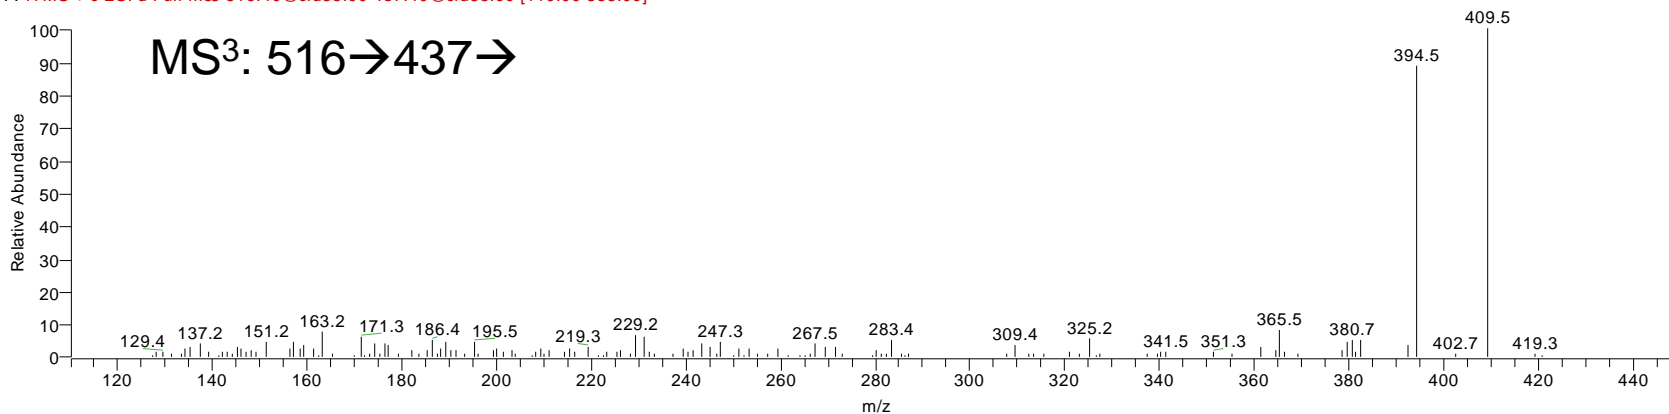

3 #1347 RT: 11.23 AV: 1 NL: 9.79E3  
F: ITMS + c ESI d Full ms3 516.40@cid35.00 437.33@cid35.00 [110.00-450.00]

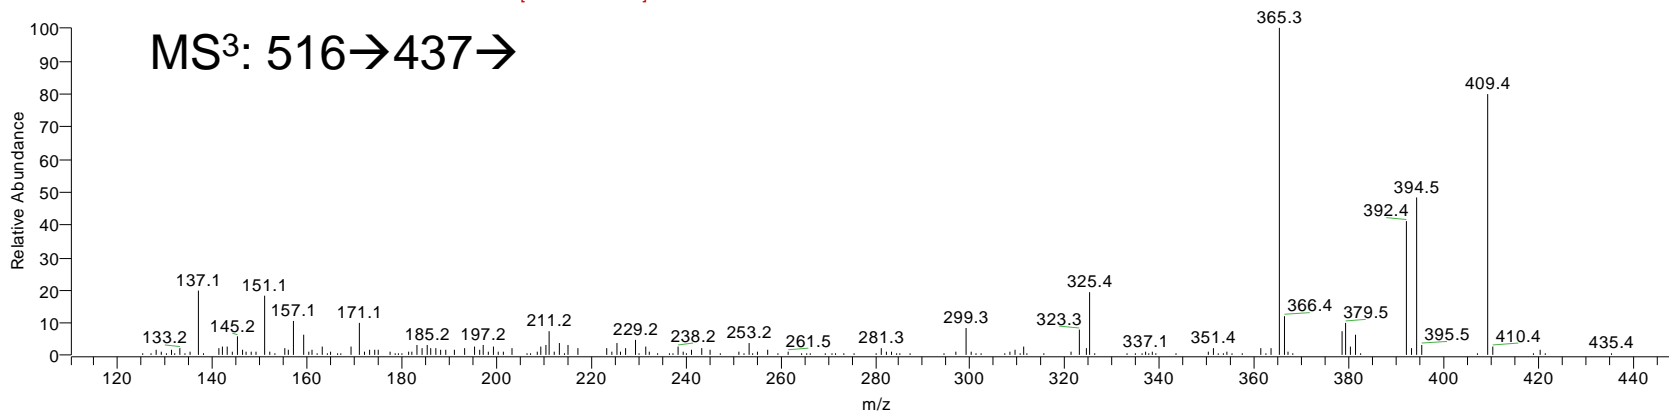

**Fig. S4e**

**C<sup>4</sup>-3-one 3-GP**

CTX\_UFR2\_FR1\_2

30/06/2006 18:49:40

CTX\_UFR2\_FR1\_2 #1433 RT: 11.44 AV: 1 NL: 2.93E6  
F: ITMS + c ESI d Full ms2 518.41@cid35.00 [130.00-530.00]

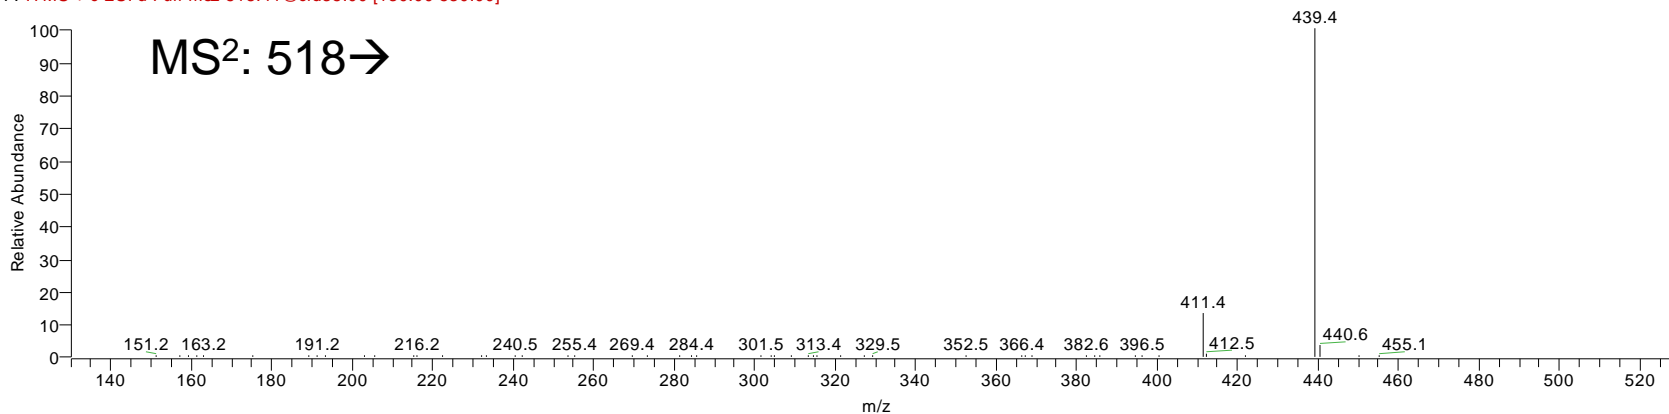

1 #1401 RT: 11.65 AV: 1 NL: 1.08E6  
F: ITMS + c ESI d Full ms2 518.41@cid35.00 [130.00-530.00]

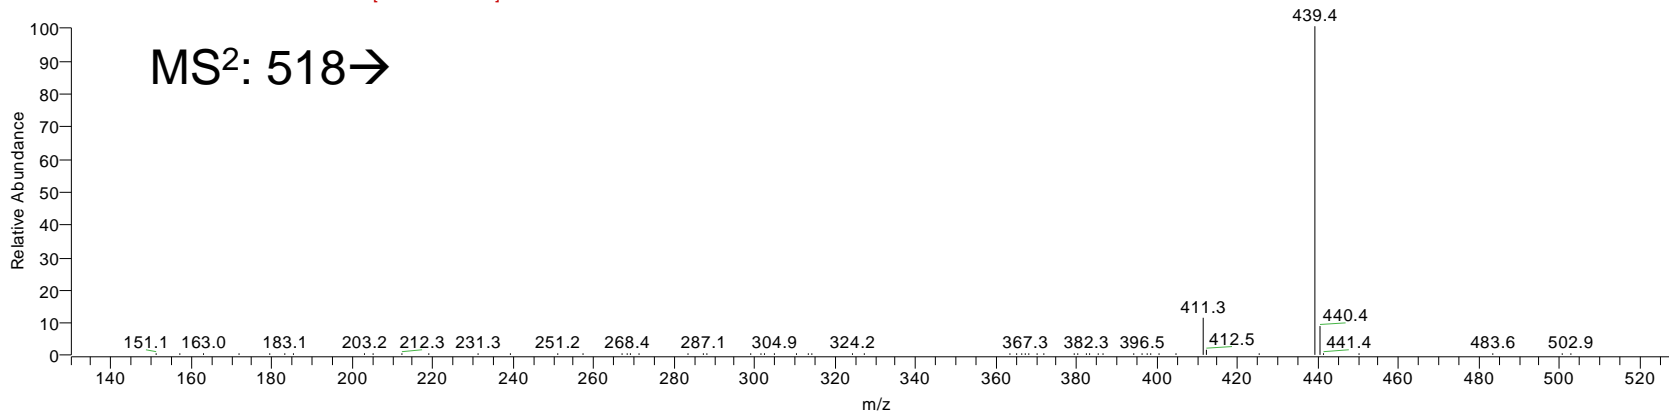

**Fig. S4f**

**C<sup>4</sup>-3-one 3-GP**

CTX\_UFR2\_FR1\_2

30/06/2006 18:49:40

CTX\_UFR2\_FR1\_2 #1434 RT: 11.44 AV: 1 NL: 2.42E5  
F: ITMS + c ESI d Full ms3 518.41@cid35.00 439.40@cid35.00 [110.00-450.00]

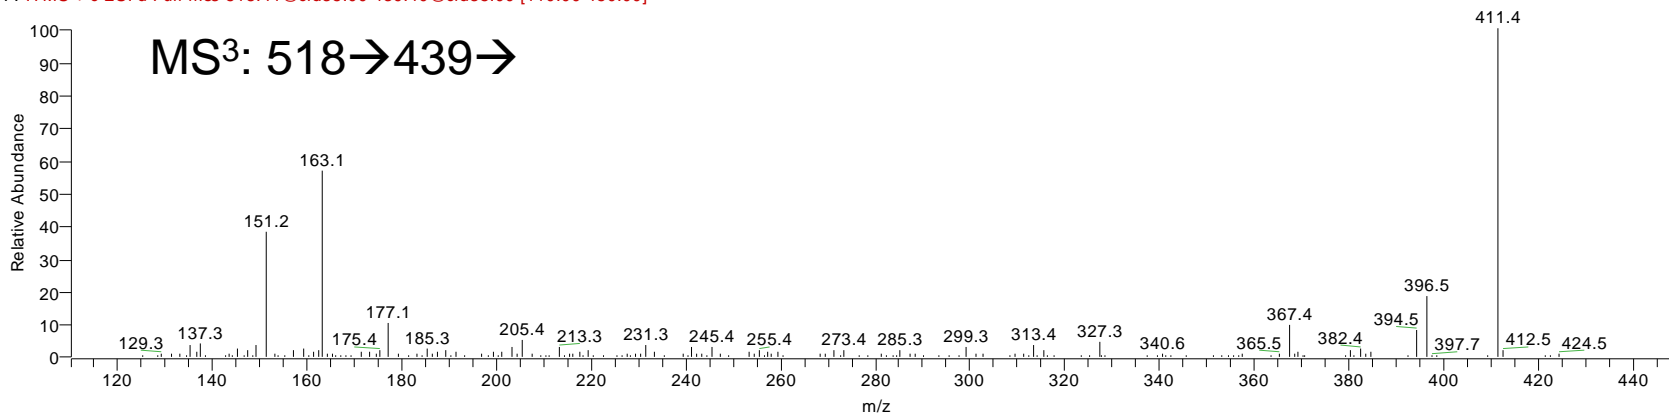

1 #1402 RT: 11.66 AV: 1 NL: 7.78E4  
F: ITMS + c ESI d Full ms3 518.41@cid35.00 439.34@cid35.00 [110.00-450.00]

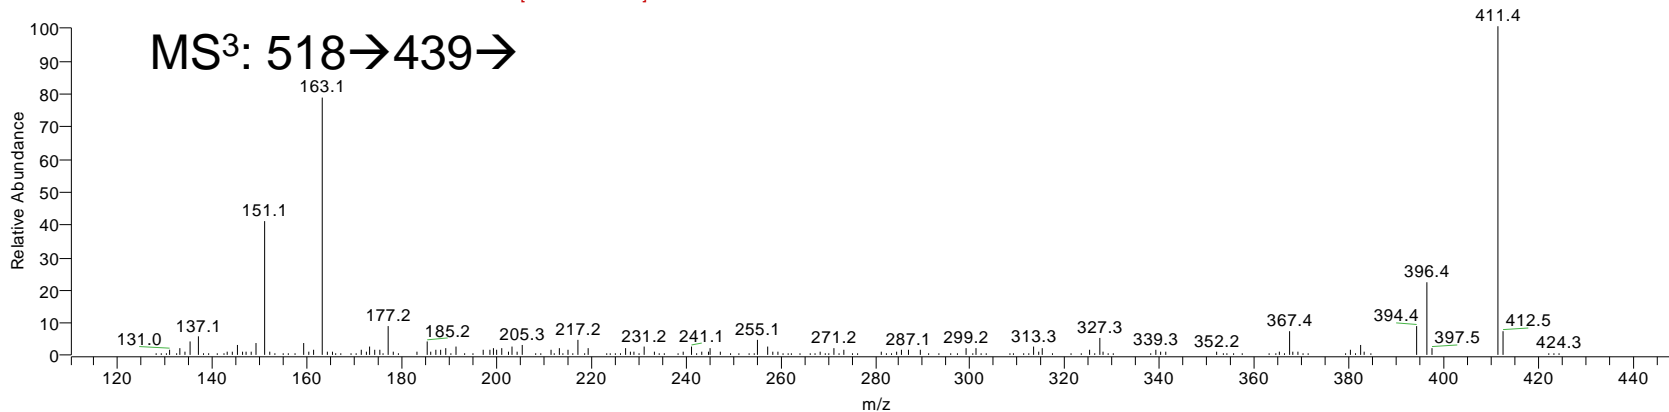

**Fig. S4g**

24-Me-C<sup>4</sup>-3-one 3-GP

CTX\_UFR2\_FR1\_2

30/06/2006 18:49:40

CTX\_UFR2\_FR1\_2 #1525 RT: 12.15 AV: 1 NL: 2.97E4  
F: ITMS + c ESI d Full ms2 532.39@cid35.00 [135.00-545.00]

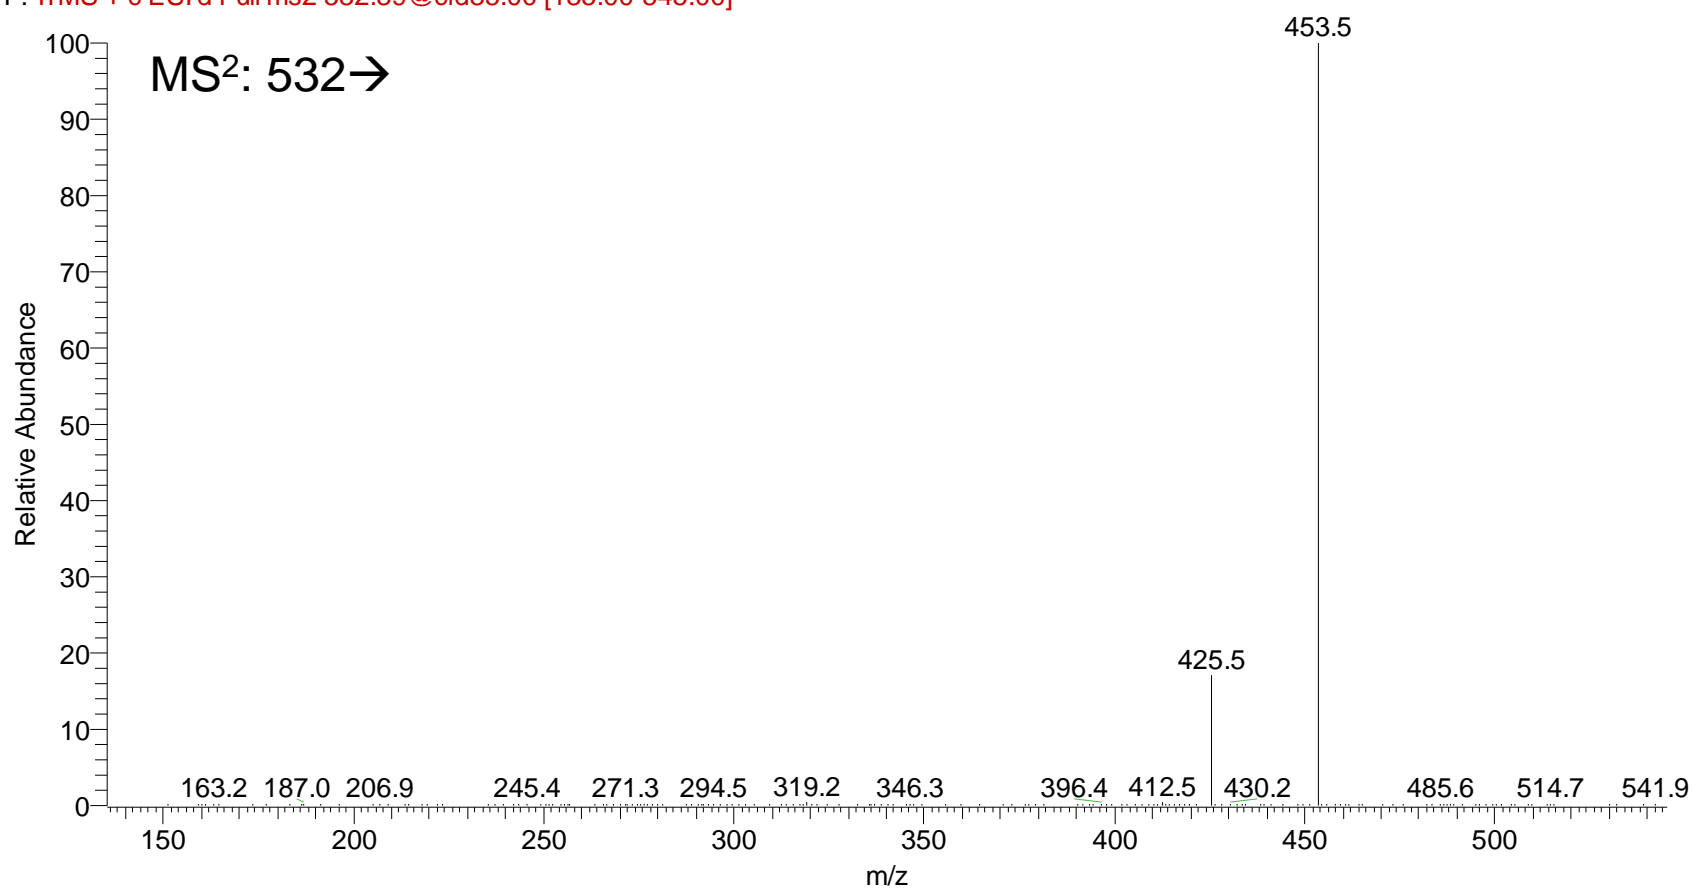

**Fig. S4h**

**24-Me-C<sup>4</sup>-3-one 3-GP**

CTX\_UFR2\_FR1\_2

30/06/2006 18:49:40

CTX\_UFR2\_FR1\_2 #1526 RT: 12.16 AV: 1 NL: 2.30E3

F: ITMS + c ESI d Full ms3 532.39@cid35.00 453.38@cid35.00 [110.00-465.00]

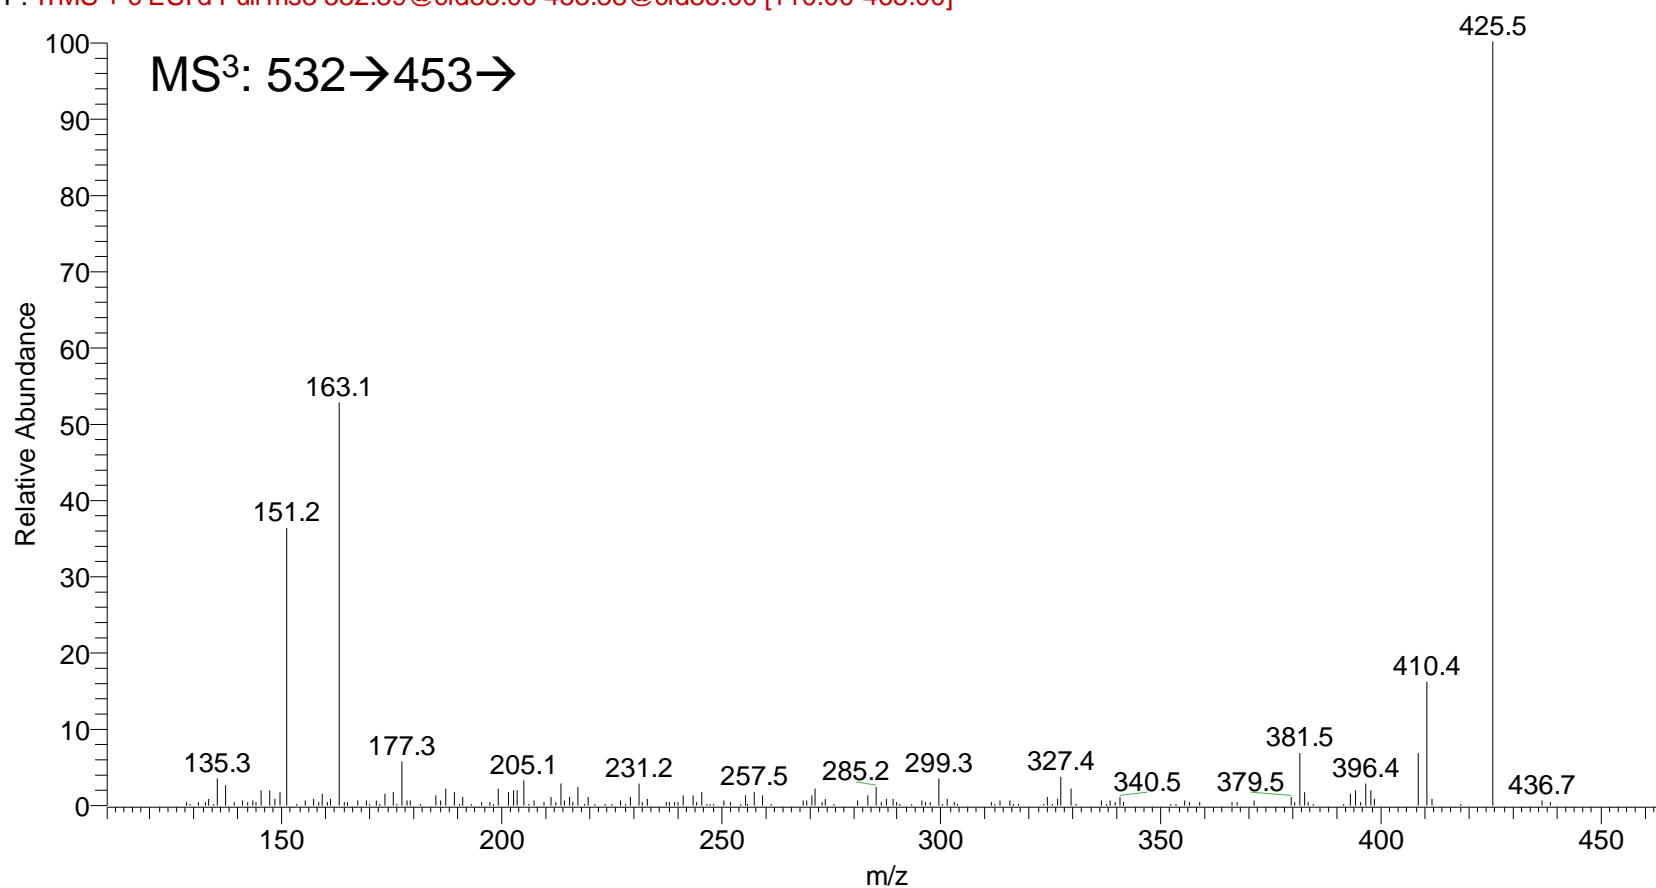

**Fig. S4i**

# C<sup>4</sup>-24S,25-epoxide-3-one 3-GP

CTX\_UFR2\_FR1\_2

30/06/2006 18:49:40

CTX\_UFR2\_FR1\_2 #808 RT: 6.62 AV: 1 NL: 1.90E4  
F: ITMS + c ESI d Full ms2 532.39@cid35.00 [135.00-545.00]

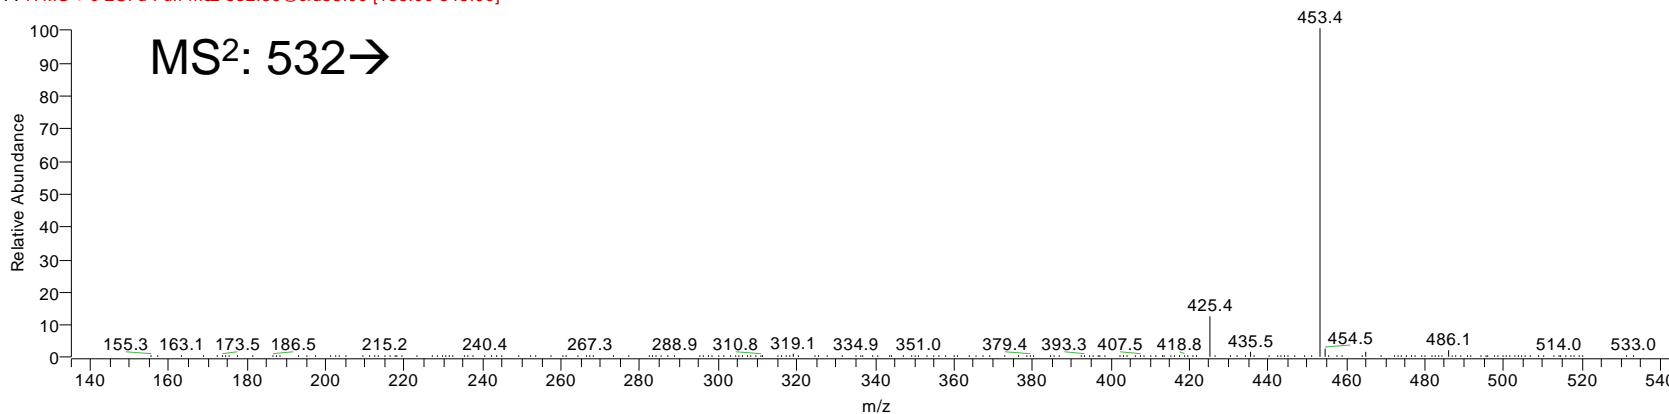

sample\_39 #717 RT: 7.08 AV: 1 NL: 4.62E3  
F: ITMS + c ESI d Full ms2 532.39@cid30.00 [135.00-545.00]

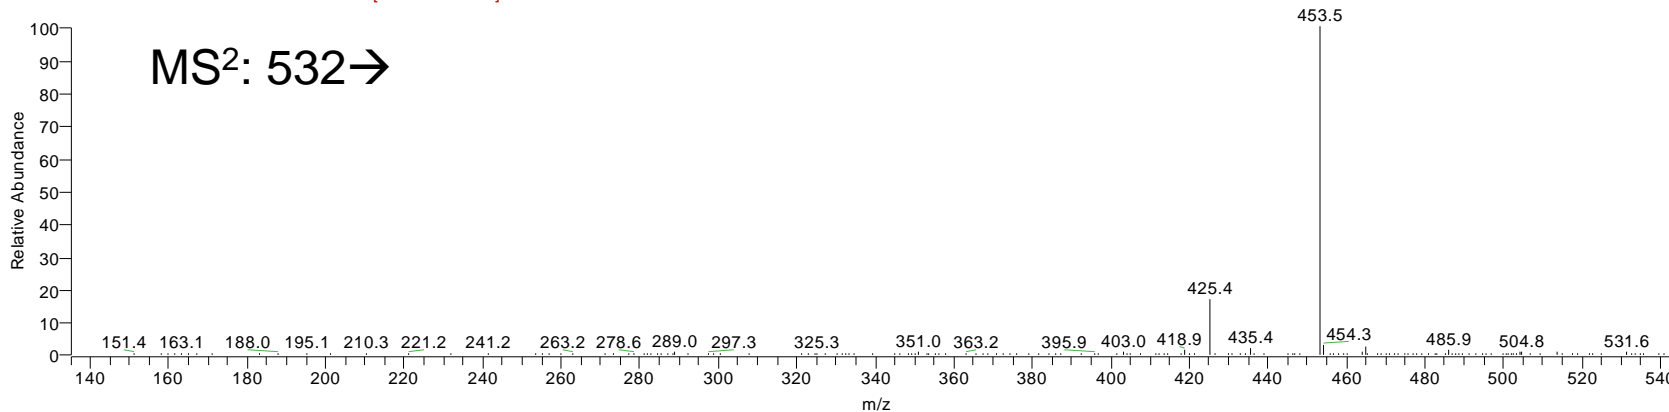

**Fig. S4j**

# C<sup>4</sup>-24S,25-epoxide-3-one 3-GP

CTX\_UFR2\_FR1\_2

30/06/2006 18:49:40

CTX\_UFR2\_FR1\_2 #809 RT: 6.62 AV: 1 NL: 2.24E3

F: ITMS + c ESI d Full ms3 532.39@cid35.00 453.38@cid35.00 [110.00-465.00]

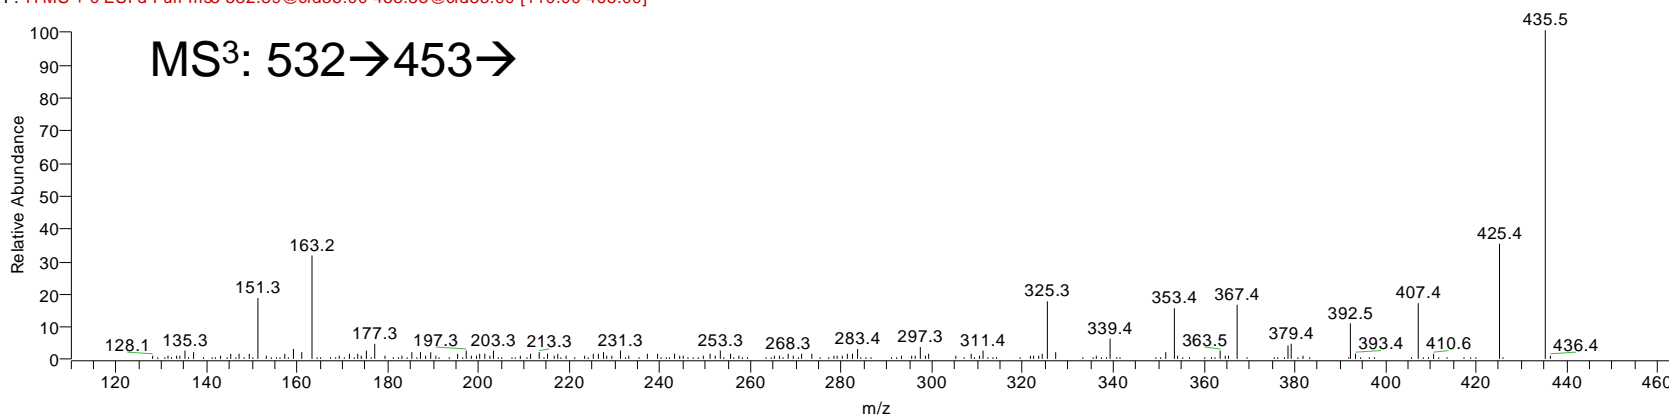

sample\_39 #718 RT: 7.09 AV: 1 NL: 3.31E2

F: ITMS + c ESI d Full ms3 532.39@cid30.00 453.46@cid35.00 [110.00-465.00]

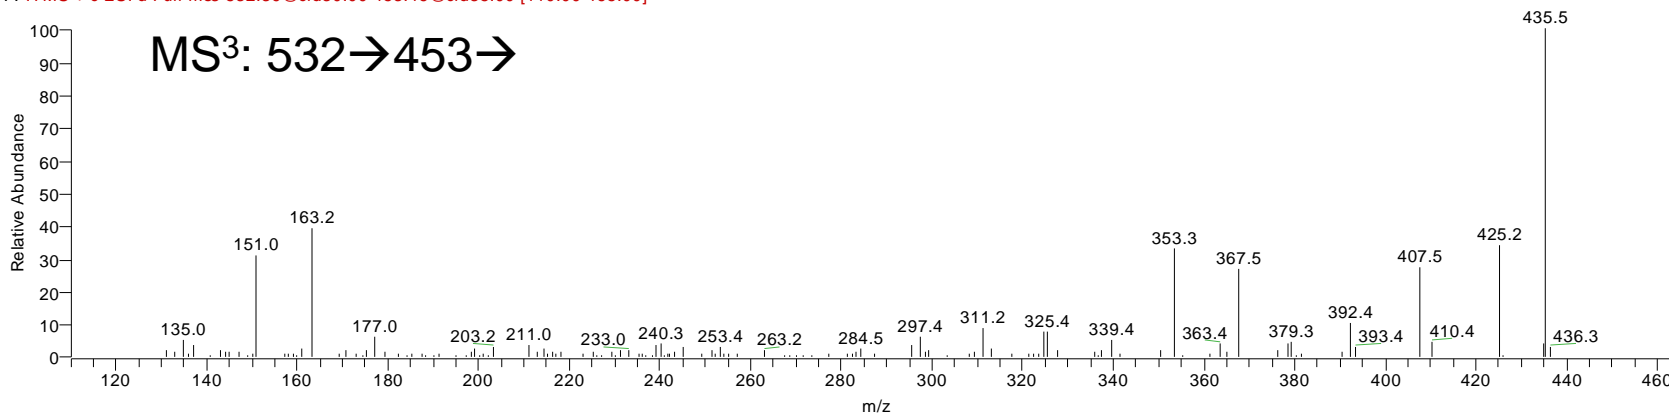

**Fig. S4k**

# C<sup>4</sup>-24-ol,25-OMe-3-one 3-GP

CTX\_UFR2\_FR1\_2

30/06/2006 18:49:40

CTX\_UFR2\_FR1\_2 #740 RT: 6.07 AV: 1 NL: 3.39E4  
F: ITMS + c ESI d Full ms2 564.38@cid35.00 [145.00-575.00]

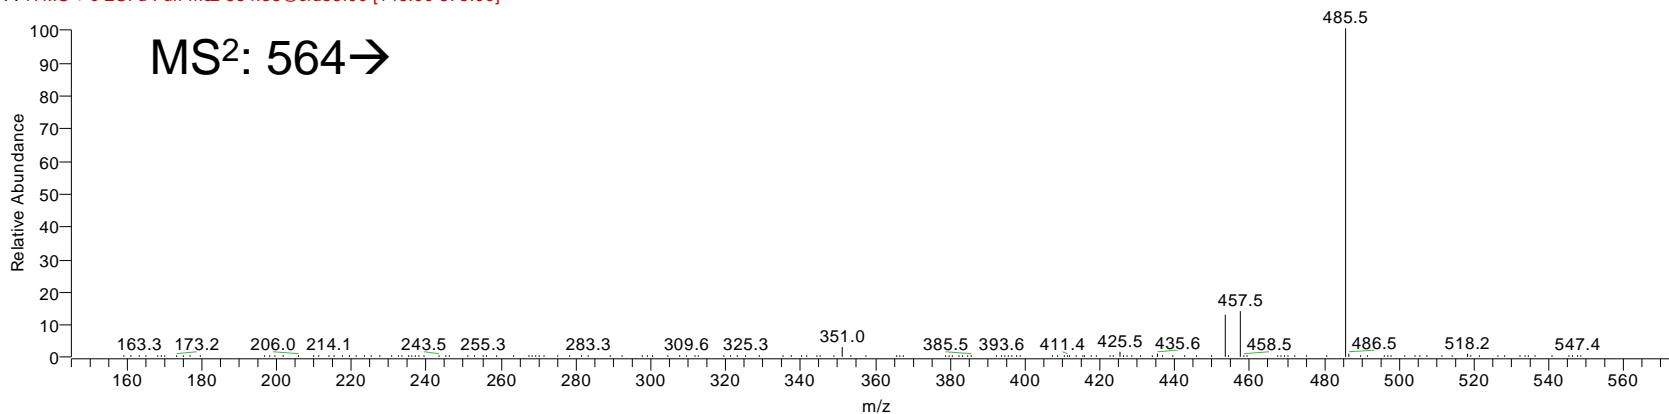

sample\_39 #646 RT: 6.43 AV: 1 NL: 9.65E4  
F: ITMS + c ESI d Full ms2 564.42@cid30.00 [145.00-575.00]

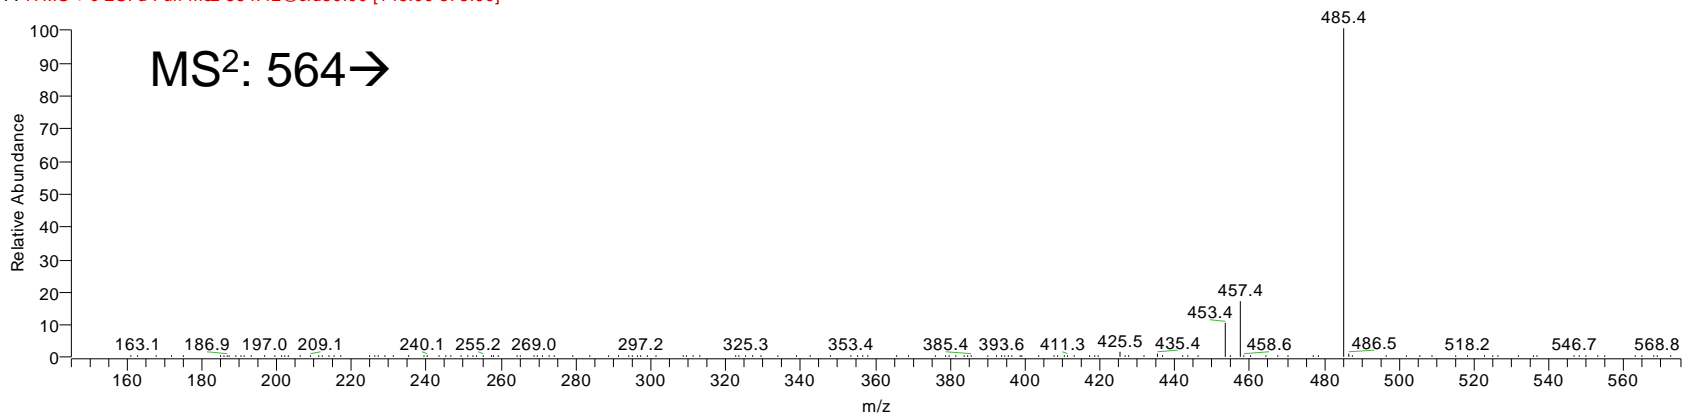



**Fig. S4I**

**C<sup>4</sup>-24-ol,25-OMe-3-one 3-GP**

CTX\_UFR2\_FR1\_2

30/06/2006 18:49:40

CTX\_UFR2\_FR1\_2 #741 RT: 6.08 AV: 1 NL: 1.32E4  
F: ITMS + c ESI d Full ms3 564.38@cid35.00 485.41@cid35.00 [120.00-500.00]

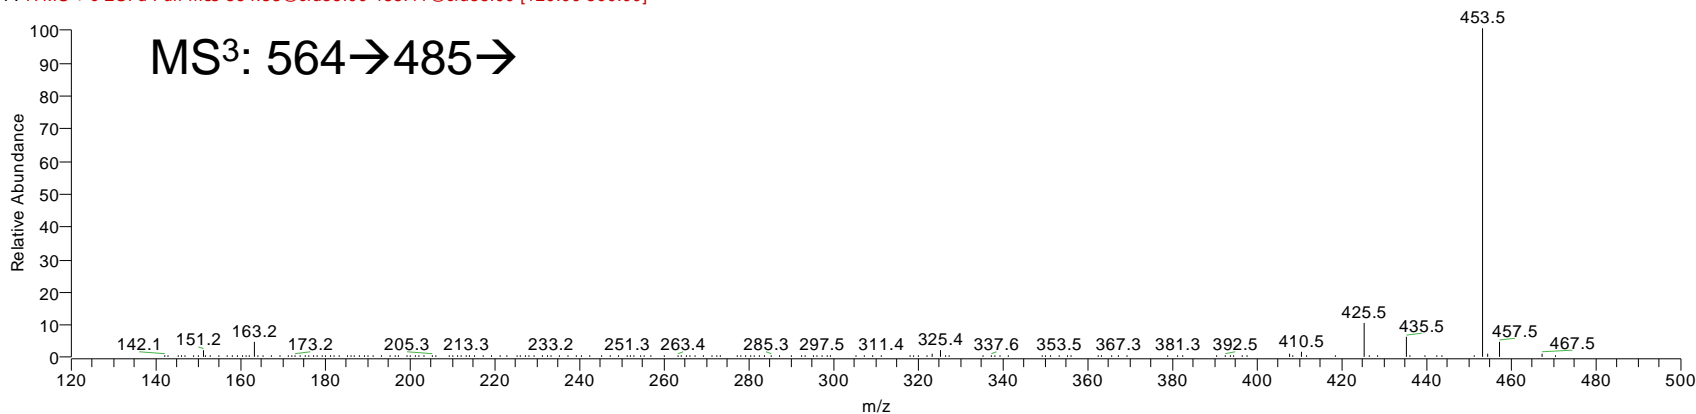

sample\_39 #647 RT: 6.43 AV: 1 NL: 3.71E4  
F: ITMS + c ESI d Full ms3 564.42@cid30.00 485.49@cid35.00 [120.00-500.00]

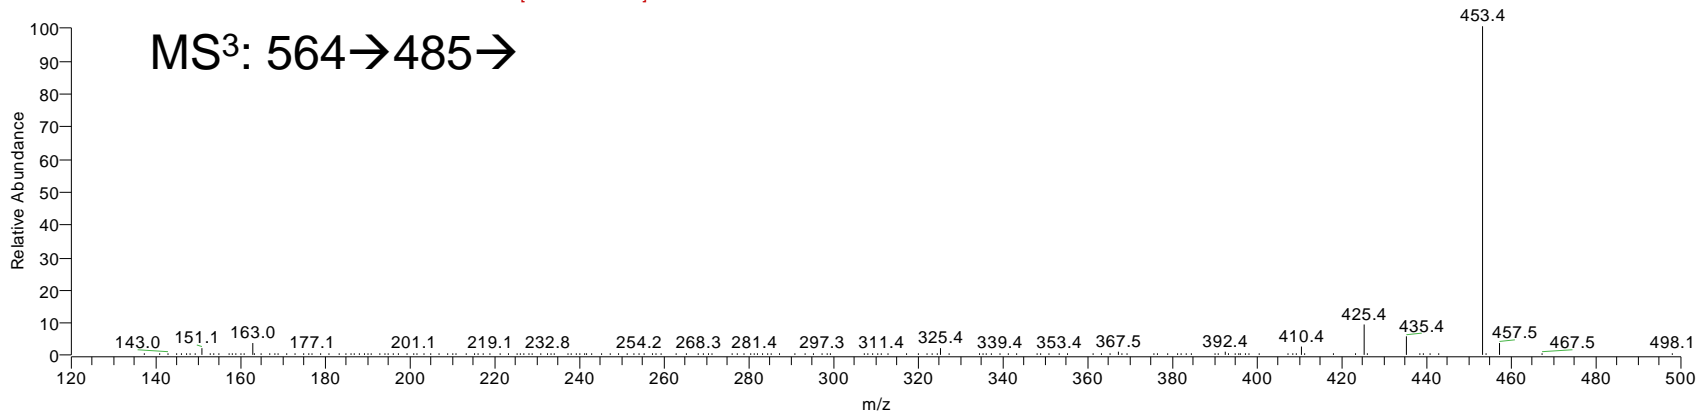

**Fig. S4m**

**C<sup>4</sup>-3,24-dione 3-GP**

CTX\_UFR2\_FR1\_2

30/06/2006 18:49:40

CTX\_UFR2\_FR1\_2 #901 RT: 7.38 AV: 1 NL: 3.53E4  
F: ITMS + c ESI d Full ms2 532.39@cid35.00 [135.00-545.00]

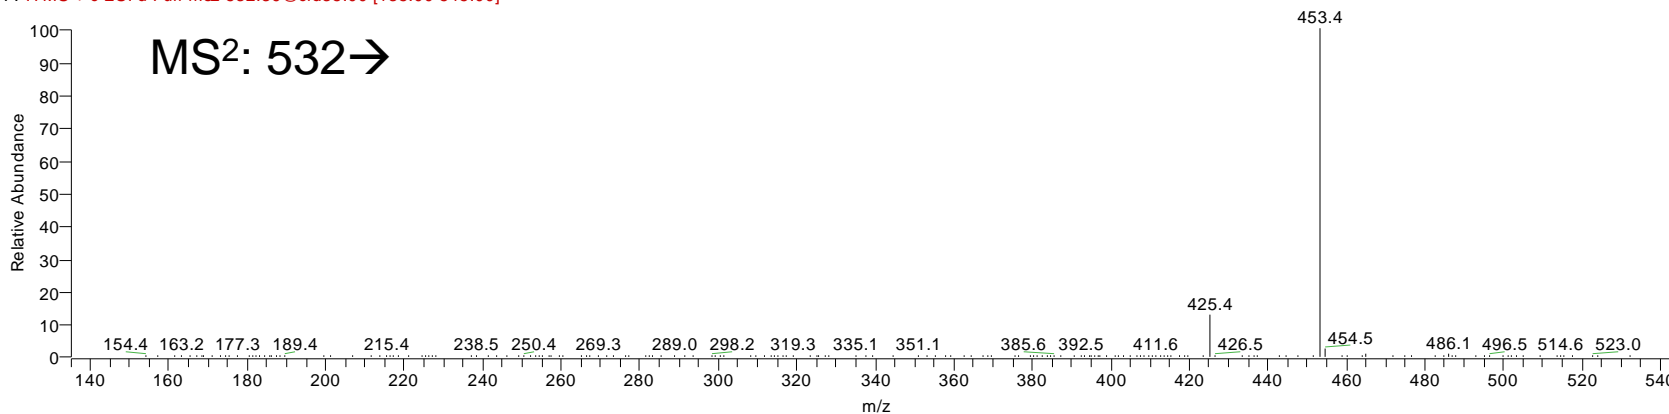

23 #890 RT: 7.51 AV: 1 NL: 6.32E5  
F: ITMS + c ESI d Full ms2 532.39@cid35.00 [135.00-545.00]

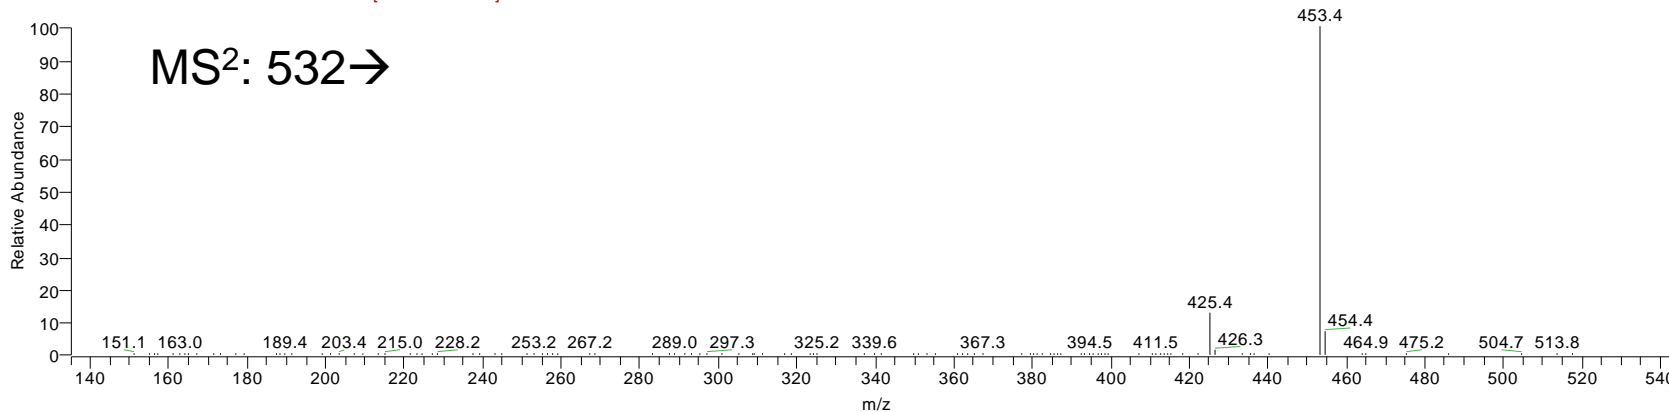

**Fig. S4n**

# C<sup>4</sup>-3,24-dione 3-GP

CTX\_UFR2\_FR1\_2

30/06/2006 18:49:40

CTX\_UFR2\_FR1\_2 #902 RT: 7.38 AV: 1 NL: 2.52E3  
F: ITMS + c ESI d Full ms3 532.39@cid35.00 453.38@cid35.00 [110.00-465.00]

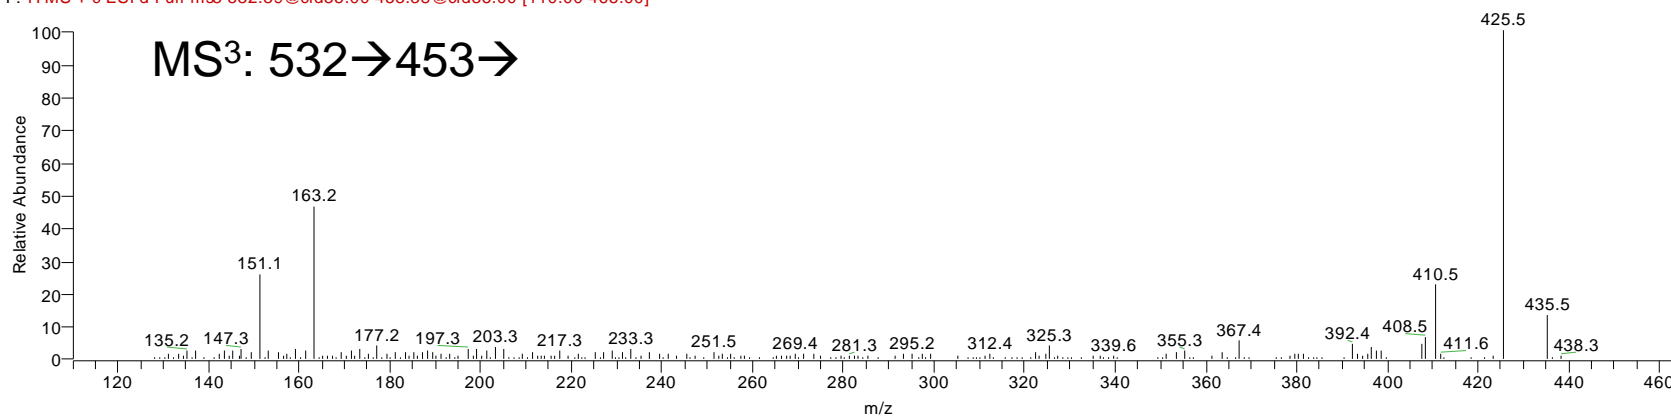

23 #891 RT: 7.51 AV: 1 NL: 5.26E4  
F: ITMS + c ESI d Full ms3 532.39@cid35.00 453.31@cid35.00 [110.00-465.00]

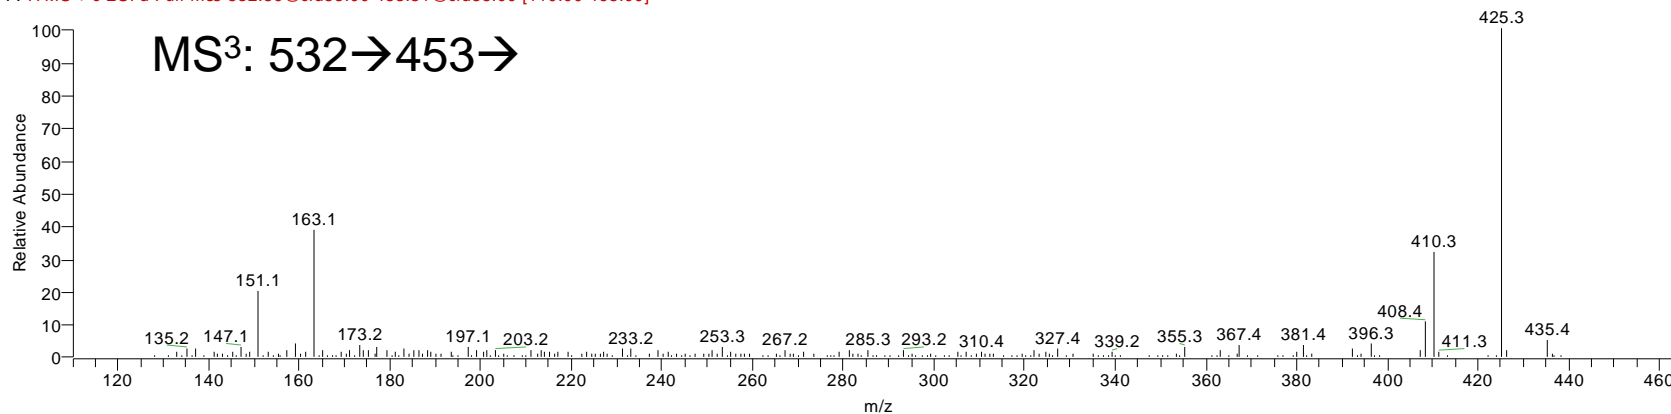

**Fig. S4o**

**C<sup>4</sup>-3,6-dione 3-GP**

CTX\_UFR2\_FR1\_2

30/06/2006 18:49:40

CTX\_UFR2\_FR1\_2 #1204 RT: 9.79 AV: 1 NL: 6.86E4  
F: ITMS + c ESI d Full ms2 532.39@cid35.00 [135.00-545.00]

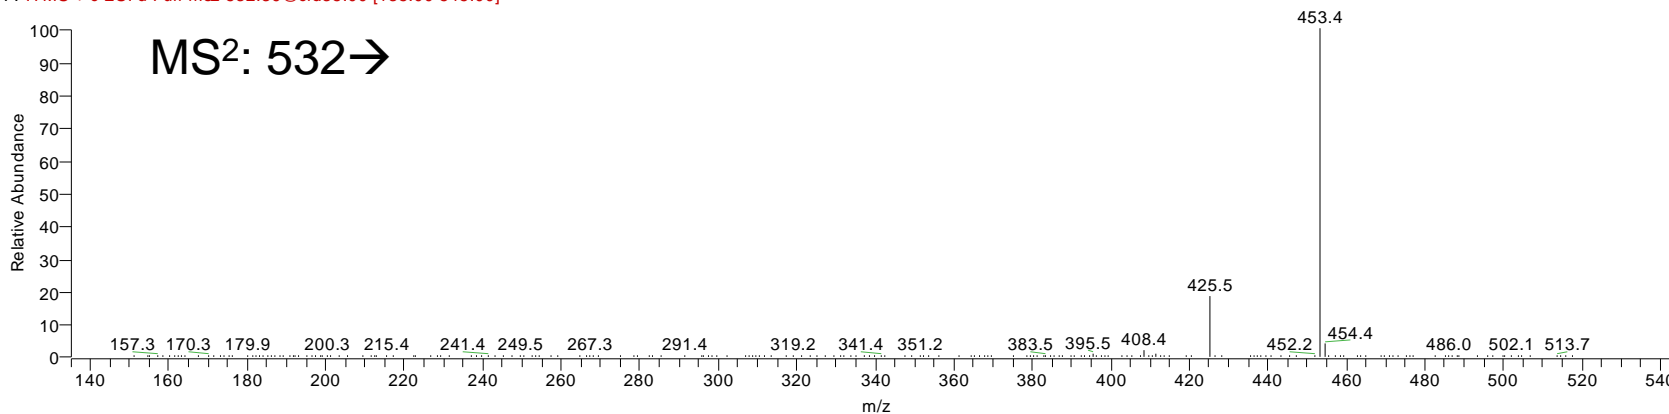

17 #1134 RT: 9.53 AV: 1 NL: 1.59E5  
F: ITMS + c ESI d Full ms2 532.39@cid35.00 [135.00-545.00]

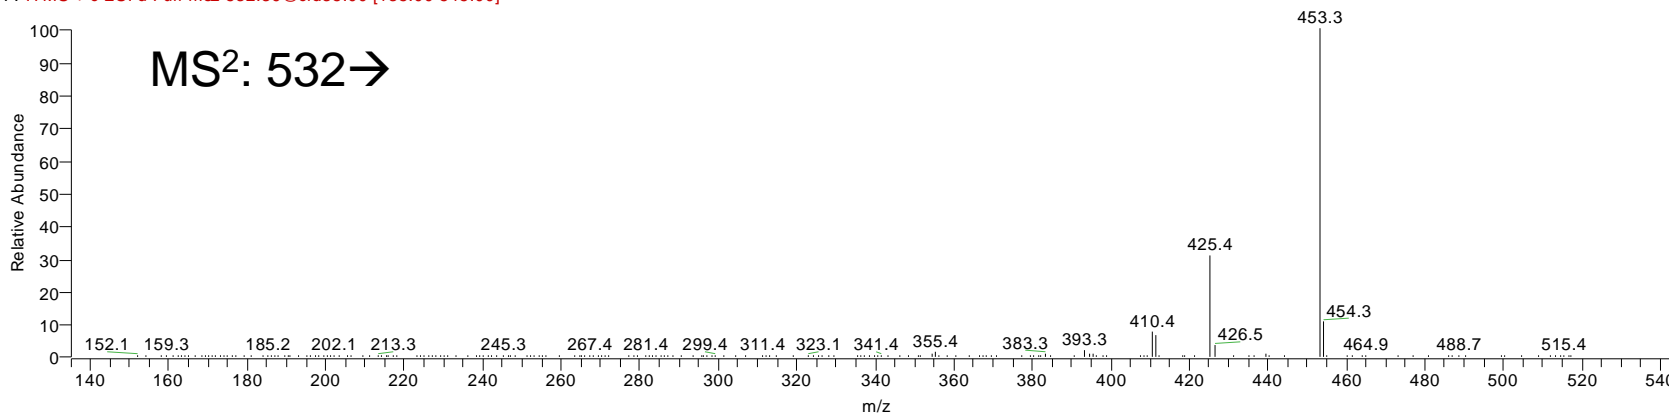

**Fig. S4p**

# C<sup>4</sup>-3,6-dione 3-GP

CTX\_UFR2\_FR1\_2

30/06/2006 18:49:40

CTX\_UFR2\_FR1\_2 #1205 RT: 9.79 AV: 1 NL: 7.82E3  
F: ITMS + c ESI d Full ms3 532.39@cid35.00 453.38@cid35.00 [110.00-465.00]

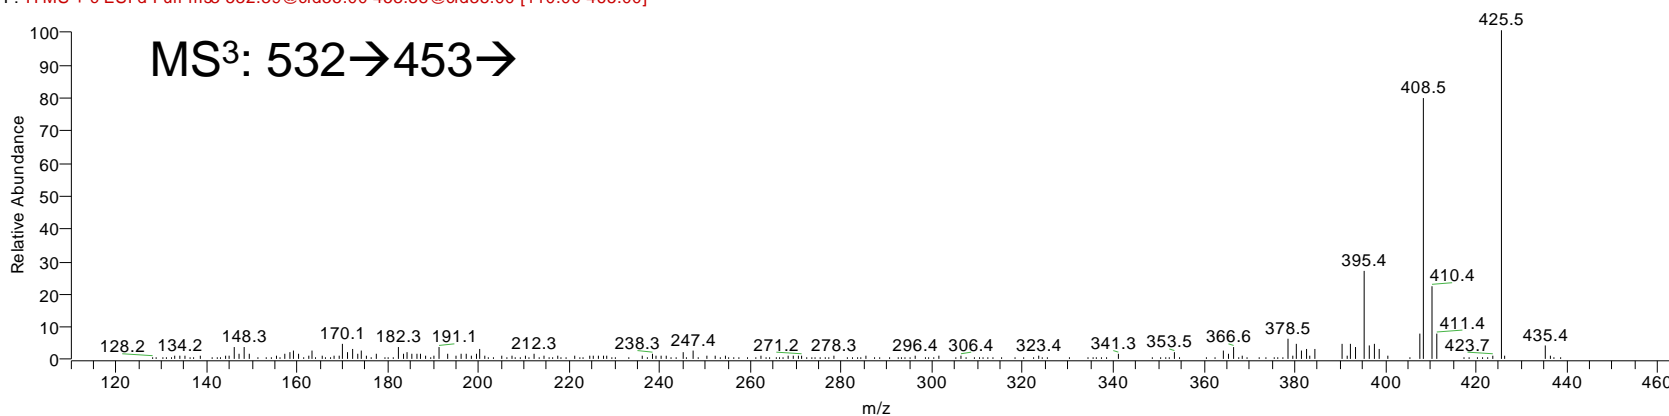

17 #1135 RT: 9.54 AV: 1 NL: 7.54E4  
F: ITMS + c ESI d Full ms3 532.39@cid35.00 453.30@cid35.00 [110.00-465.00]

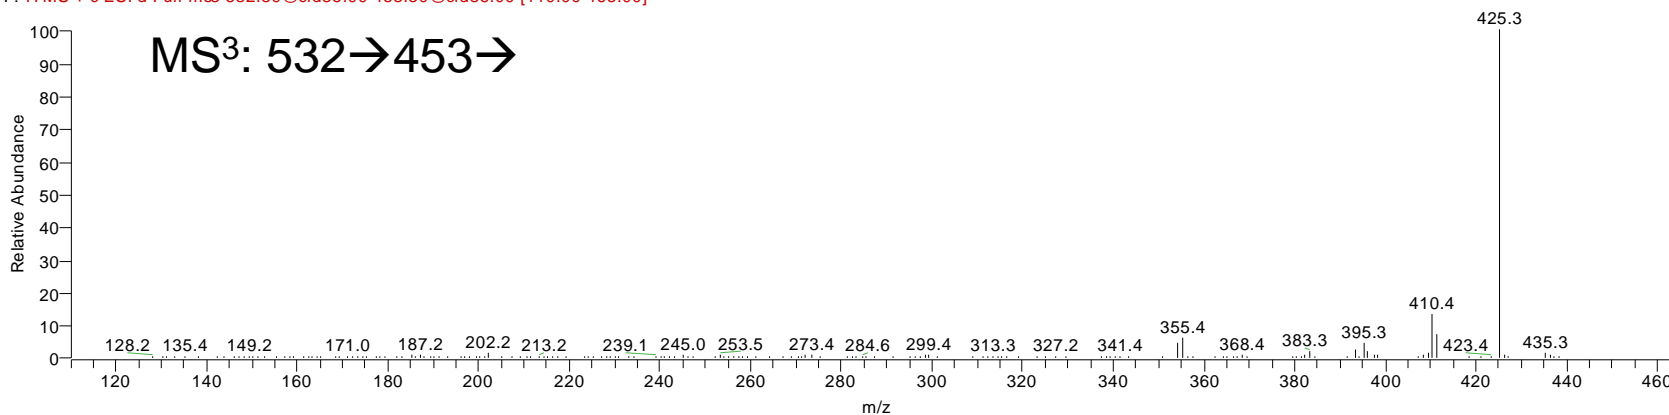

**Fig. S4q**

**C<sup>4</sup>-22R-ol-3-one 3-GP**

CTX\_UFR2\_FR1\_2

30/06/2006 18:49:40

CTX\_UFR2\_FR1\_2 #753 RT: 6.17 AV: 1 NL: 2.54E3  
F: ITMS + c ESI d Full ms<sup>2</sup> 534.41@cid35.00 [135.00-1080.00]

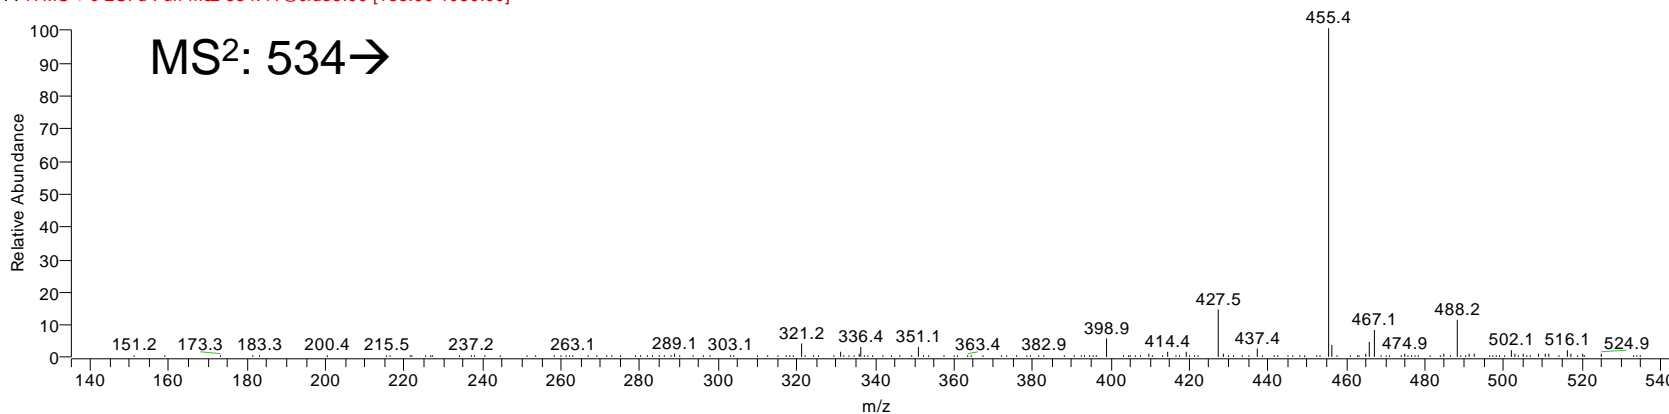

9 #752 RT: 6.24 AV: 1 NL: 5.08E5  
F: ITMS + c ESI d Full ms<sup>2</sup> 534.41@cid35.00 [135.00-545.00]

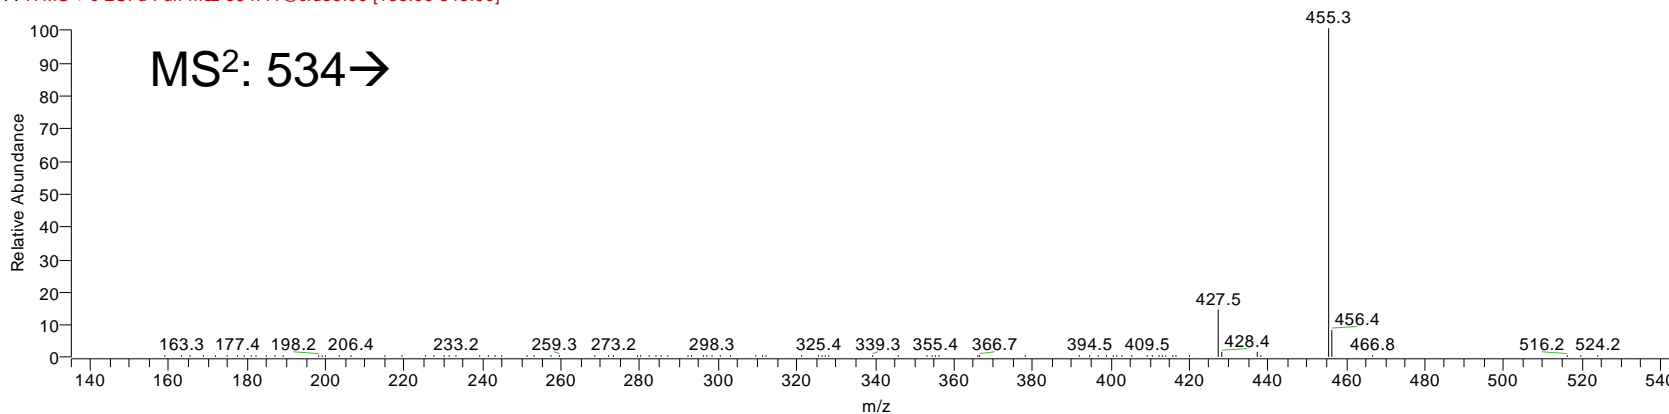

**Fig. S4r**

# C<sup>4</sup>-22R-ol-3-one 3-GP

CTX\_UFR2\_FR1\_2

30/06/2006 18:49:40

CTX\_UFR2\_FR1\_2 #754 RT: 6.18 AV: 1 NL: 1.94E2  
F: ITMS + c ESI d Full ms3 534.41@cid35.00 455.35@cid35.00 [115.00-925.00]

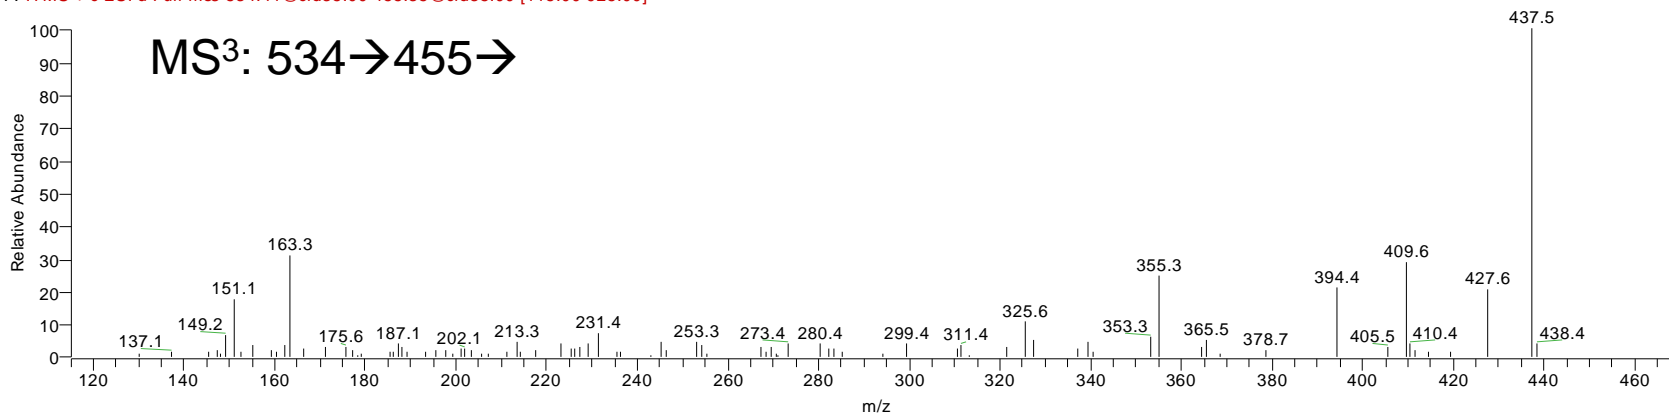

9 #753 RT: 6.24 AV: 1 NL: 6.08E4  
F: ITMS + c ESI d Full ms3 534.41@cid35.00 455.34@cid35.00 [115.00-470.00]

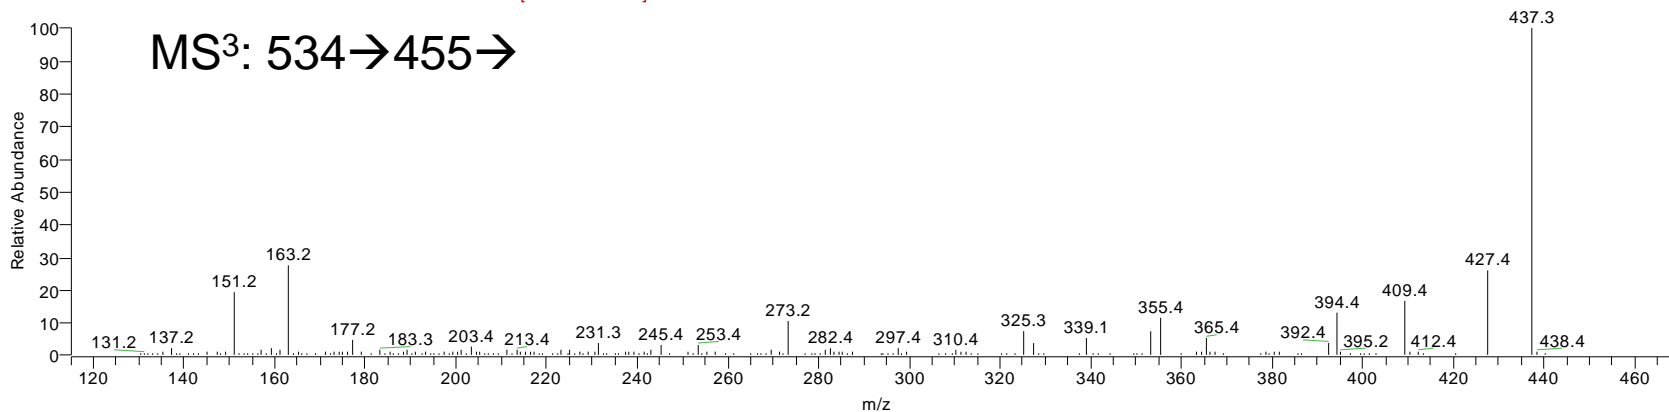

**Fig. S4s**

**C<sup>4</sup>-24S-ol-3-one 3-GP**

CTX\_UFR2\_FR1\_2

30/06/2006 18:49:40

CTX\_UFR2\_FR1\_2 #870 RT: 7.12 AV: 1 NL: 6.97E3  
F: ITMS + c ESI d Full ms2 534.41@cid35.00 [135.00-545.00]

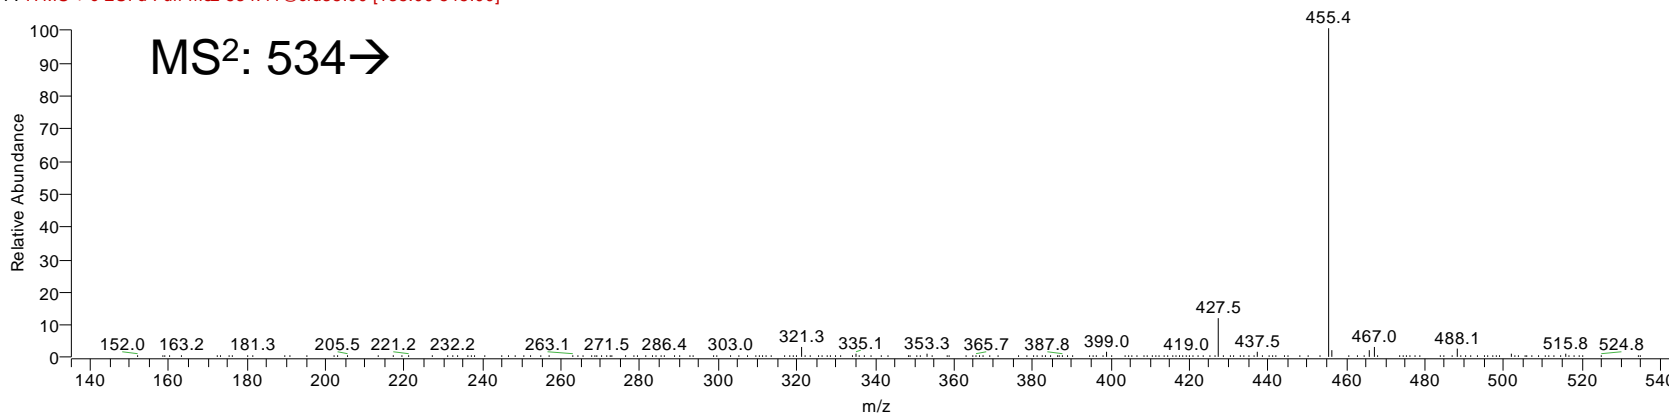

11 #860 RT: 7.25 AV: 1 NL: 6.73E5  
F: ITMS + c ESI d Full ms2 534.41@cid35.00 [135.00-545.00]

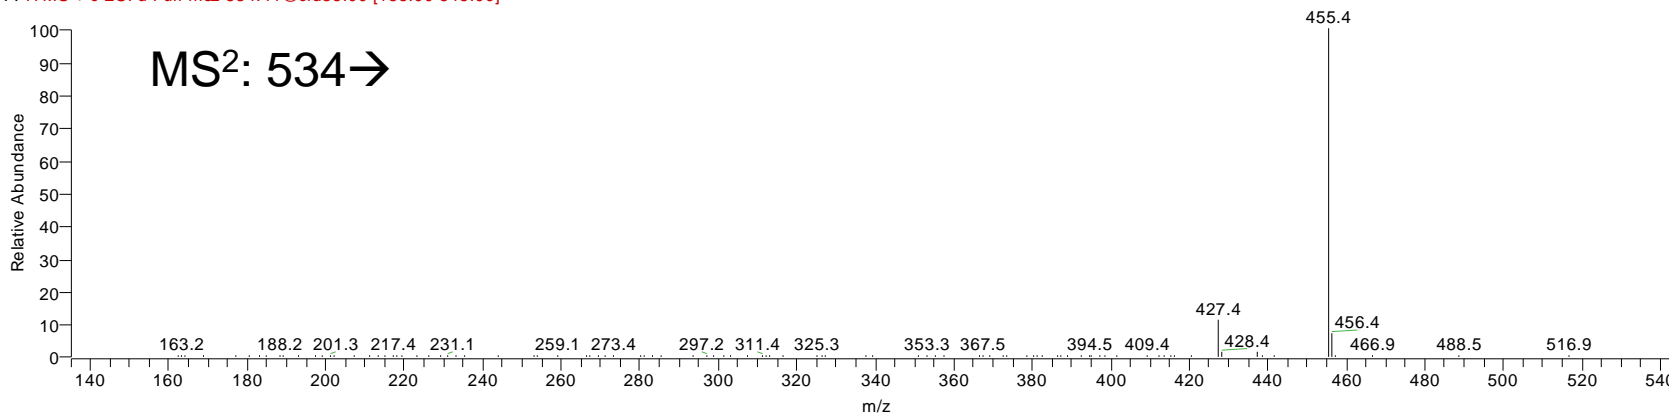



**Fig. S4t**

**C<sup>4</sup>-24S-ol-3-one 3-GP**

CTX\_UFR2\_FR1\_2

30/06/2006 18:49:40

CTX\_UFR2\_FR1\_2 #871 RT: 7.13 AV: 1 NL: 1.21E3  
F: ITMS + c ESI d Full ms3 534.41@cid35.00 455.33@cid35.00 [115.00-470.00]

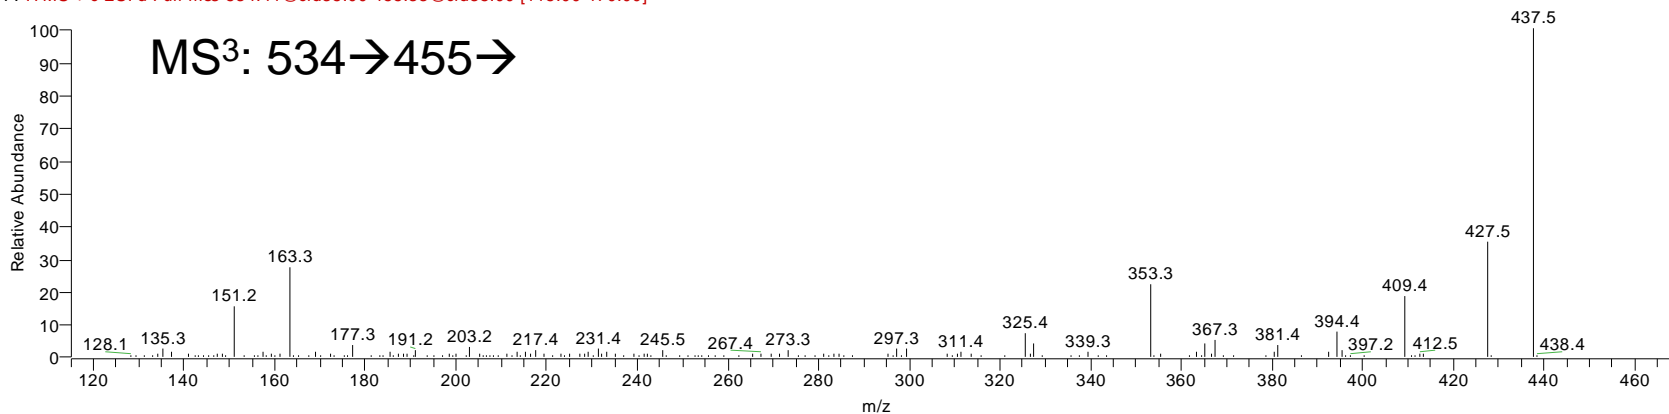

11 #861 RT: 7.26 AV: 1 NL: 9.18E4  
F: ITMS + c ESI d Full ms3 534.41@cid35.00 455.29@cid35.00 [115.00-470.00]

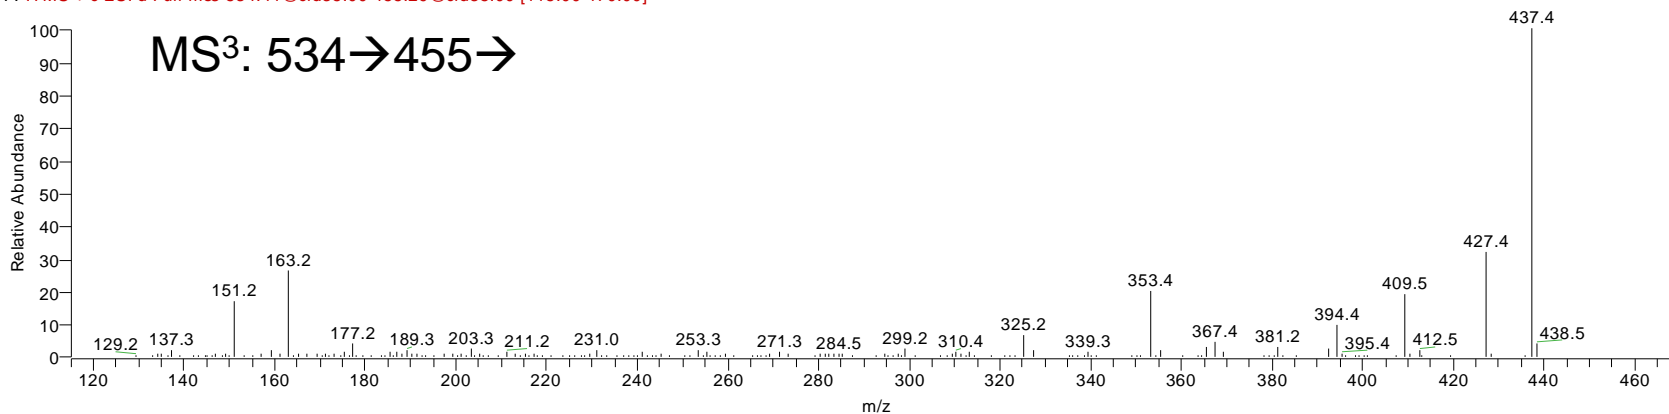

**Fig. S4u**

**C<sup>4</sup>-25-ol-3-one 3-GP**

CTX\_UFR2\_FR1\_2

30/06/2006 18:49:40

CTX\_UFR2\_FR1\_2 #906 RT: 7.41 AV: 1 NL: 9.73E3  
F: ITMS + c ESI d Full ms2 534.41@cid35.00 [135.00-545.00]

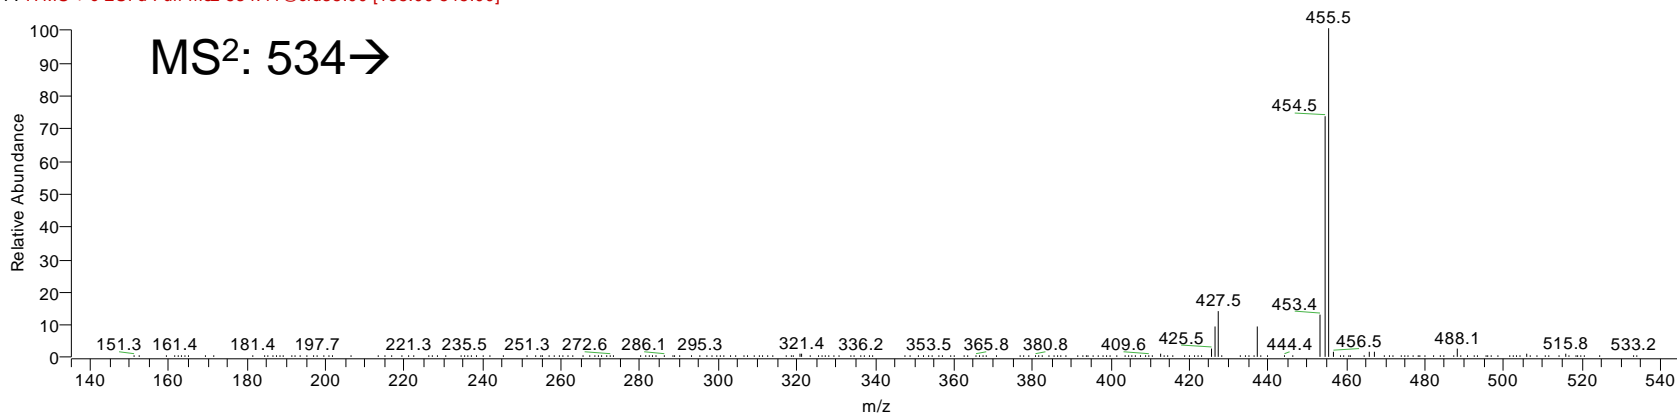

12 #884 RT: 7.44 AV: 1 NL: 2.07E6  
F: ITMS + c ESI d Full ms2 534.41@cid35.00 [135.00-545.00]

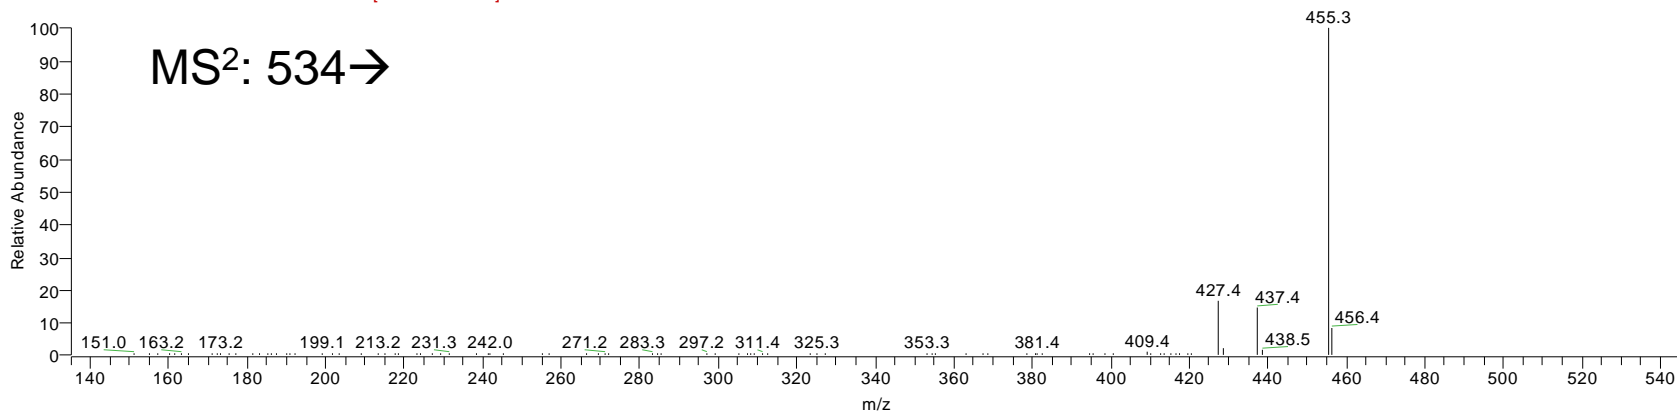

**Fig. S4v**

**C<sup>4</sup>-25-ol-3-one 3-GP**

CTX\_UFR2\_FR1\_2

30/06/2006 18:49:40

CTX\_UFR2\_FR1\_2 #907 RT: 7.42 AV: 1 NL: 3.51E3  
F: ITMS + c ESI d Full ms3 534.41@cid35.00 455.33@cid35.00 [115.00-470.00]

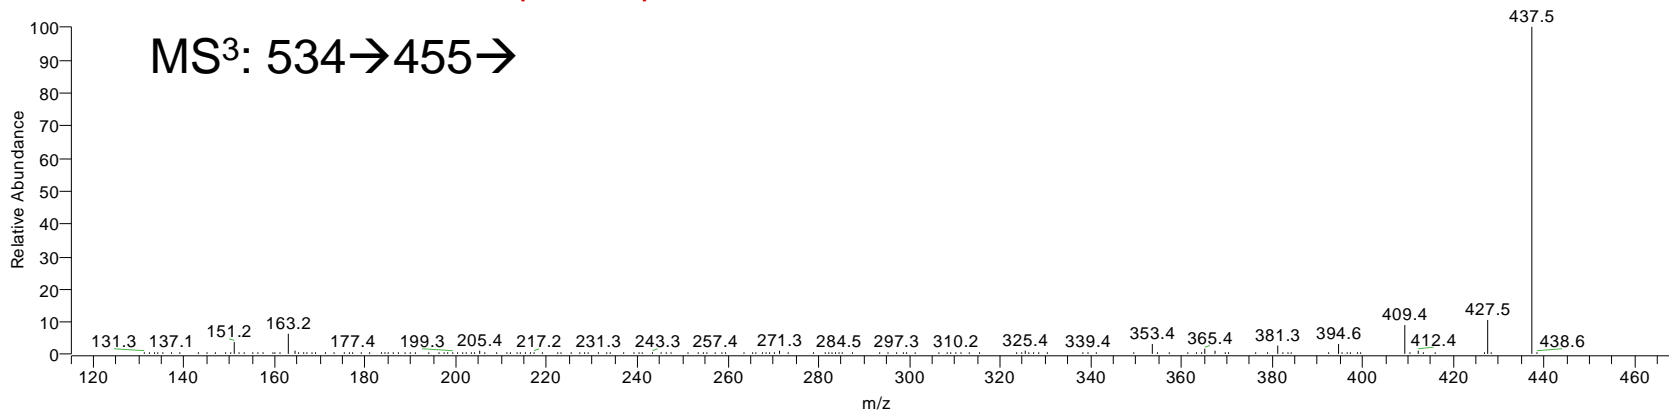

12 #885 RT: 7.44 AV: 1 NL: 1.43E6  
F: ITMS + c ESI d Full ms3 534.41@cid35.00 455.30@cid35.00 [115.00-470.00]

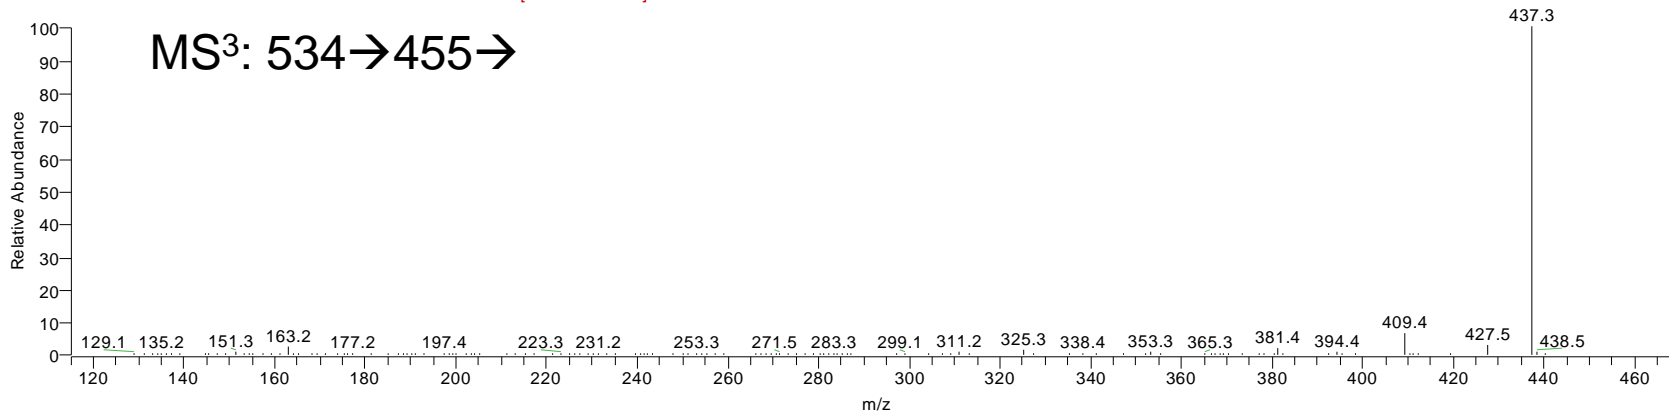

**Fig. S4w**

**C<sup>4</sup>-27-ol-3-one 3-GP**

CTX\_UFR2\_FR1\_2

30/06/2006 18:49:40

CTX\_UFR2\_FR1\_2 #1028 RT: 8.41 AV: 1 NL: 4.48E3  
F: ITMS + c ESI d Full ms<sup>2</sup> 534.41@cid35.00 [135.00-1080.00]

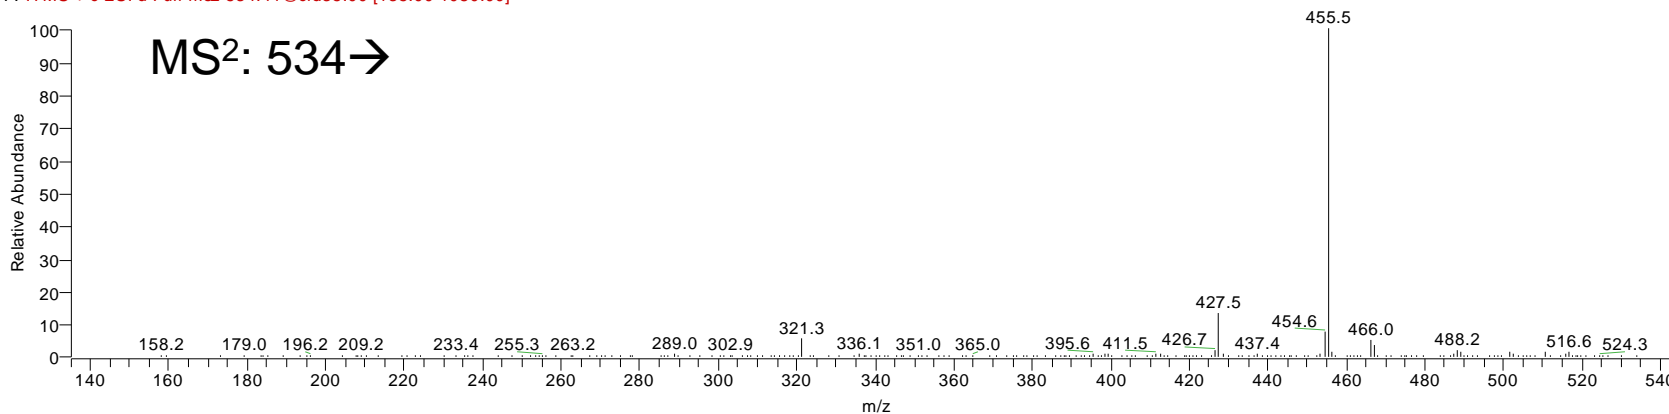

sample\_14 #828 RT: 8.13 AV: 1 NL: 3.77E5  
F: ITMS + c ESI d Full ms<sup>2</sup> 534.40@cid30.00 [135.00-545.00]

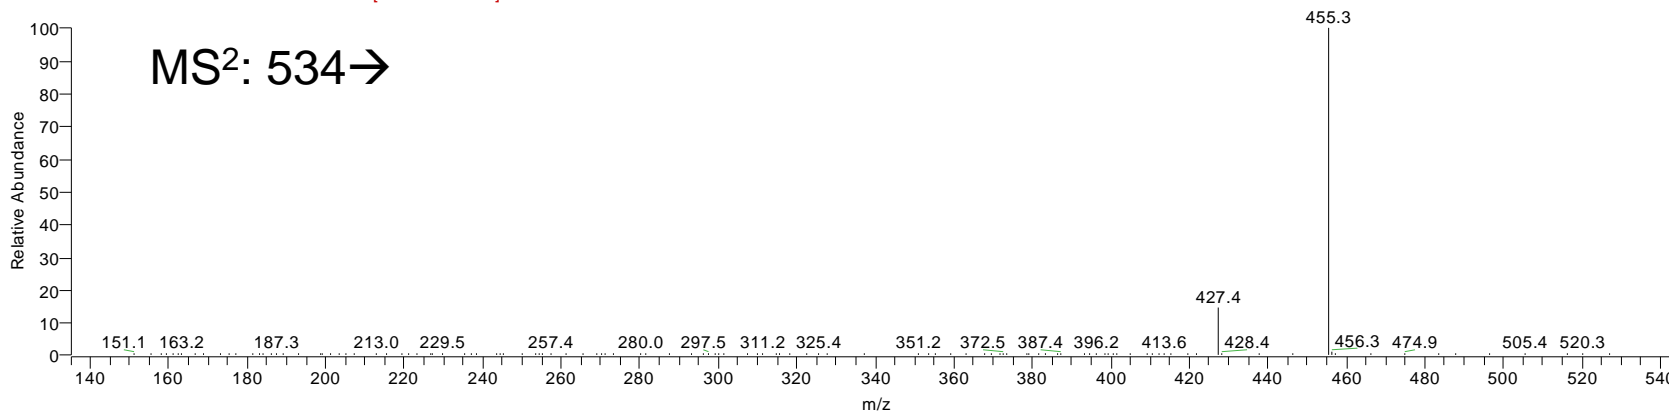

**Fig. S4x**

**C<sup>4</sup>-27-ol-3-one 3-GP**

CTX\_UFR2\_FR1\_2

30/06/2006 18:49:40

CTX\_UFR2\_FR1\_2 #1029 RT: 8.42 AV: 1 NL: 2.73E2  
F: ITMS + c ESI d Full ms3 534.41@cid35.00 455.35@cid35.00 [115.00-925.00]

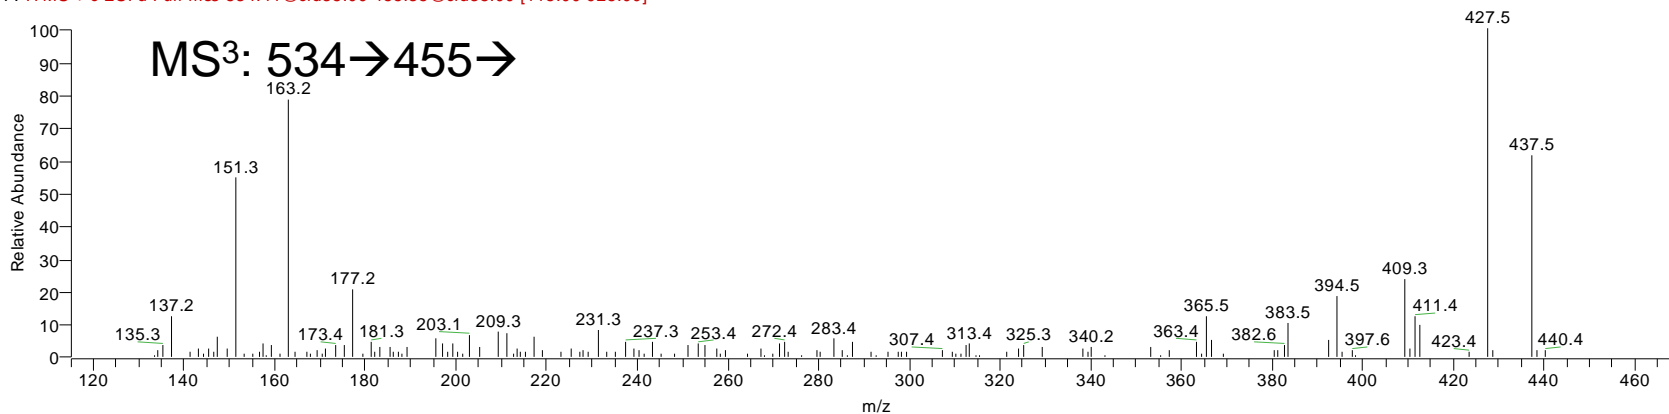

sample\_14 #829 RT: 8.13 AV: 1 NL: 3.36E4  
F: ITMS + c ESI d Full ms3 534.40@cid30.00 455.44@cid35.00 [115.00-470.00]

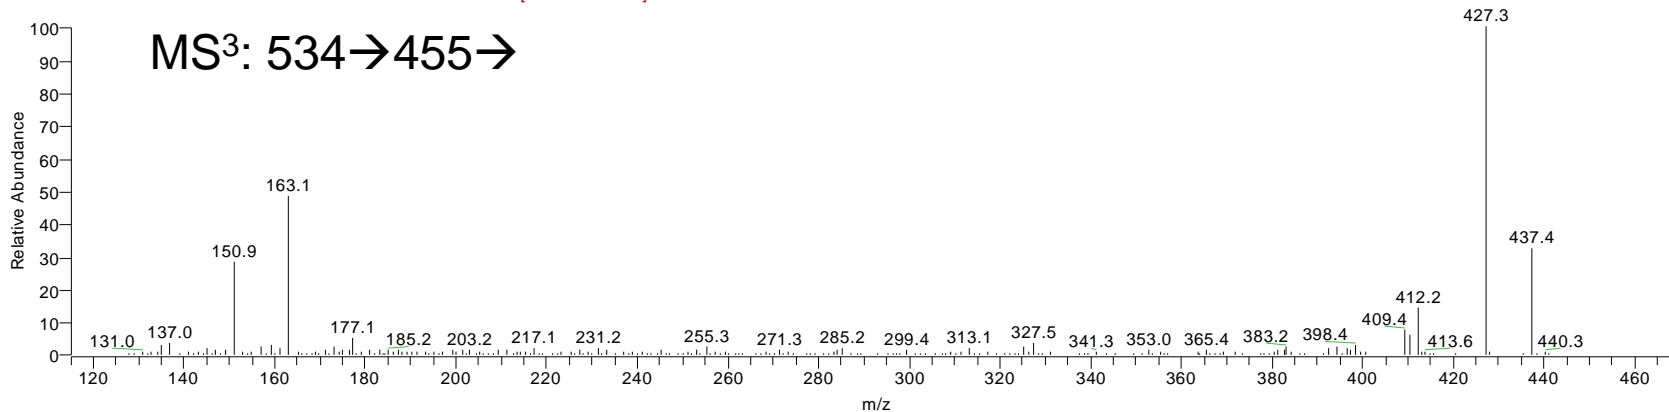

**Fig. S4y**

# C<sup>4</sup>-7 $\beta$ -ol-3-one 3-GP

CTX\_UFR2\_FR1\_2

30/06/2006 18:49:40

CTX\_UFR2\_FR1\_2 #1109 RT: 9.07 AV: 1 NL: 4.23E4  
F: ITMS + c ESI d Full ms2 534.41@cid35.00 [135.00-545.00]

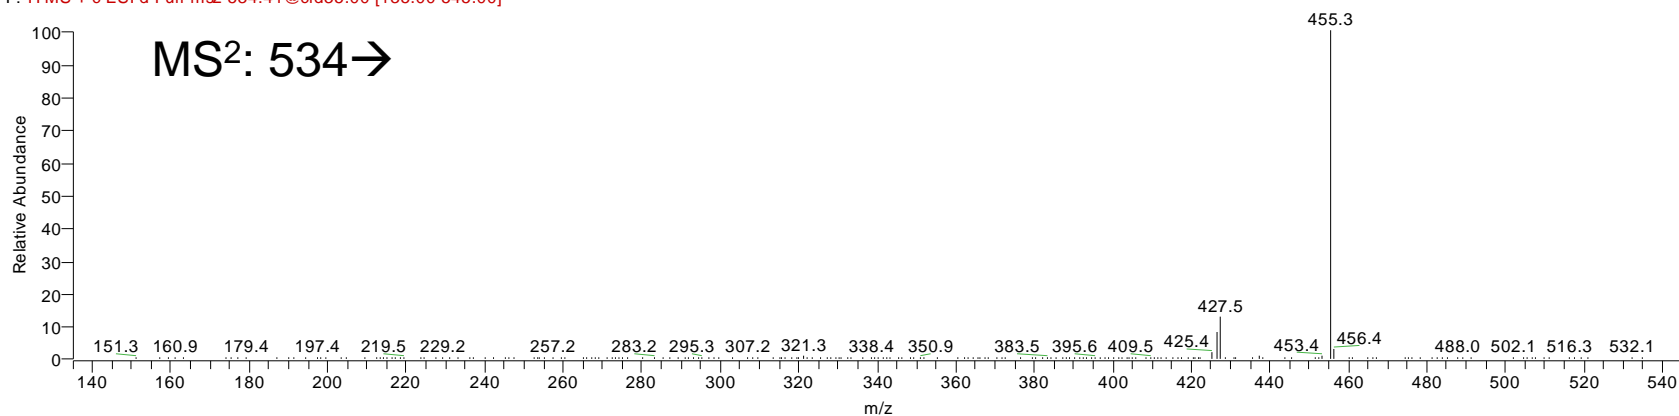

5 #1100 RT: 9.25 AV: 1 NL: 1.34E5  
F: ITMS + c ESI d Full ms2 534.41@cid35.00 [135.00-545.00]

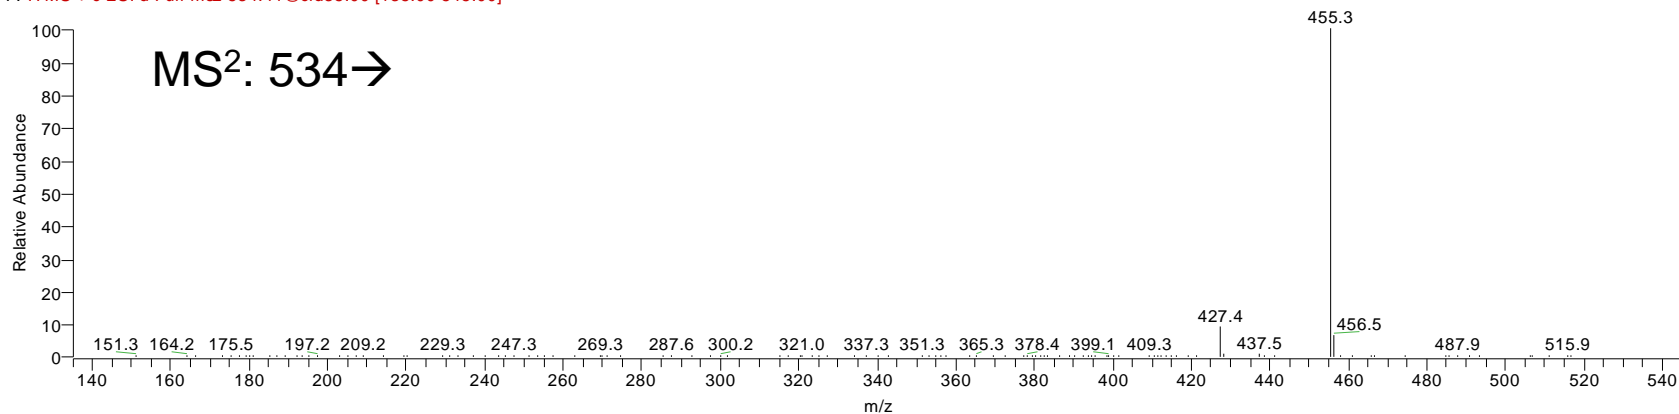

**Fig. S4z**

**C<sup>4</sup>-7 $\beta$ -ol-3-one 3-GP**

CTX\_UFR2\_FR1\_2

30/06/2006 18:49:40

CTX\_UFR2\_FR1\_2 #1110 RT: 9.08 AV: 1 NL: 4.69E3  
F: ITMS + c ESI d Full ms3 534.41@cid35.00 455.33@cid35.00 [115.00-470.00]

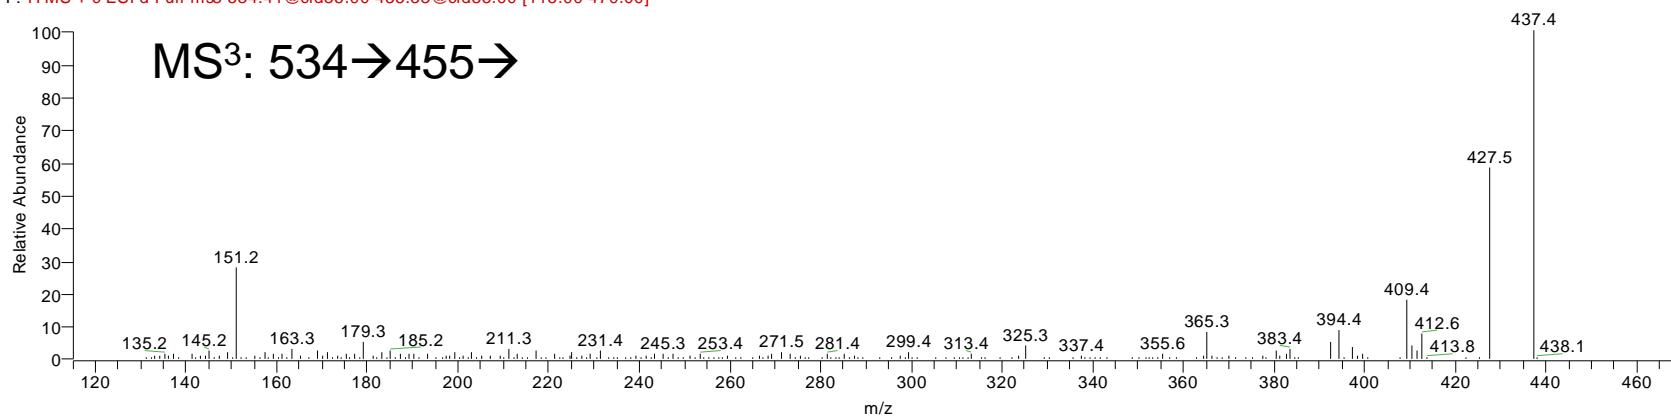

5 #1101 RT: 9.25 AV: 1 NL: 1.31E4  
F: ITMS + c ESI d Full ms3 534.41@cid35.00 455.34@cid35.00 [115.00-470.00]

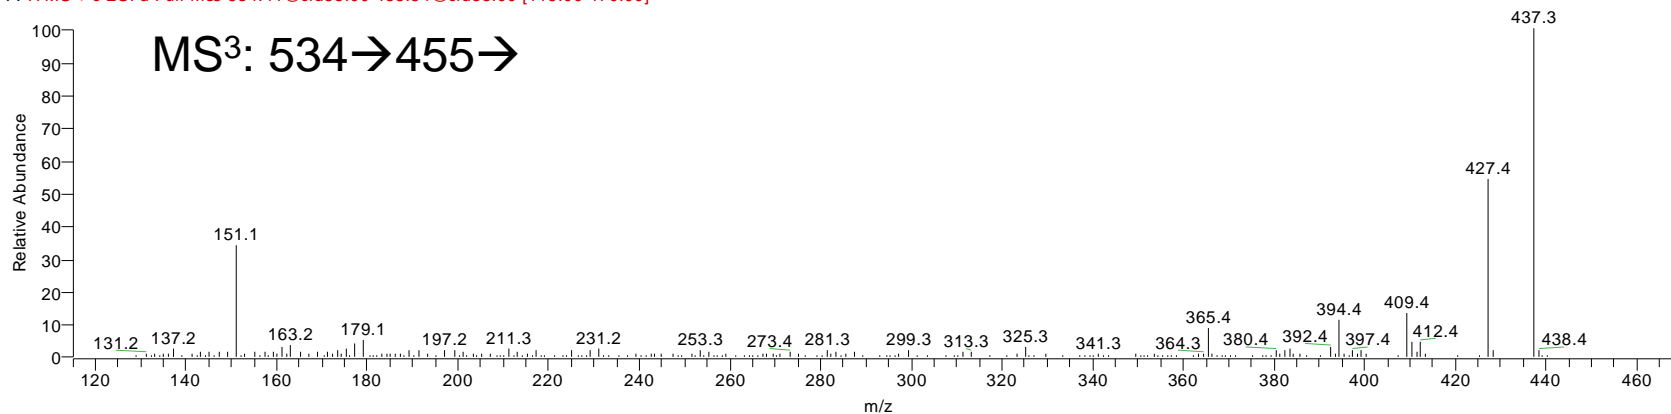

**Fig. S4aa**

**C<sup>4</sup>-7 $\alpha$ -ol-3-one 3-GP**

CTX\_UFR2\_FR1\_2

30/06/2006 18:49:40

CTX\_UFR2\_FR1\_2 #1178 RT: 9.60 AV: 1 NL: 7.25E4  
F: ITMS + c ESI d Full ms<sup>2</sup> 534.41@cid35.00 [135.00-545.00]

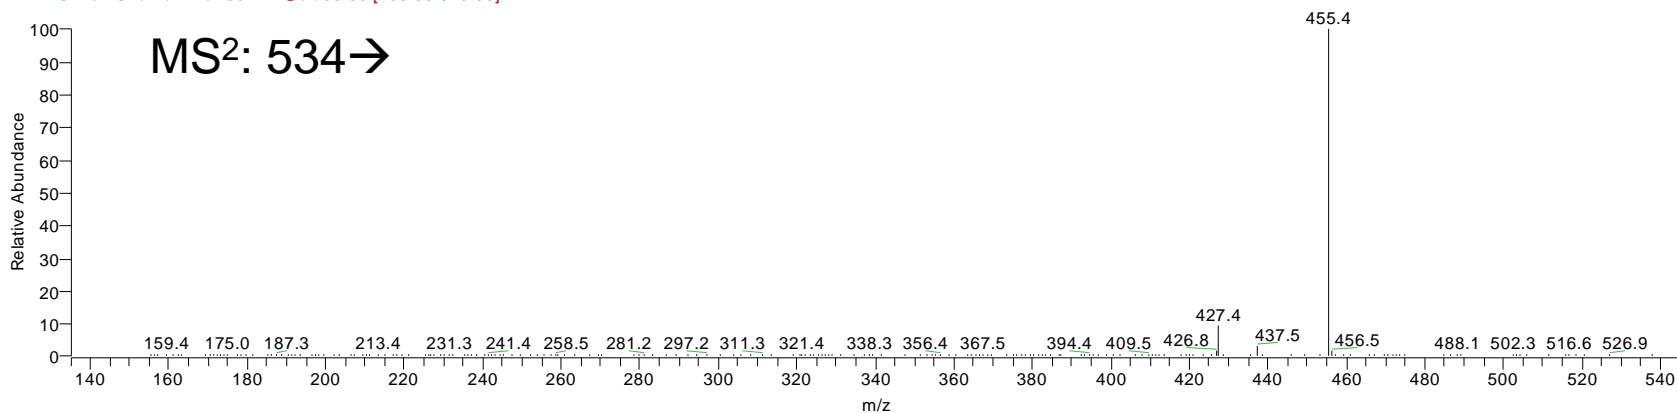

sample\_20 #1015 RT: 10.06 AV: 1 NL: 2.85E5  
F: ITMS + c ESI d Full ms<sup>2</sup> 534.41@cid30.00 [135.00-545.00]

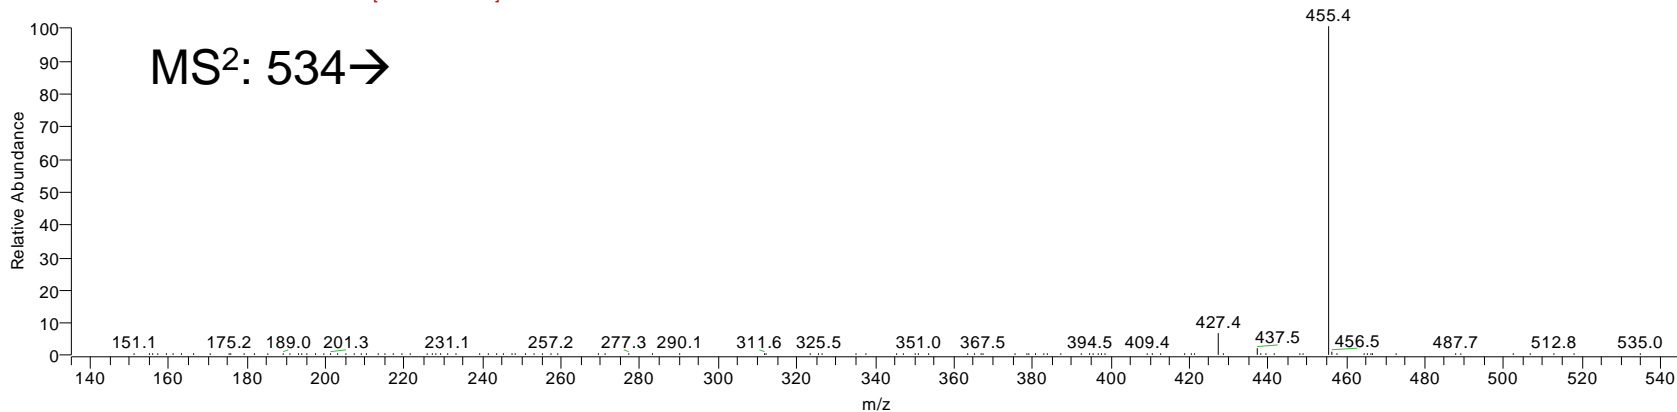



**Fig. S4ab**

**C<sup>4</sup>-7 $\alpha$ -ol-3-one 3-GP**

CTX\_UFR2\_FR1\_2

30/06/2006 18:49:40

CTX\_UFR2\_FR1\_2 #1179 RT: 9.60 AV: 1 NL: 9.59E3  
F: ITMS + c ESI d Full ms3 534.41@cid35.00 455.33@cid35.00 [115.00-470.00]

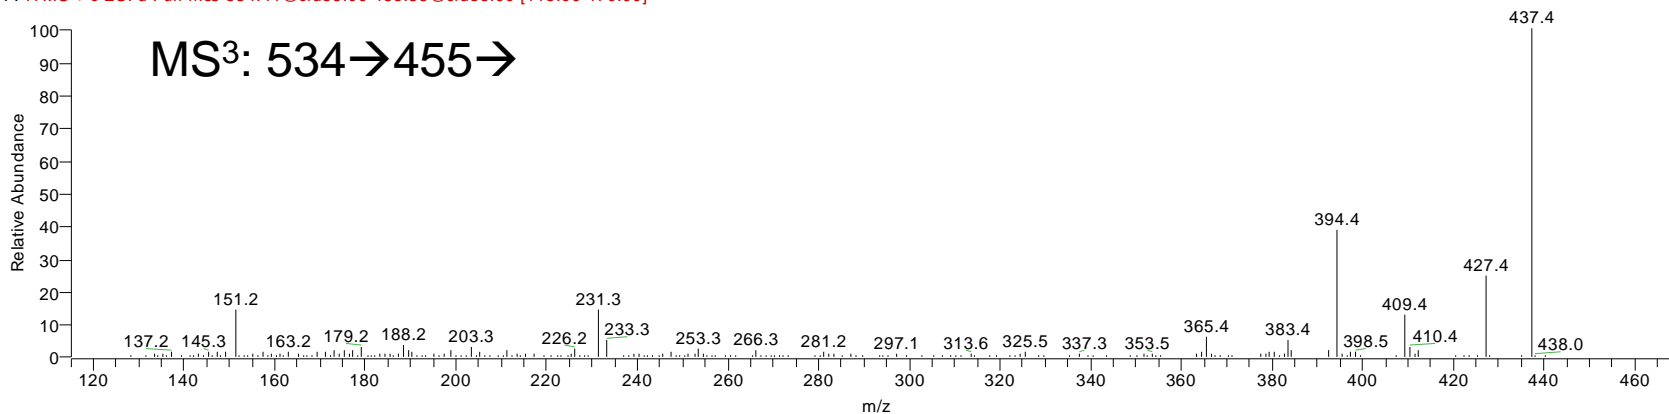

sample\_20 #1016 RT: 10.06 AV: 1 NL: 4.06E4  
F: ITMS + c ESI d Full ms3 534.41@cid30.00 455.29@cid35.00 [115.00-470.00]

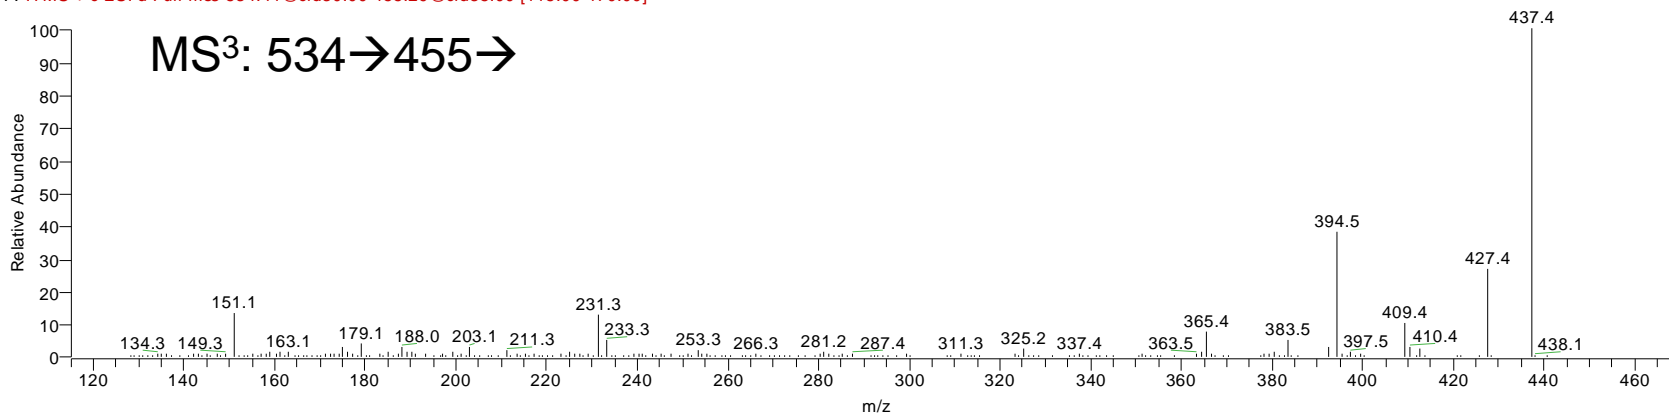

**Fig. S4ac**

C<sup>7</sup>-x-ol-3-one 3-GP

CTX\_UFR2\_FR1\_2

30/06/2006 18:49:40

CTX\_UFR2\_FR1\_2 #1198 RT: 9.75 AV: 1 NL: 4.31E4  
F: ITMS + c ESI d Full ms2 534.41 @cid35.00 [135.00-545.00]

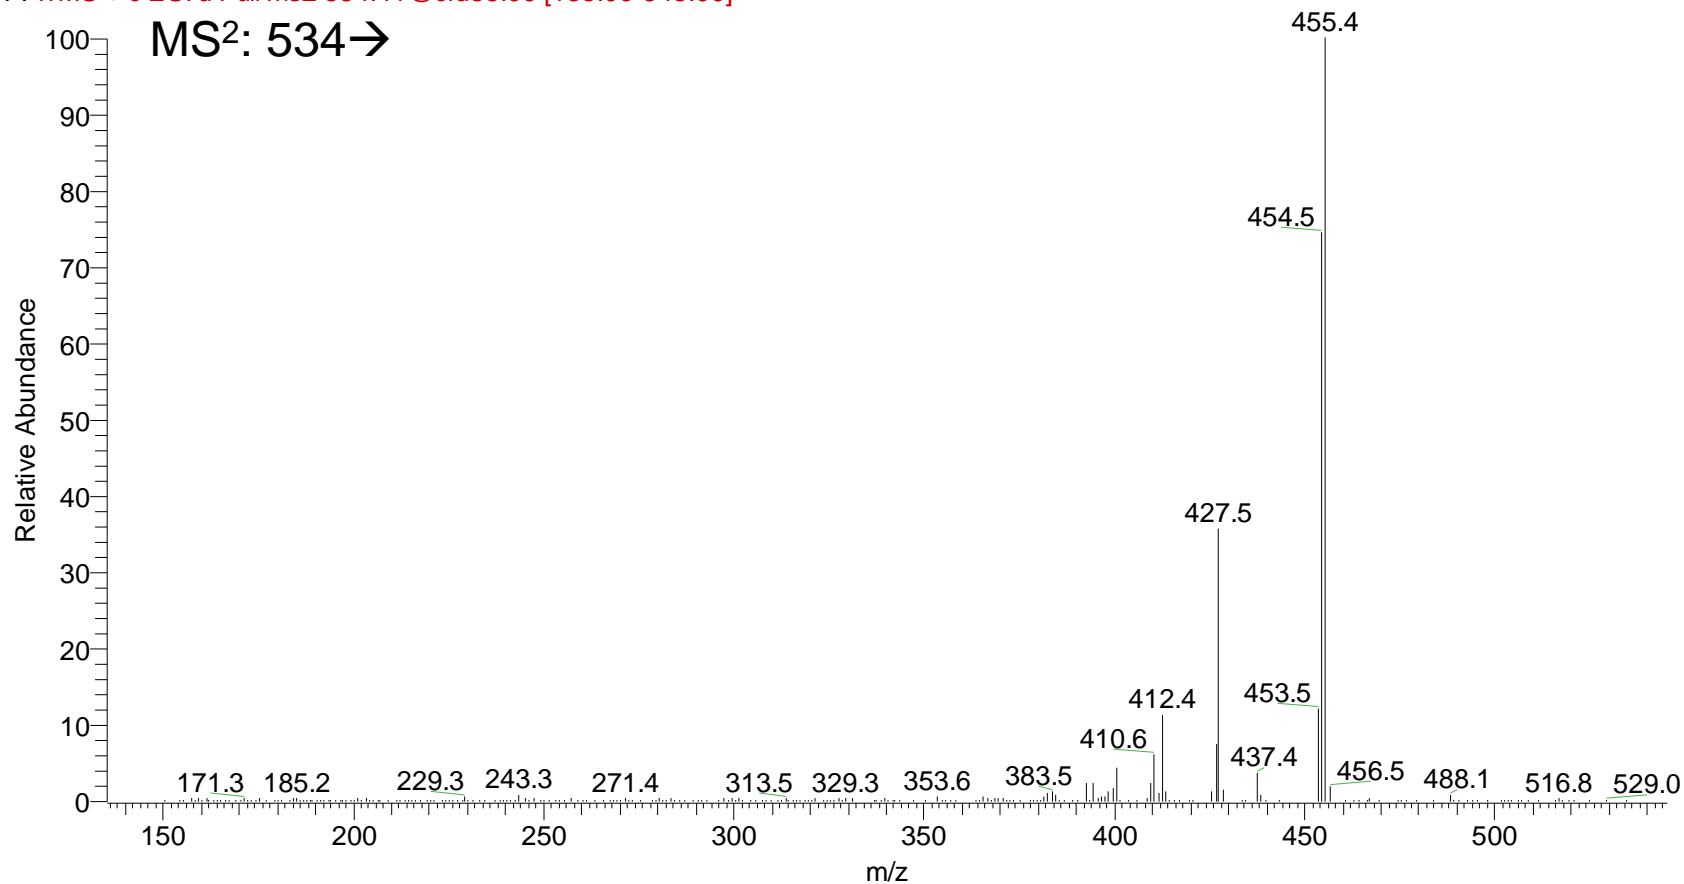

**Fig. S4ad**

**C<sup>7</sup>-x-ol-3-one 3-GP**

CTX\_UFR2\_FR1\_2

30/06/2006 18:49:40

CTX\_UFR2\_FR1\_2 #1199 RT: 9.75 AV: 1 NL: 1.41E4

F: ITMS + c ESI d Full ms3 534.41@cid35.00 455.33@cid35.00 [115.00-470.00]

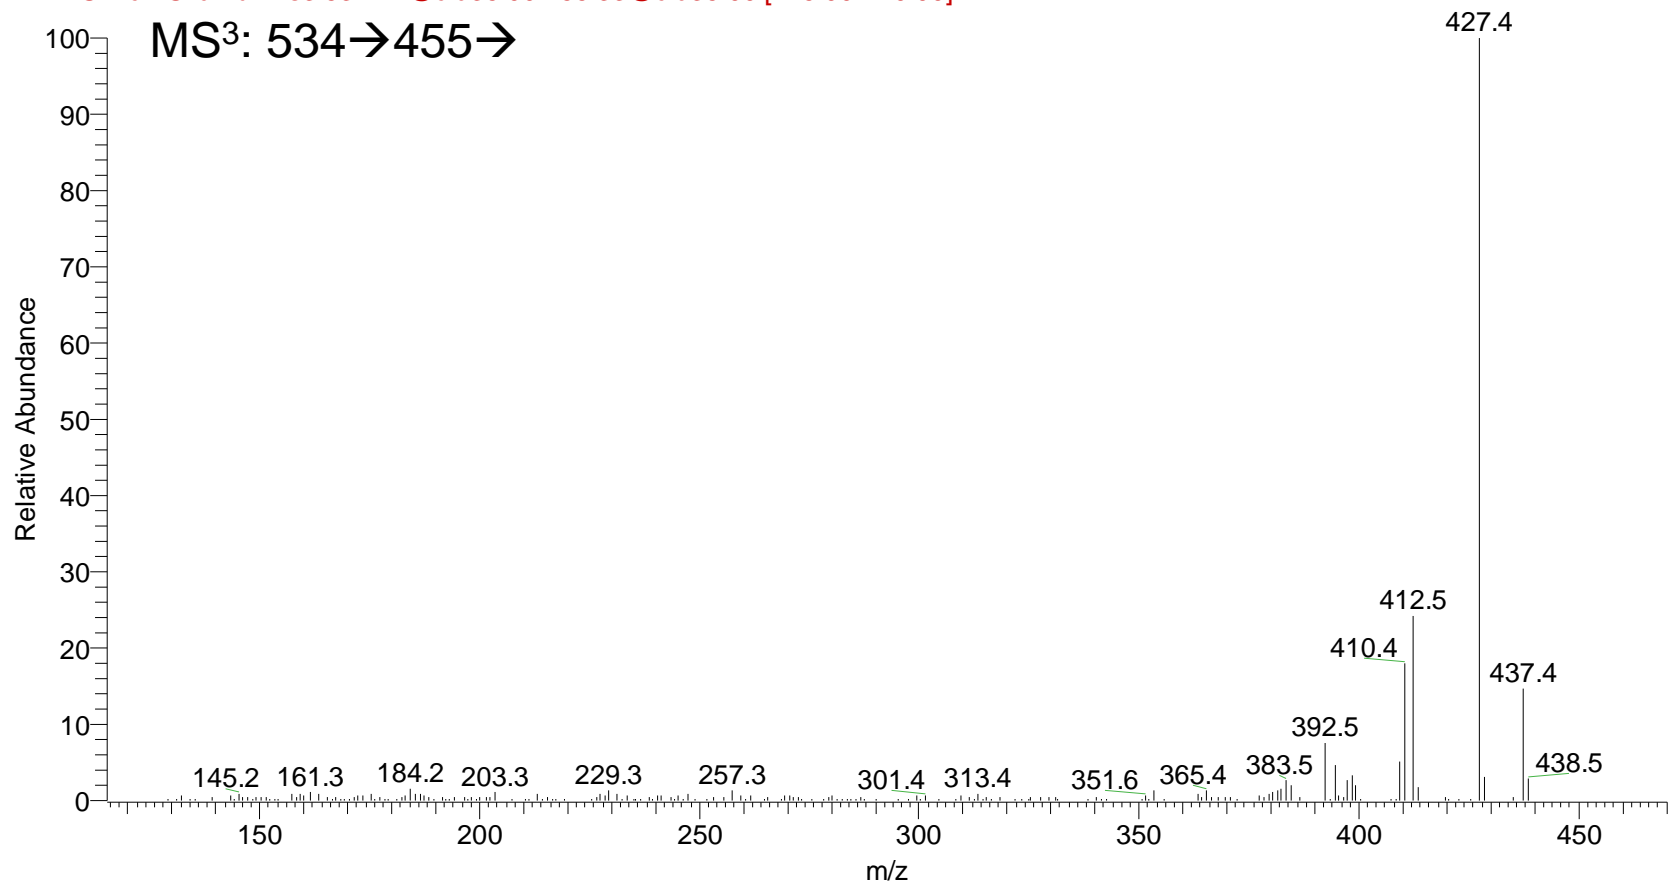

**Fig. S4ae**

**C<sup>4</sup>-6 $\beta$ -ol-3-one 3-GP**

CTX\_UFR2\_FR1\_2

30/06/2006 18:49:40

CTX\_UFR2\_FR1\_2 #1218 RT: 9.89 AV: 1 NL: 4.41E5  
F: ITMS + c ESI d Full ms<sup>2</sup> 534.41@cid35.00 [135.00-545.00]

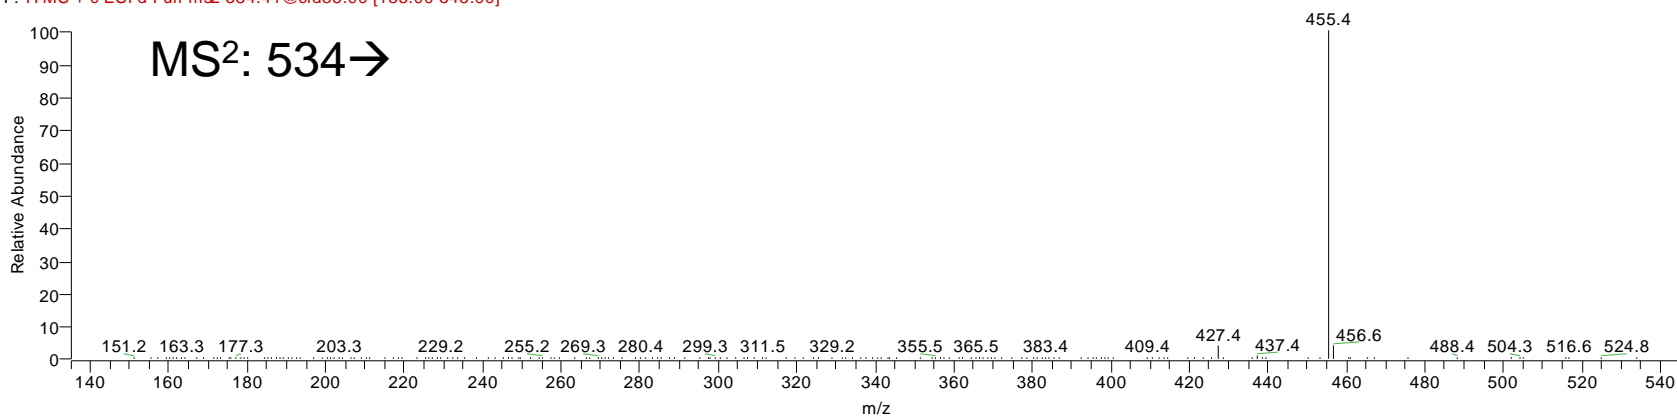

4 #1196 RT: 9.91 AV: 1 NL: 3.31E6  
F: ITMS + c ESI d Full ms<sup>2</sup> 534.41@cid35.00 [135.00-545.00]

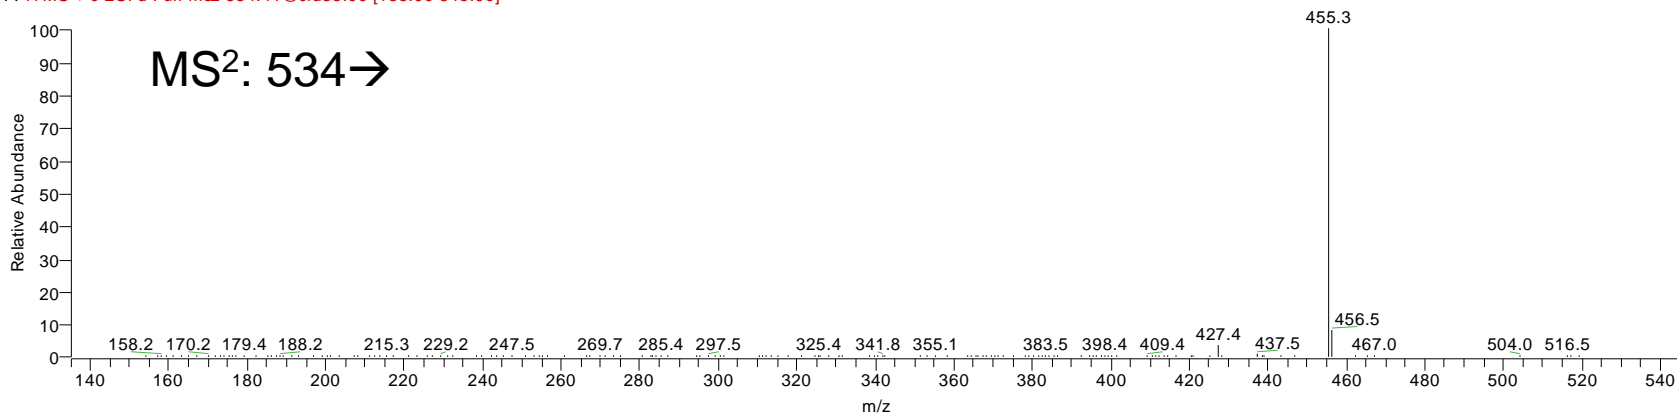

**Fig. S4af**

**C<sup>4</sup>-6 $\beta$ -ol-3-one 3-GP**

CTX\_UFR2\_FR1\_2

30/06/2006 18:49:40

CTX\_UFR2\_FR1\_2 #1219 RT: 9.89 AV: 1 NL: 3.74E4  
F: ITMS + c ESI d Full ms3 534.41@cid35.00 455.33@cid35.00 [115.00-470.00]

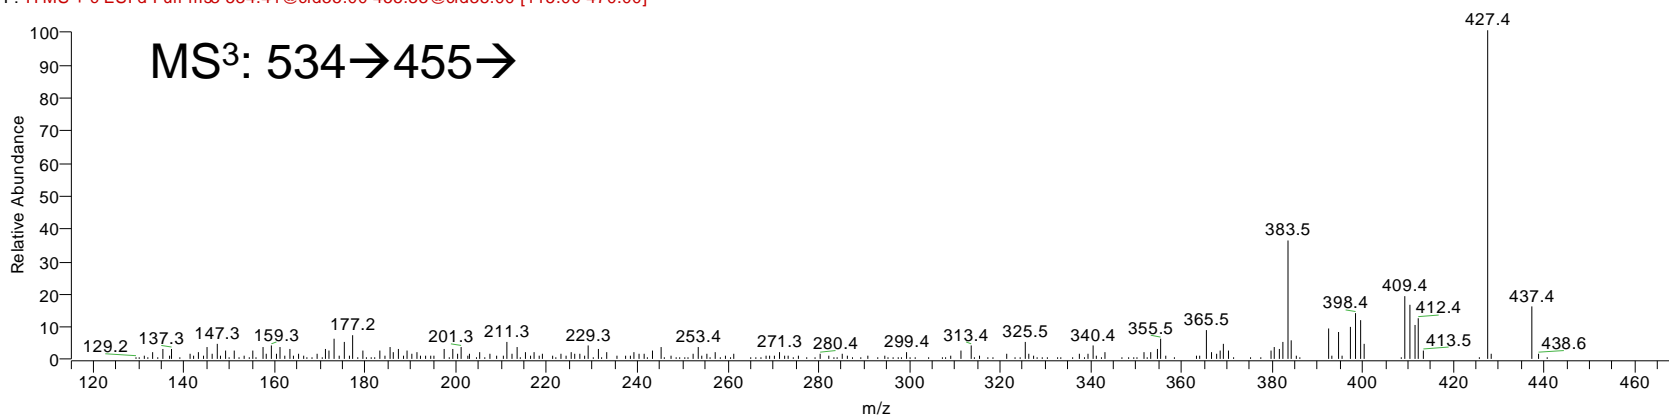

4 #1197 RT: 9.91 AV: 1 NL: 2.49E5  
F: ITMS + c ESI d Full ms3 534.41@cid35.00 455.32@cid35.00 [115.00-470.00]

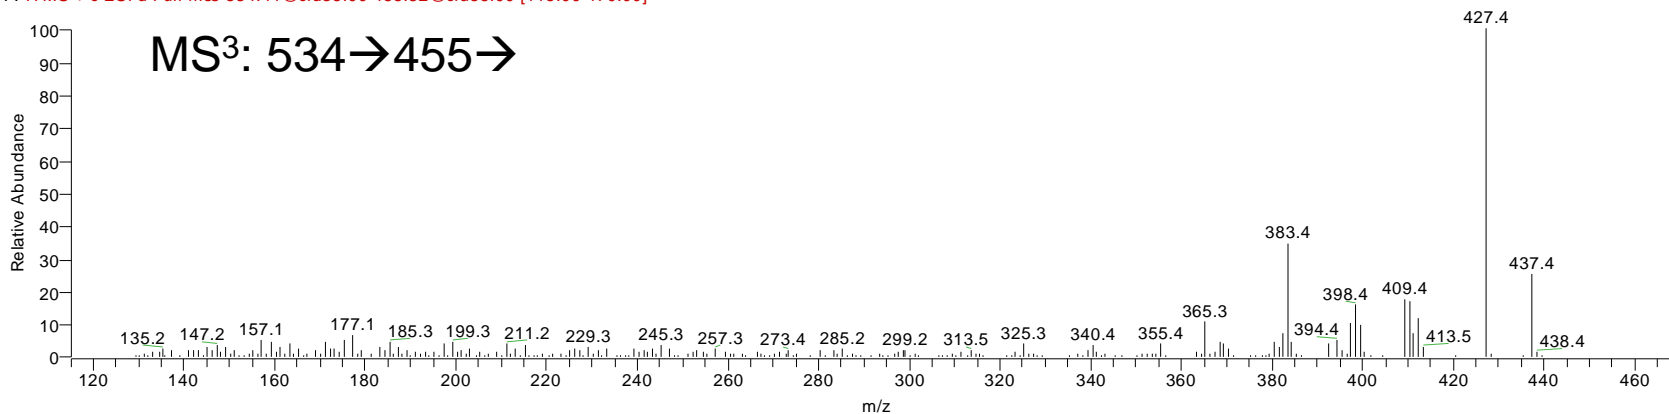

**Fig. S4ag**

C<sup>X,Y</sup>-x,y-diol-z-one z-GP

CTX\_UFR2\_FR1\_2

30/06/2006 18:49:40

CTX\_UFR2\_FR1\_2 #1201 RT: 9.76 AV: 1 NL: 1.80E3  
F: ITMS + c ESI d Full ms2 548.38@cid35.00 [140.00-560.00]

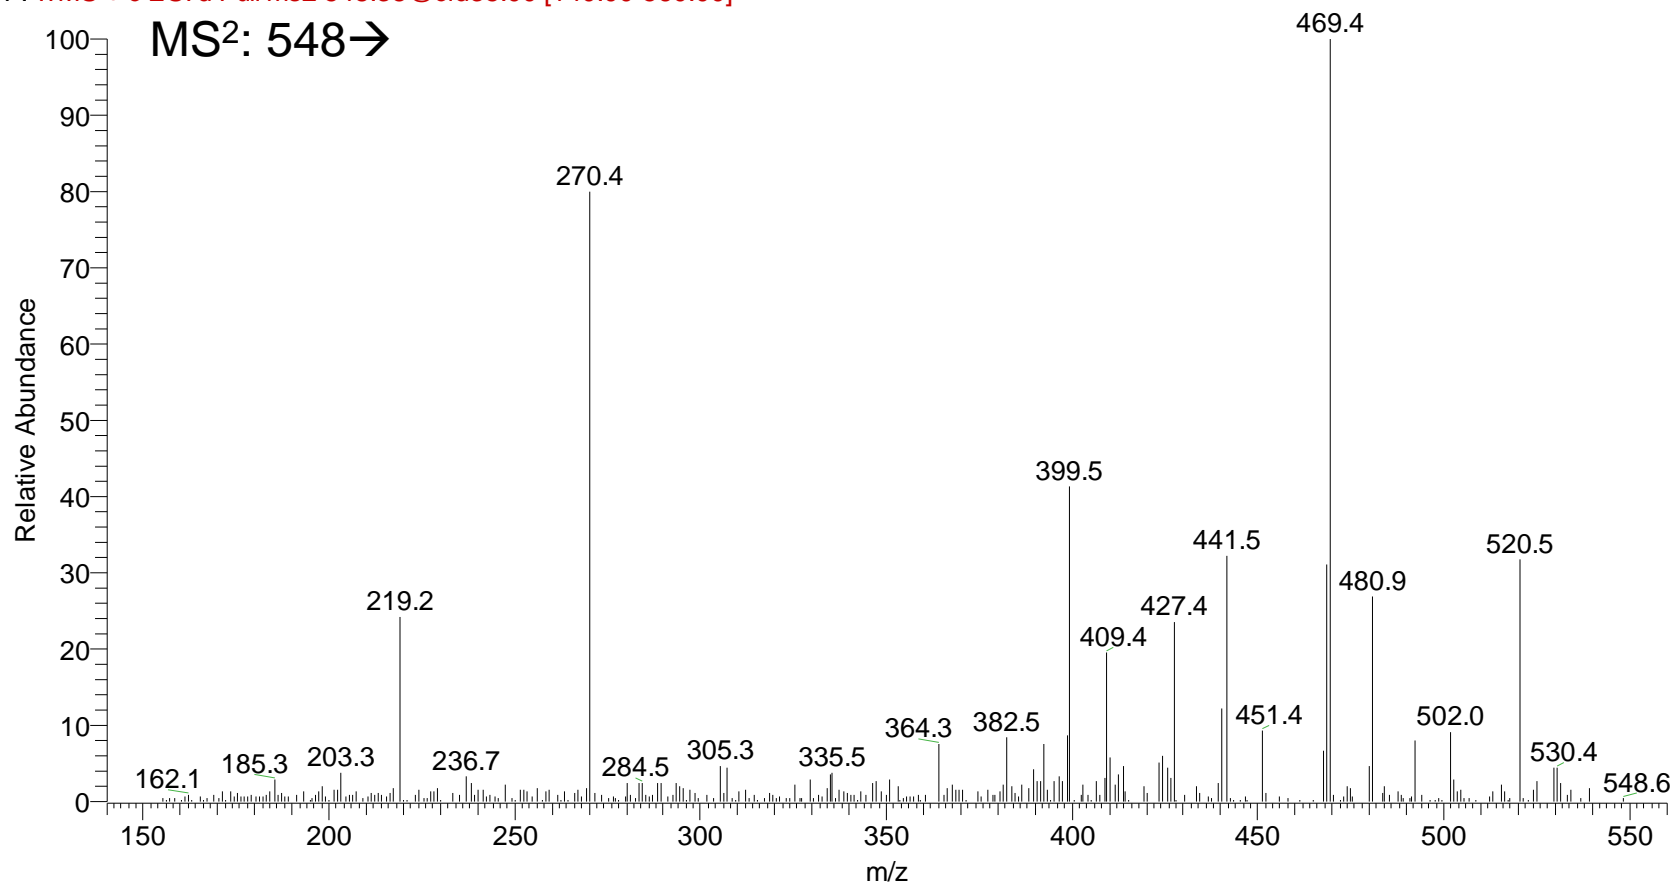

**Fig. S4ah**

**C<sup>X,Y</sup>-x,y-diol-z-one z-GP**

CTX\_UFR2\_FR1\_2

30/06/2006 18:49:40

CTX\_UFR2\_FR1\_2 #1202 RT: 9.77 AV: 1 NL: 2.59E2

F: ITMS + c ESI d Full ms3 548.38@cid35.00 469.37@cid35.00 [115.00-480.00]

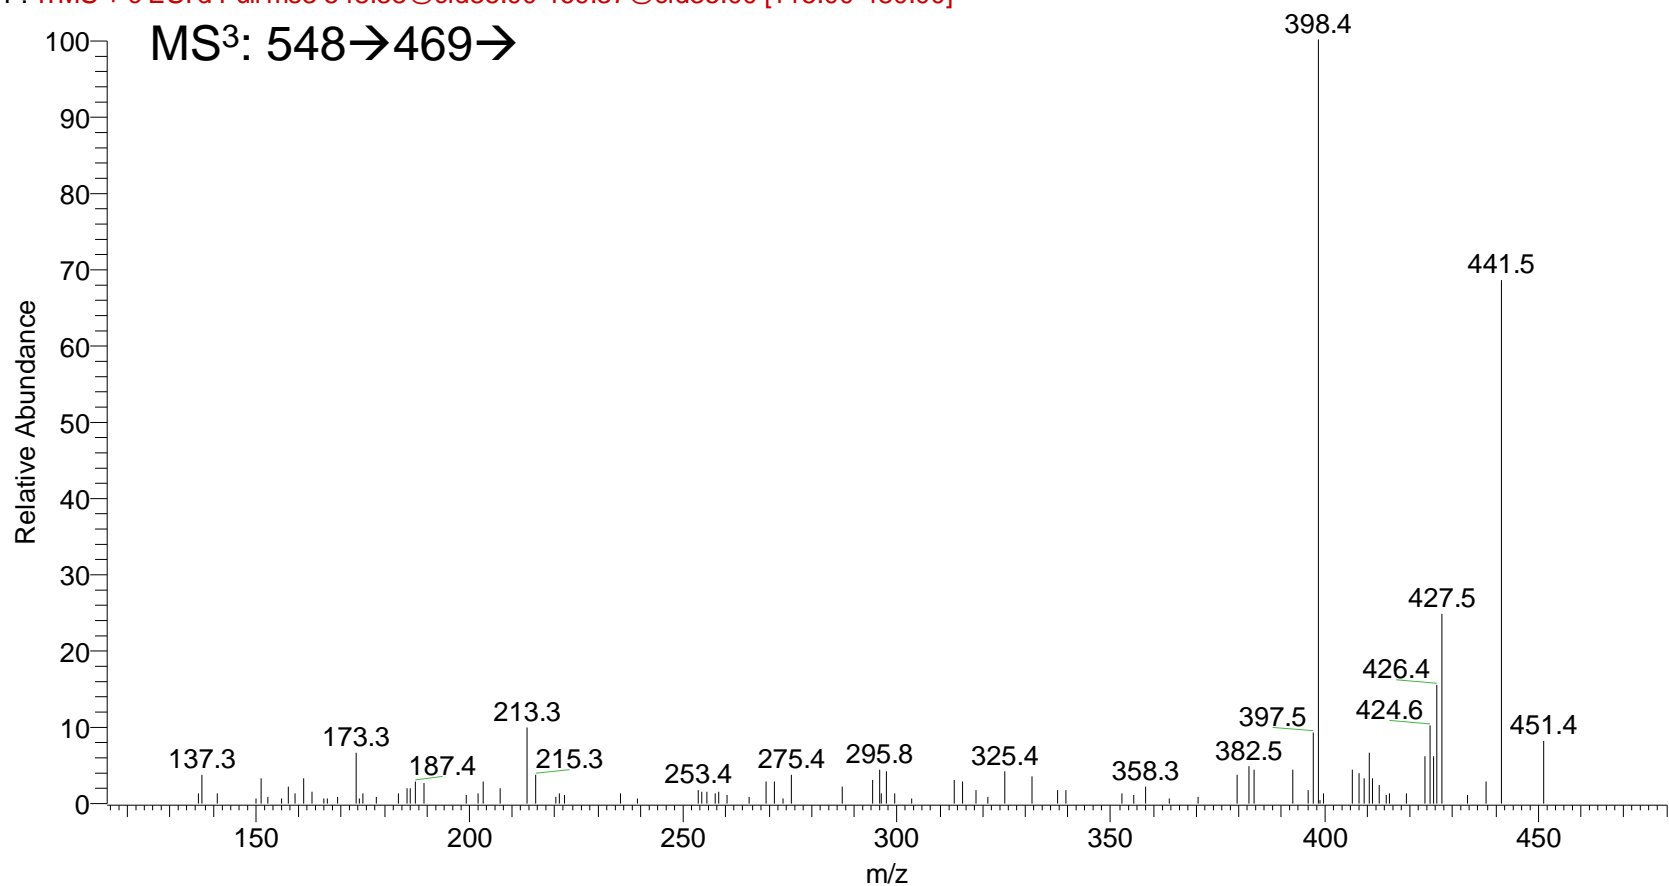

**Fig. S4ai**

**C<sup>X,Y</sup>-x,y-diol-z-one z-GP**

CTX\_UFR2\_FR1\_2

30/06/2006 18:49:40

CTX\_UFR2\_FR1\_2 #1242 RT: 10.06 AV: 1 NL: 5.20E2  
F: ITMS + c ESI d Full ms2 548.38@cid35.00 [140.00-1110.00]

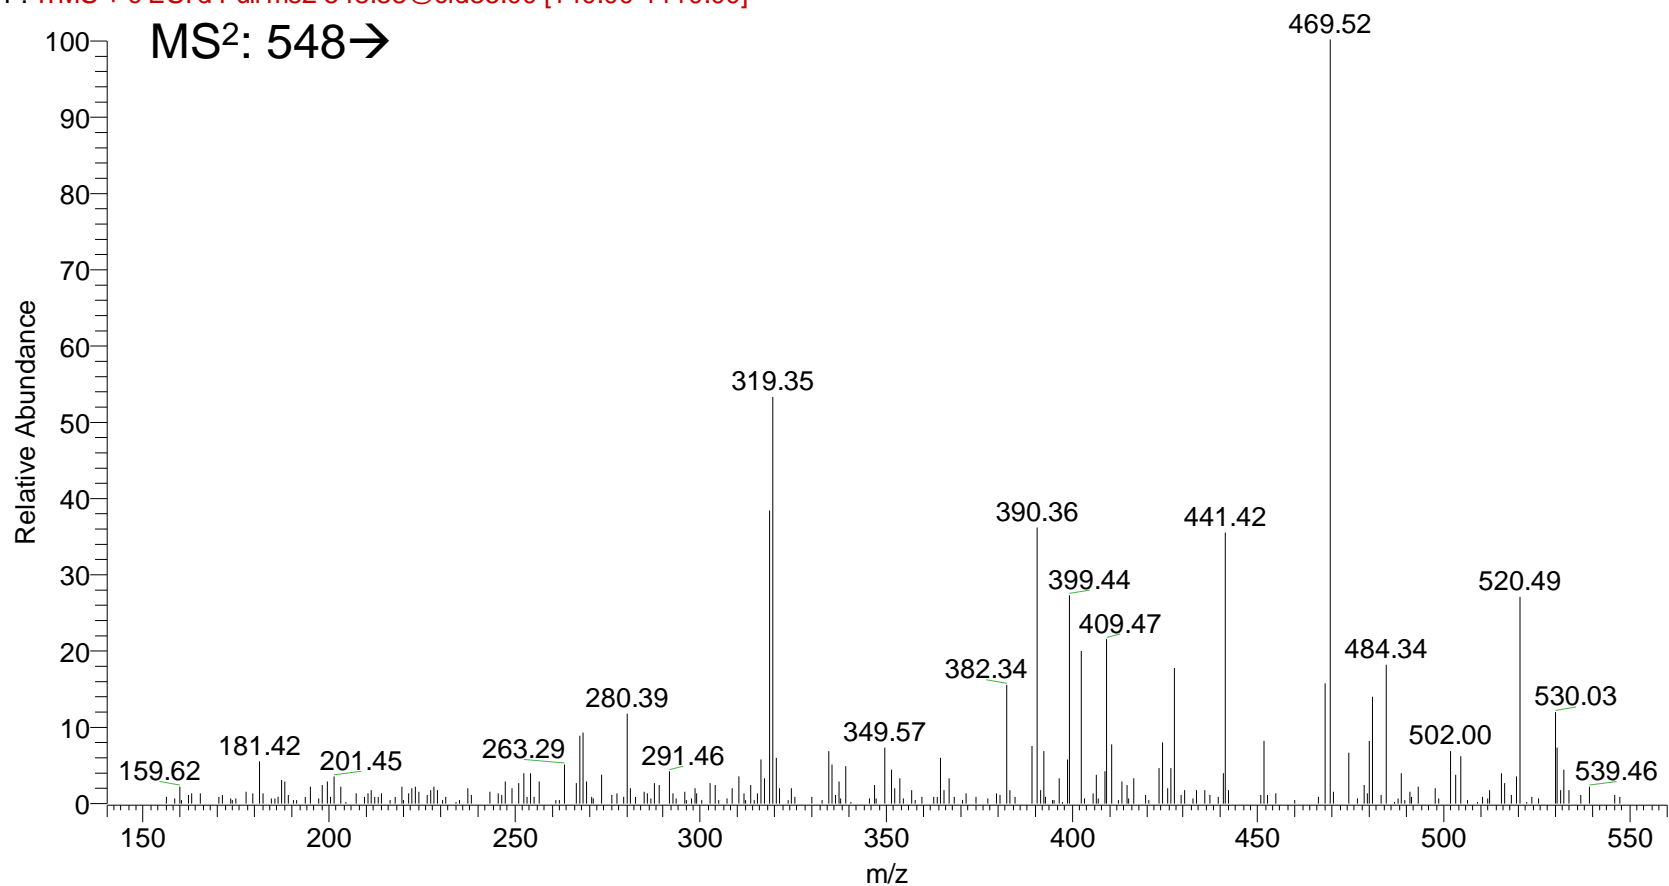



**Fig. S4aj**

**C<sup>X,Y</sup>-x,y-diol-z-one z-GP**

CTX\_UFR2\_FR1\_2

30/06/2006 18:49:40

CTX\_UFR2\_FR1\_2 #1243 RT: 10.07 AV: 1 NL: 5.82E1

F: ITMS + c ESI d Full ms3 548.38@cid35.00 469.37@cid35.00 [115.00-950.00]

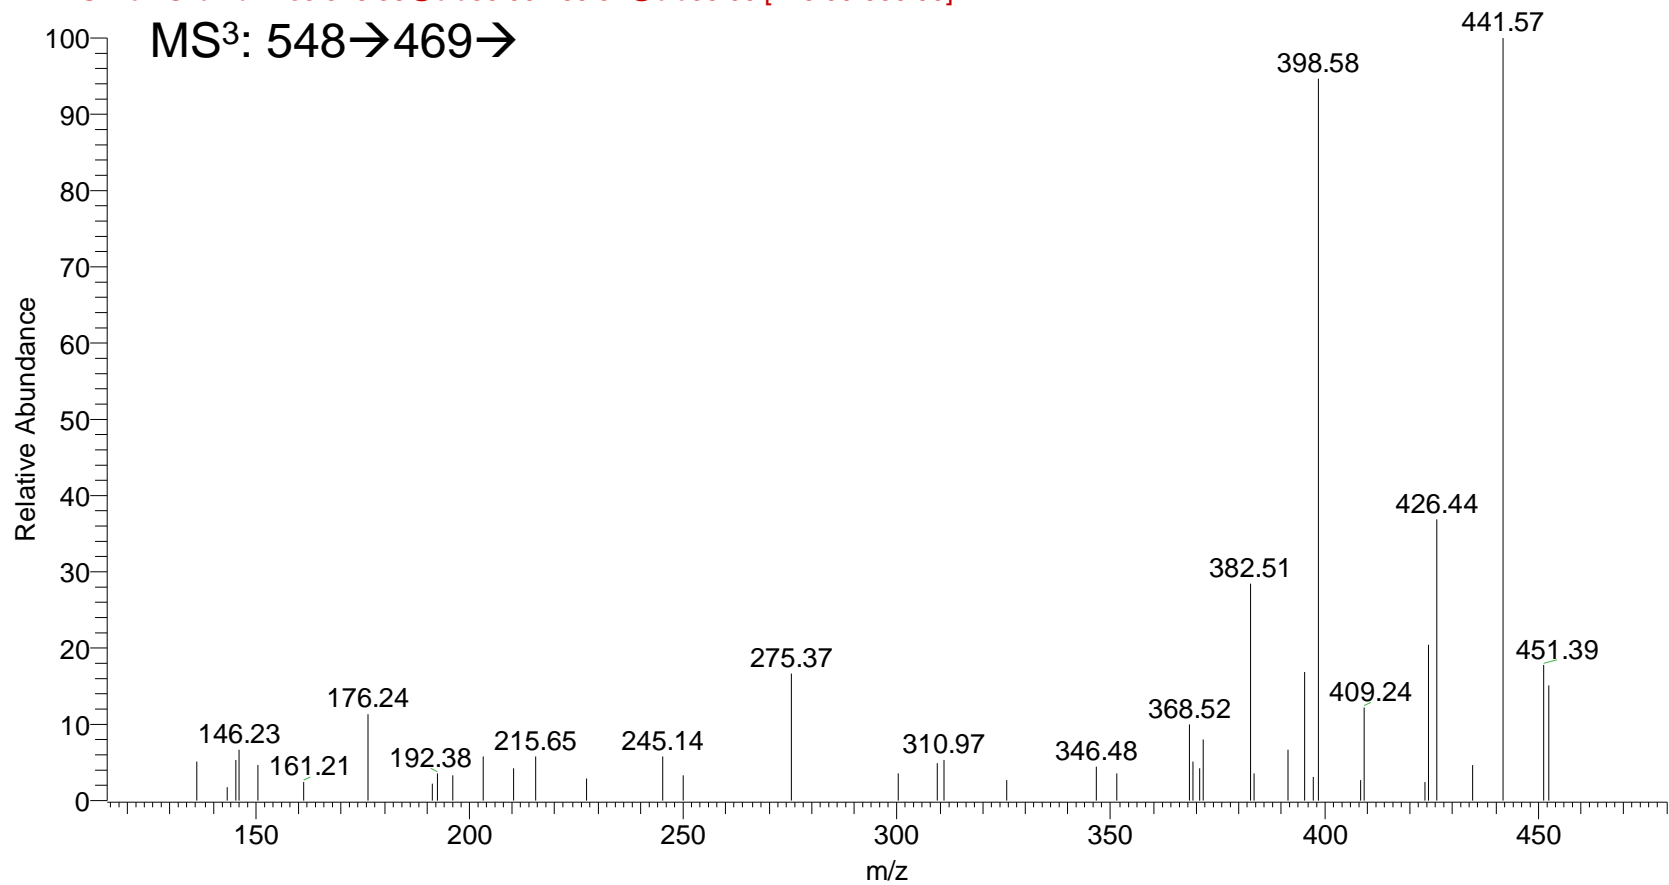

**Fig. S4ak**

**C<sup>4</sup>-24,25-diol-3-one 3-GP**

CTX\_UFR2\_FR1\_2

30/06/2006 18:49:40

CTX\_UFR2\_FR1\_2 #540 RT: 4.43 AV: 1 NL: 2.50E4  
F: ITMS + c ESI d Full ms2 550.40@cid35.00 [140.00-565.00]

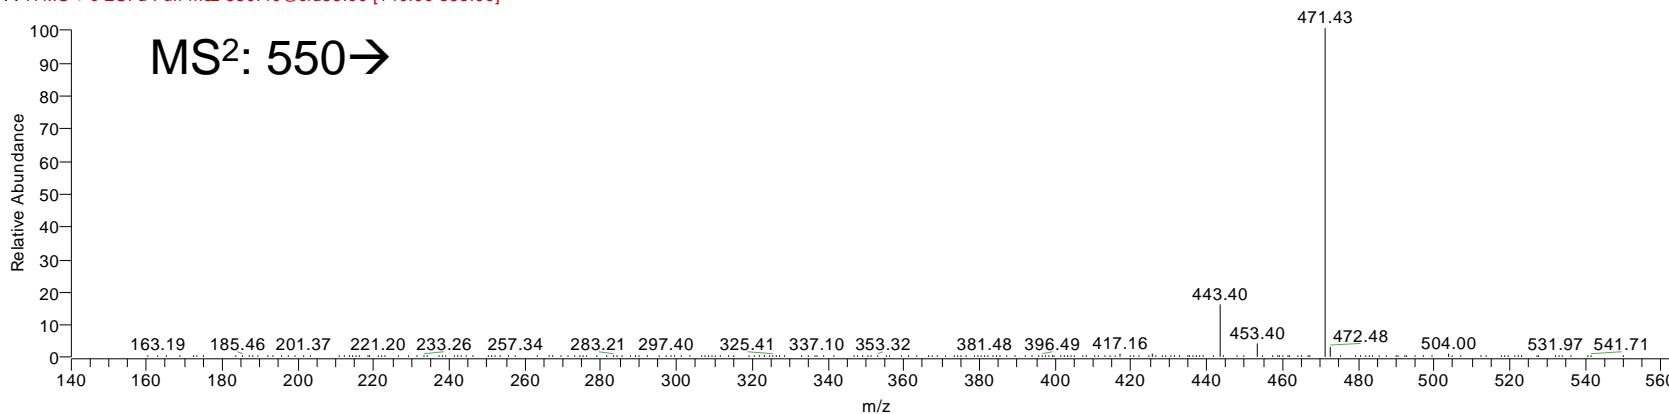

sample\_39 #467 RT: 4.72 AV: 1 NL: 8.53E4  
F: ITMS + c ESI d Full ms2 550.40@cid30.00 [140.00-565.00]

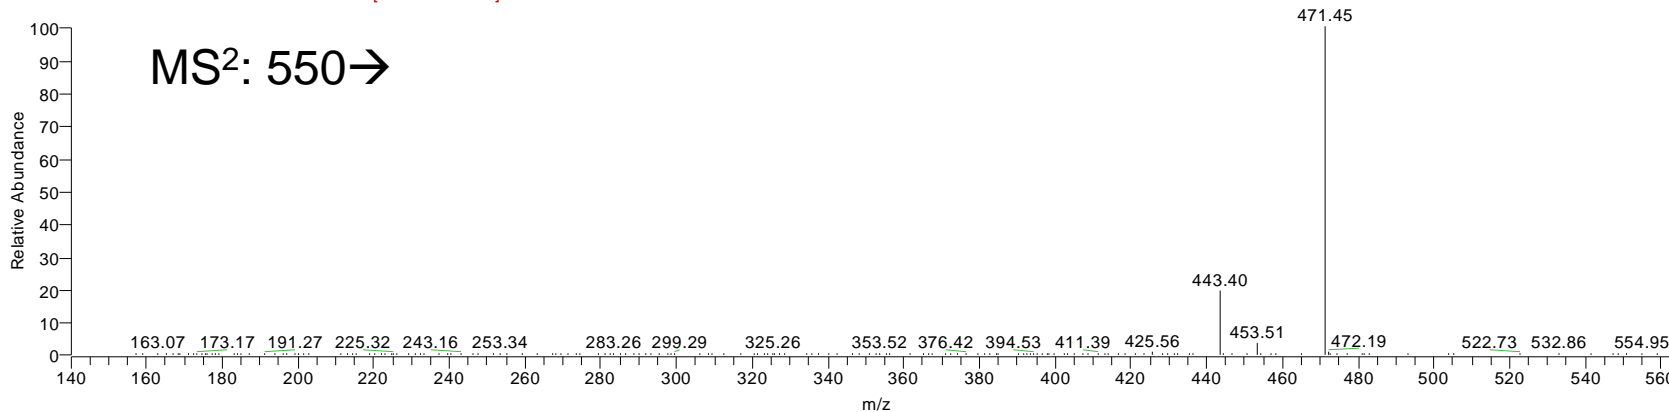

**Fig. S4a1**

# C<sup>4</sup>-24,25-diol-3-one 3-GP

CTX\_UFR2\_FR1\_2

30/06/2006 18:49:40

CTX\_UFR2\_FR1\_2 #541 RT: 4.44 AV: 1 NL: 4.76E3  
F: ITMS + c ESI d Full ms3 550.40@cid35.00 471.39@cid35.00 [115.00-485.00]

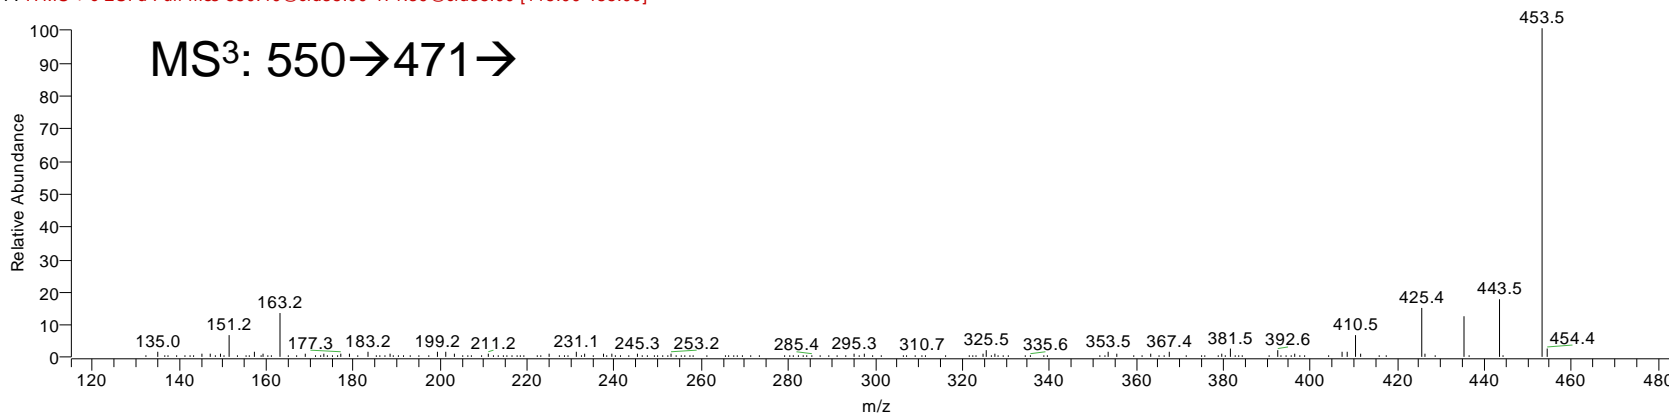

sample\_39 #468 RT: 4.72 AV: 1 NL: 1.88E4  
F: ITMS + c ESI d Full ms3 550.40@cid30.00 471.47@cid35.00 [115.00-485.00]

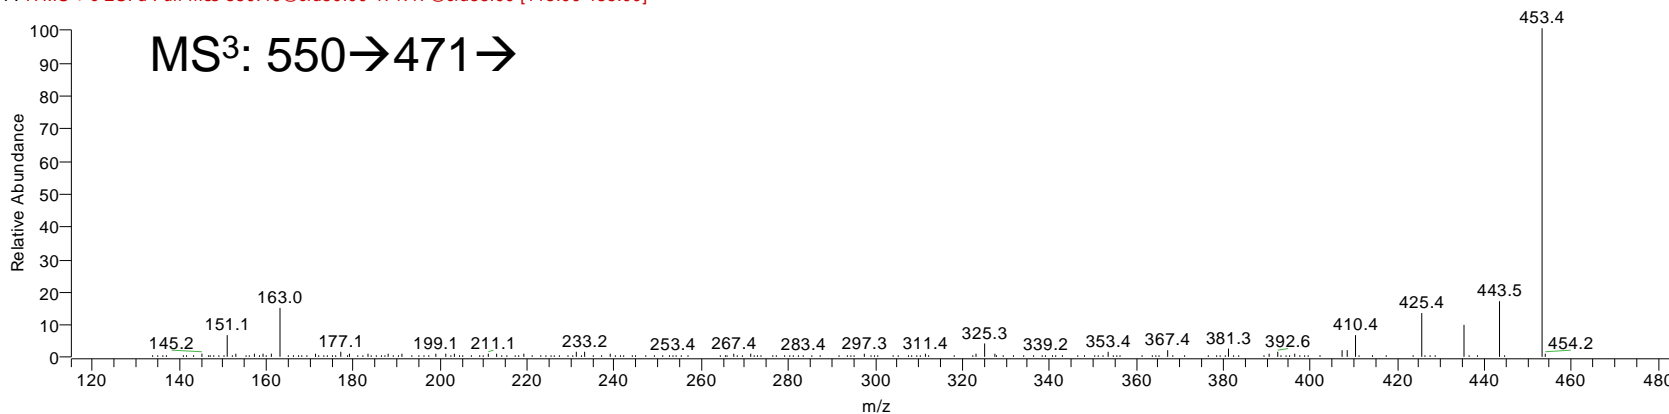

**Fig. S4am**

**C<sup>4</sup>-24,27-diol-3-one 3-GP**

CTX\_UFR2\_FR1\_2

30/06/2006 18:49:40

CTX\_UFR2\_FR1\_2 #589 RT: 4.84 AV: 1 NL: 1.08E4  
F: ITMS + c ESI d Full ms2 550.40@cid35.00 [140.00-565.00]

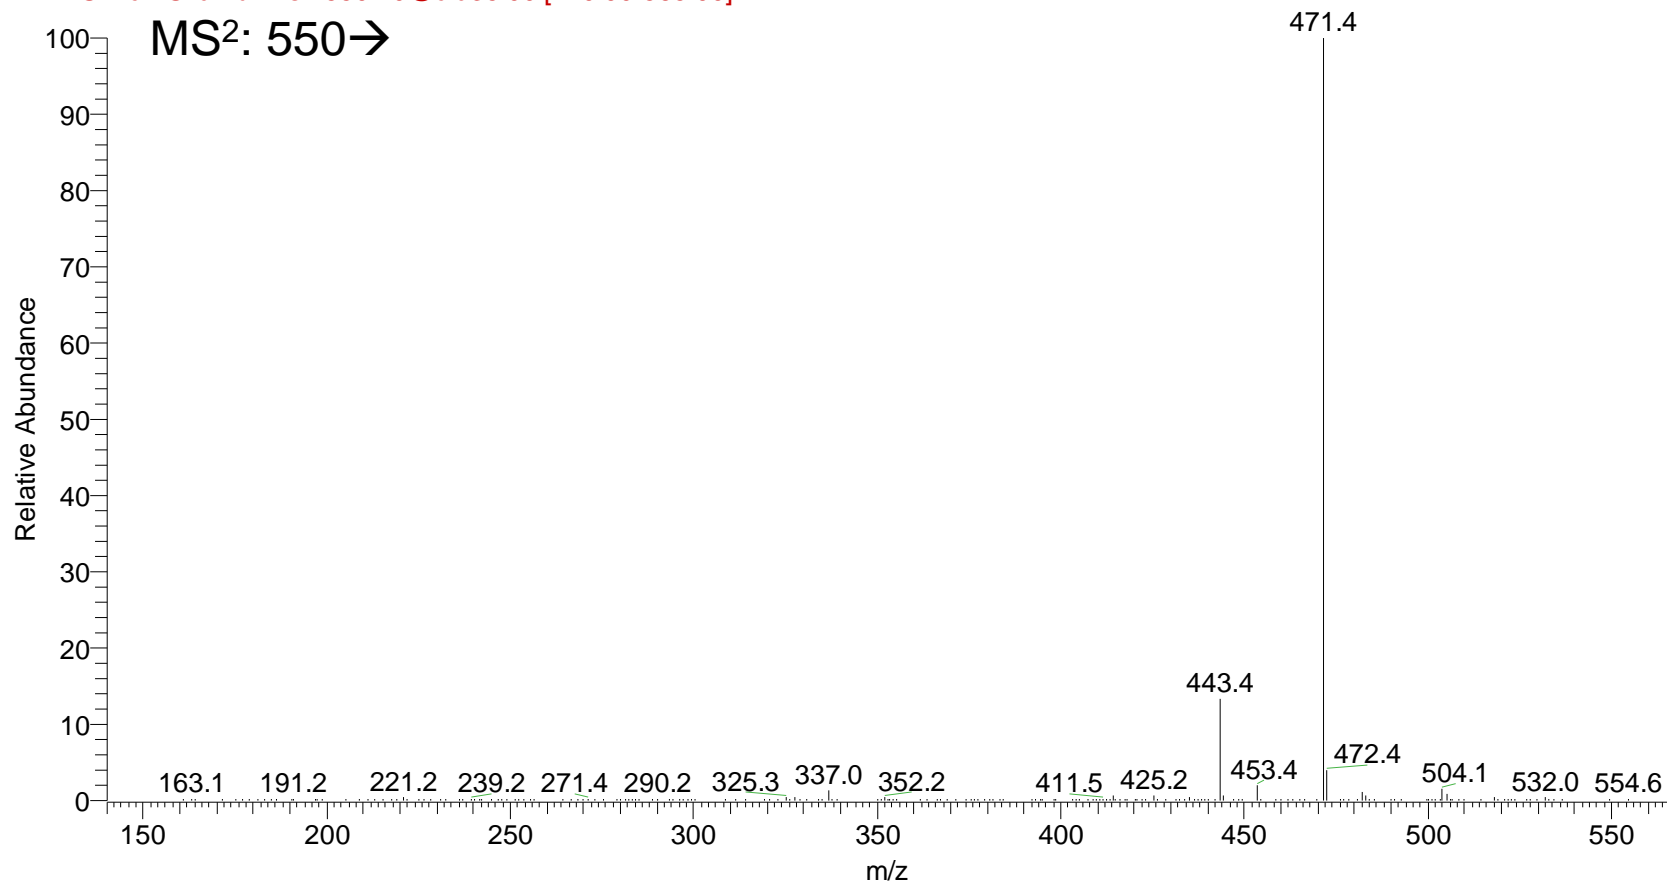

**Fig. S4an**

**C<sup>4</sup>-24,27-diol-3-one 3-GP**

CTX\_UFR2\_FR1\_2

30/06/2006 18:49:40

CTX\_UFR2\_FR1\_2 #590 RT: 4.84 AV: 1 NL: 1.03E3

F: ITMS + c ESI d Full ms3 550.40@cid35.00 471.39@cid35.00 [115.00-485.00]

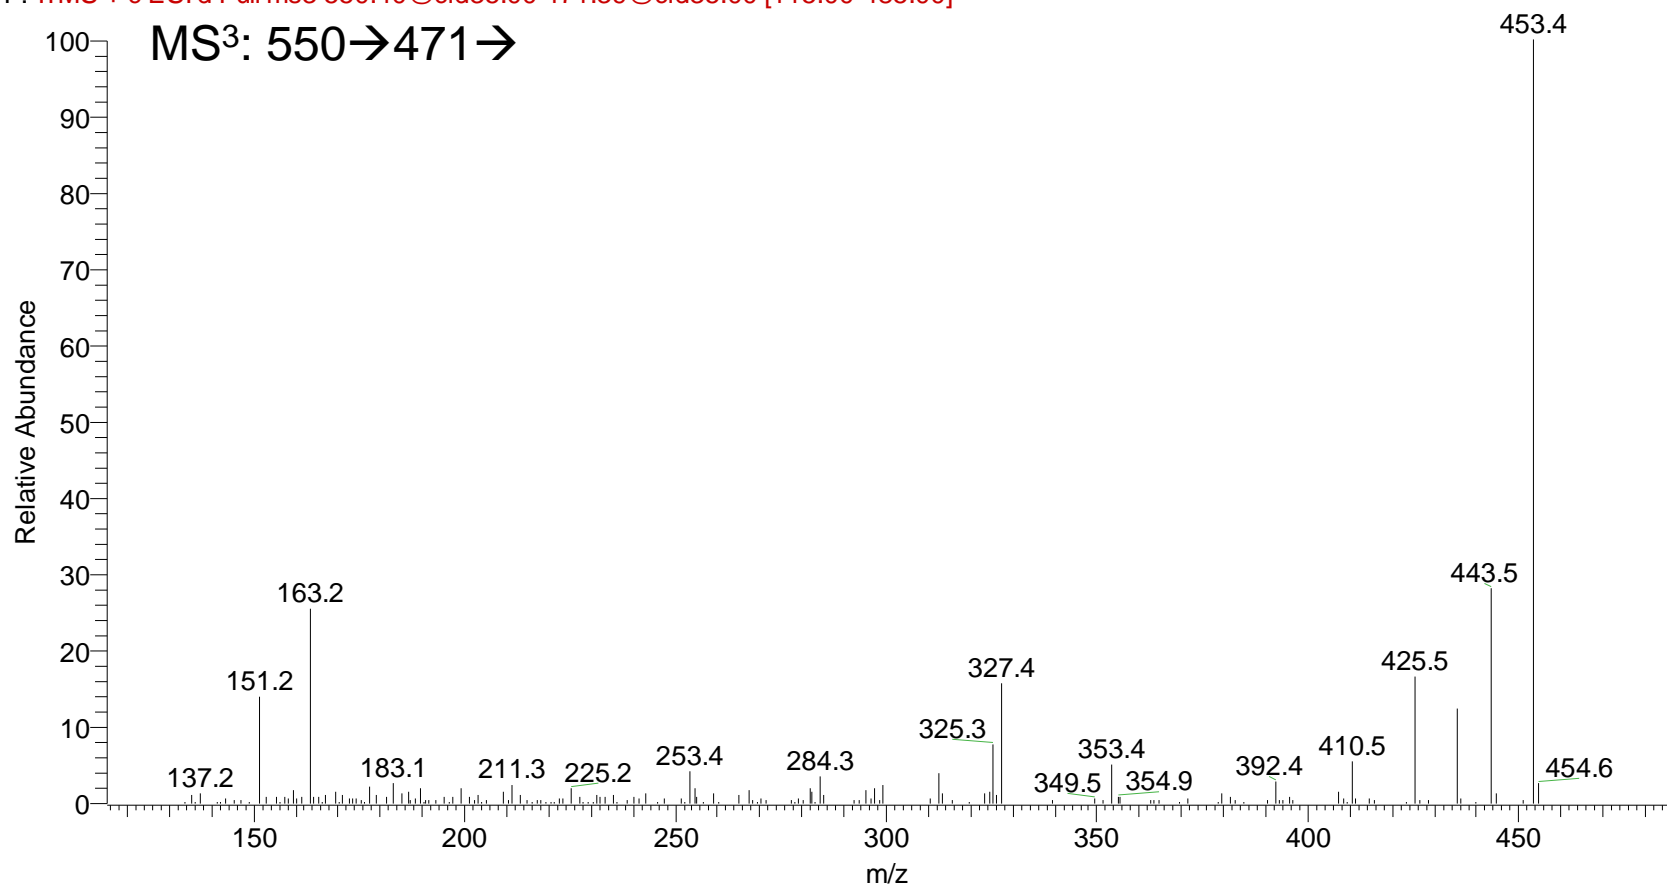

**Fig. S4ao**

C-x-ol-y,z-dione y-GP / C<sup>x</sup>-x,y-diol-z-one z-GP

CTX\_UFR2\_FR1\_2

30/06/2006 18:49:40

CTX\_UFR2\_FR1\_2 #1112 RT: 9.09 AV: 1 NL: 2.98E3  
F: ITMS + c ESI d Full ms2 550.40@cid35.00 [140.00-565.00]

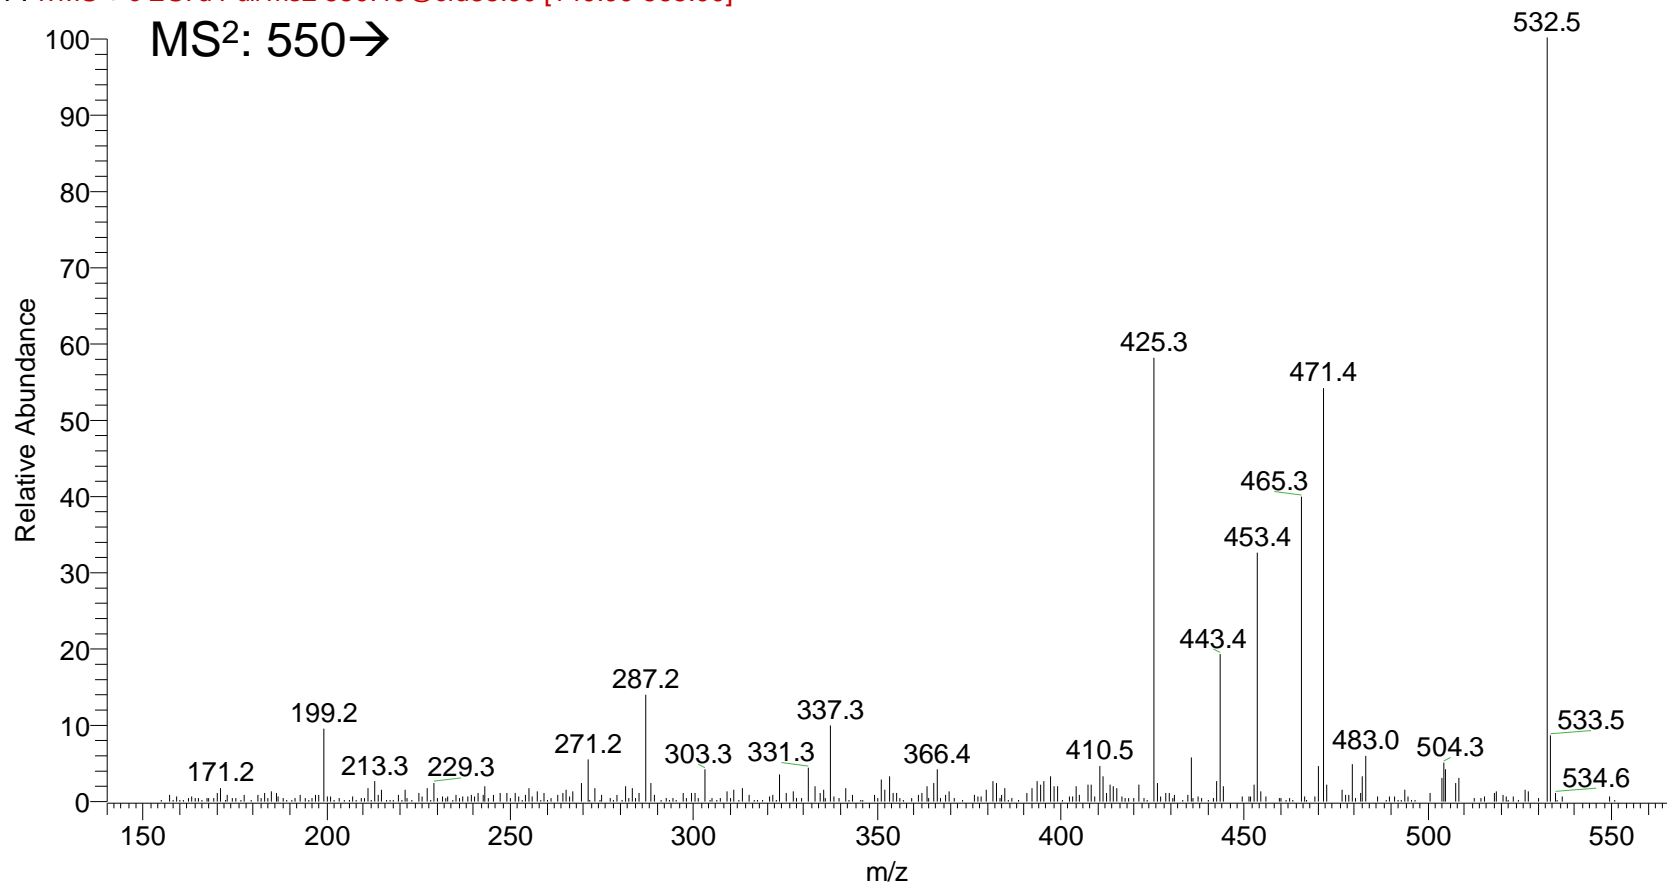

**Fig. S4ap**

C-x-ol-y,z-dione y-GP / C<sup>x</sup>-x,y-diol-z-one z-GP

CTX\_UFR2\_FR1\_2

30/06/2006 18:49:40

CTX\_UFR2\_FR1\_2 #1113 RT: 9.10 AV: 1 NL: 1.33E2

F: ITMS + c ESI d Full ms3 550.40@cid35.00 471.39@cid35.00 [115.00-485.00]

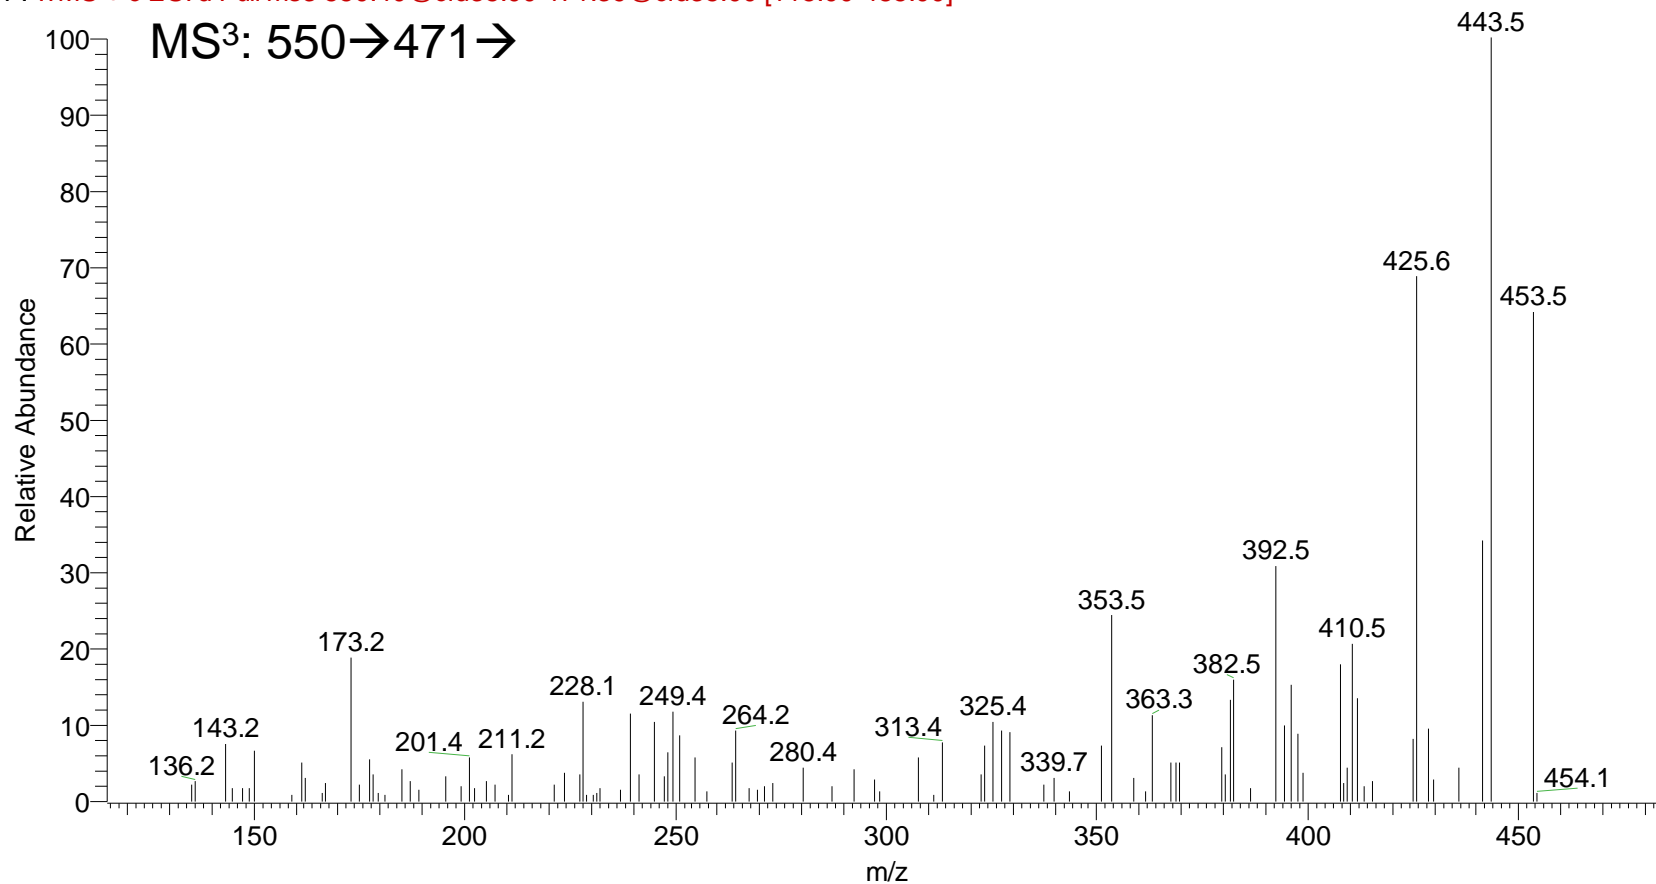

**Fig. S4aq**

C-x,y-diol-z-one z-GP

CTX\_UFR2\_FR1\_2

30/06/2006 18:49:40

CTX\_UFR2\_FR1\_2 #1161 RT: 9.47 AV: 1 NL: 3.58E3  
F: ITMS + c ESI d Full ms2 552.41 @cid35.00 [140.00-565.00]

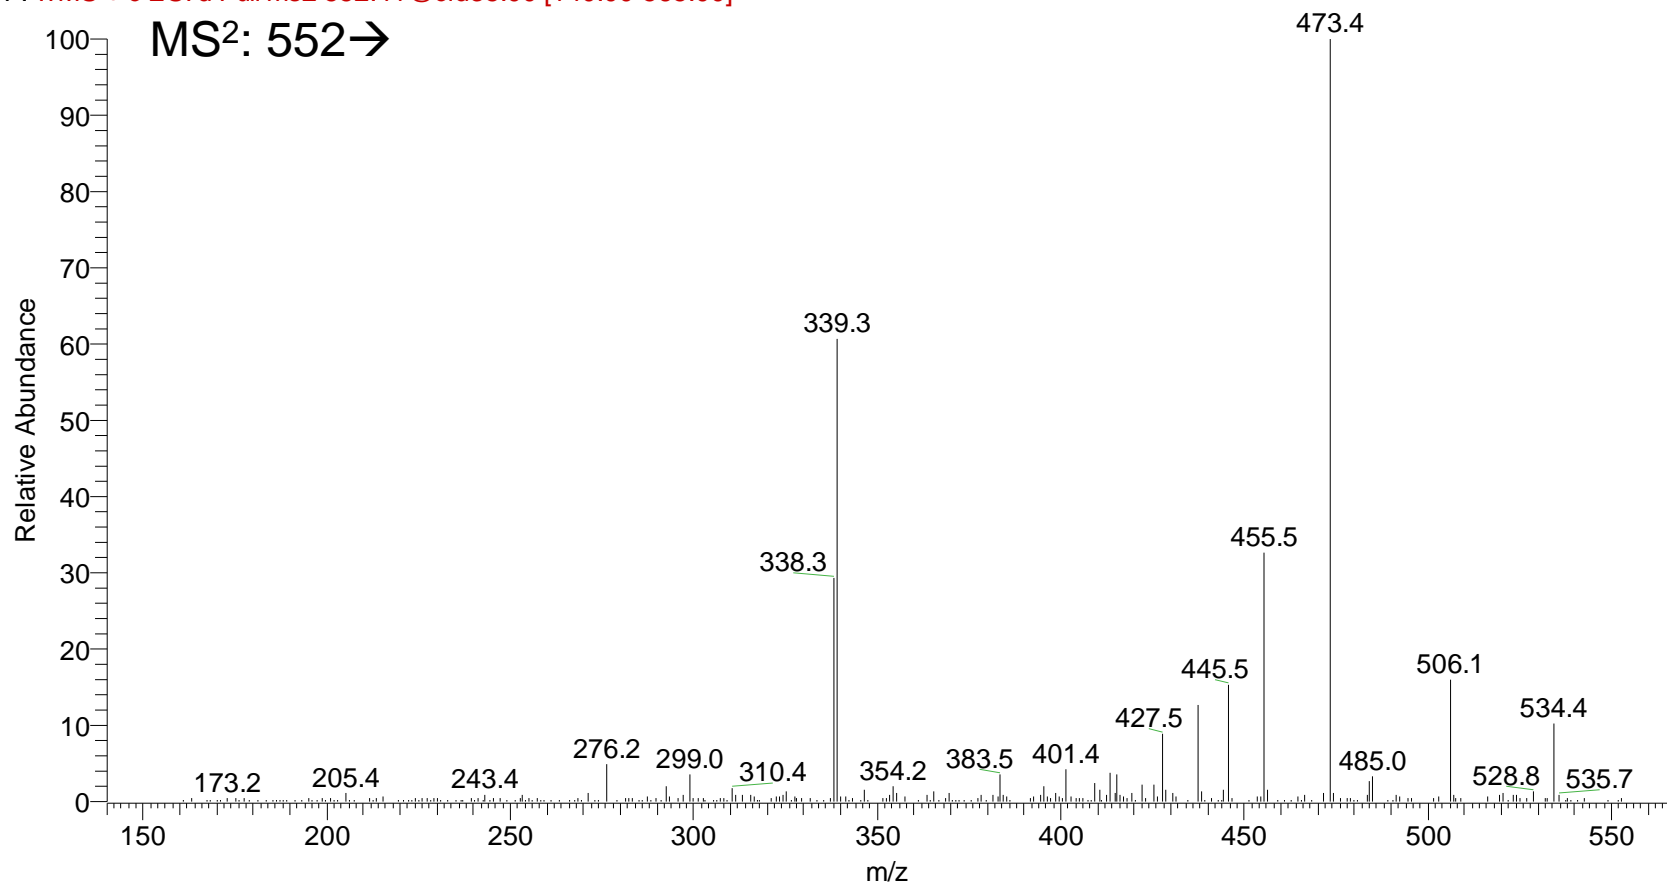



**Fig. S4ar**

C-x,y-diol-z-one z-GP

CTX\_UFR2\_FR1\_2

30/06/2006 18:49:40

CTX\_UFR2\_FR1\_2 #1162 RT: 9.48 AV: 1 NL: 5.63E2

F: ITMS + c ESI d Full ms3 552.41@cid35.00 473.44@cid35.00 [120.00-485.00]

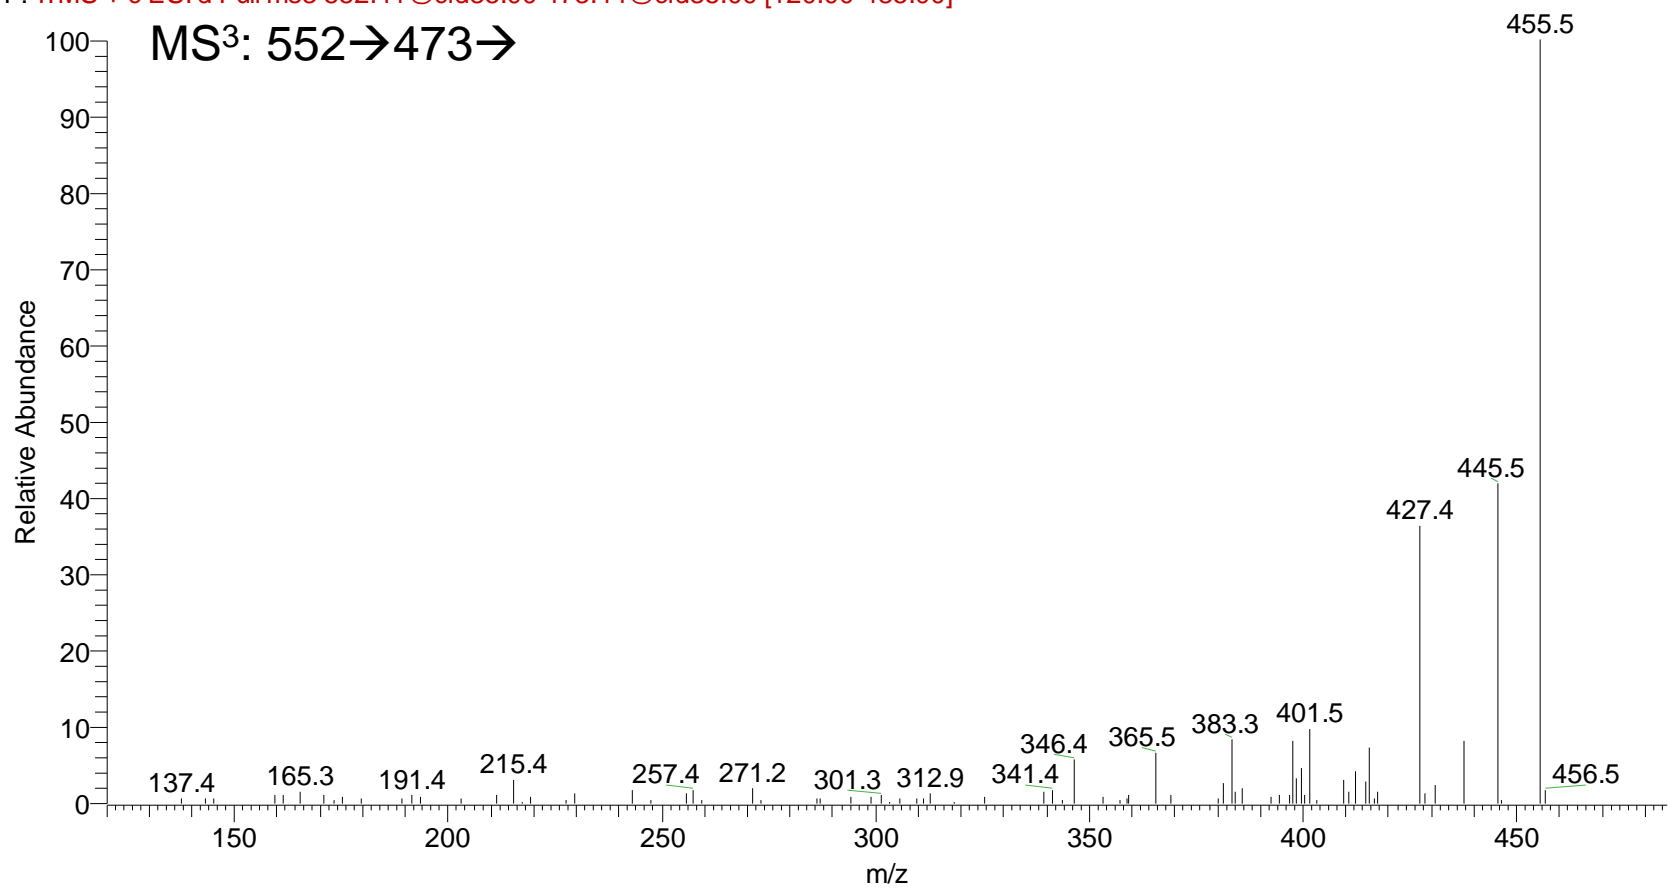

# Fig. S4as

## aldol

CTX\_UFR2\_FR1\_2

30/06/2006 18:49:40

CTX\_UFR2\_FR1\_2 #1181 RT: 9.62 AV: 1 NL: 5.46E3  
F: ITMS + c ESI d Full ms2 552.41@cid35.00 [140.00-565.00]

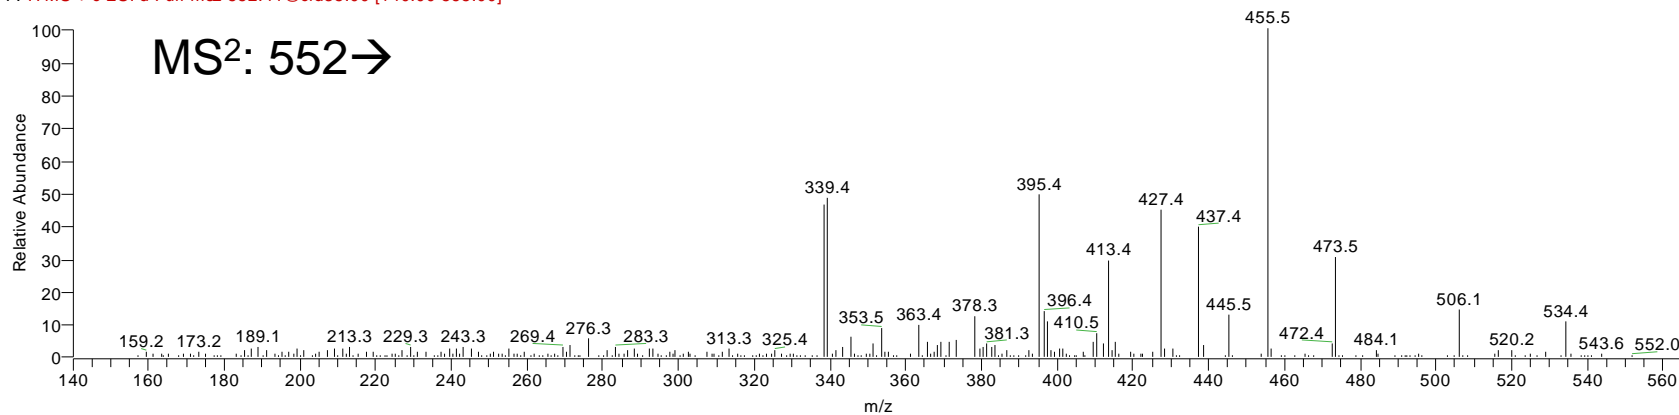

esi\_std28 #1173 RT: 9.94 AV: 1 NL: 1.61E6  
F: ITMS + c ESI d Full ms2 552.41@cid30.00 [140.00-565.00]

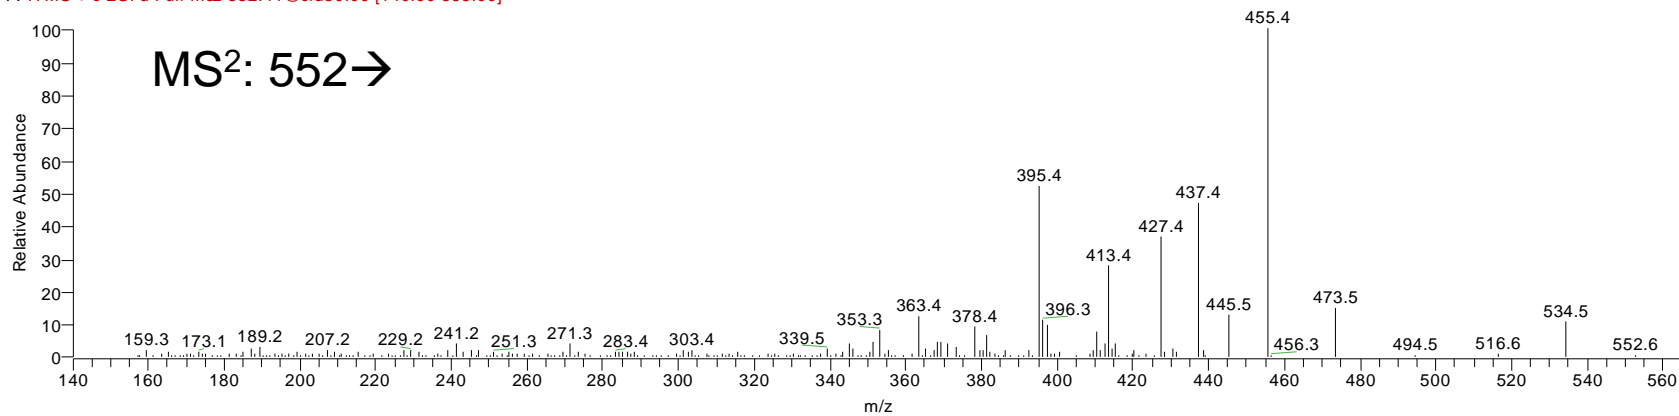

Supplement: NIHMS5168-supplement-Fig_S4.pdf [file NIHMS5168-supplement-Fig_S4.pdf]
