# Supplementary material
Source: PubMed Central journal article supplement (PMC2702751)
Supplement: NIHMS5168-supplement-Fig_S1.pdf [file NIHMS5168-supplement-Fig_S1.pdf]

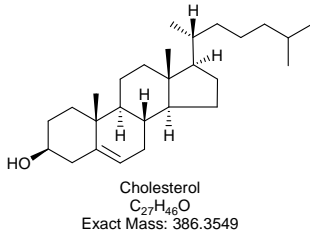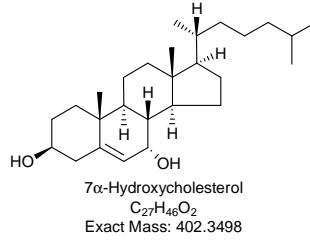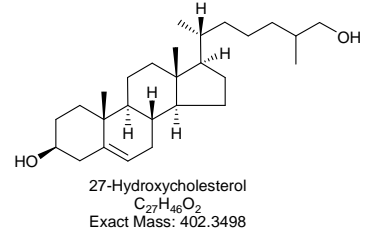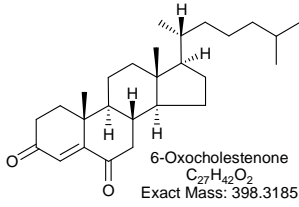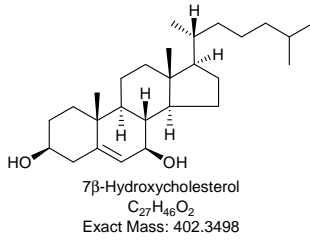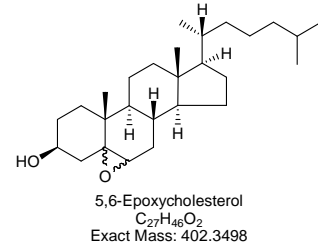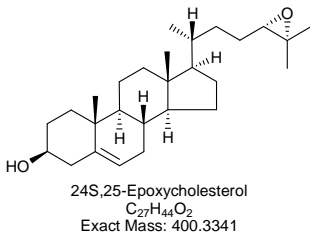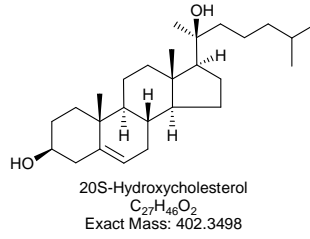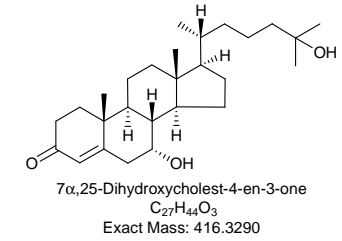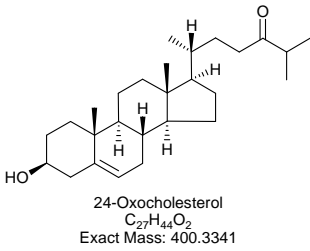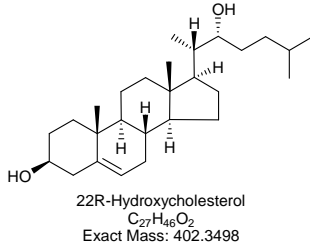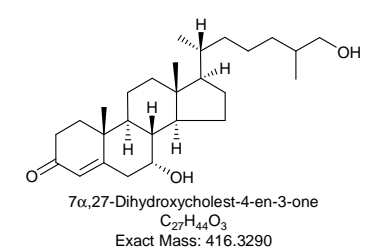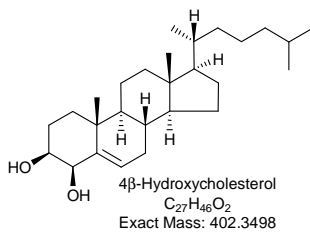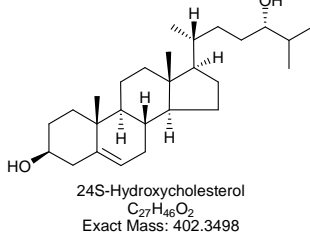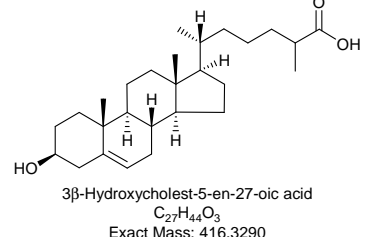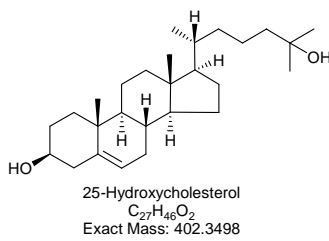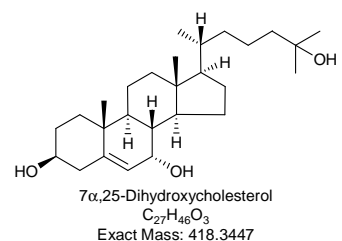

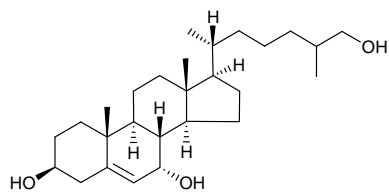

7α,27-Dihydroxycholesterol  
 $C_{27}H_{46}O_3$   
 Exact Mass: 418.3447

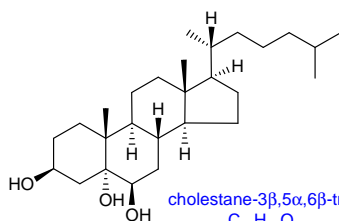

cholestane-3β,5α,6β-triol  
 $C_{27}H_{48}O_3$   
 Exact Mass: 420.3603

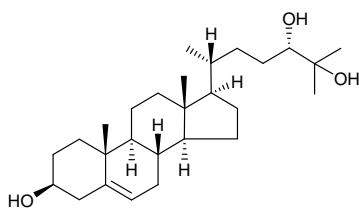

24S,25-Dihydroxycholesterol  
 $C_{27}H_{46}O_3$   
 Exact Mass: 418.3447

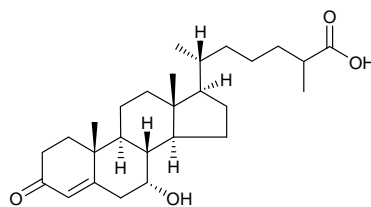

7α-Hydroxy-3-oxocholest-4-en-27-oic acid  
 $C_{27}H_{42}O_4$   
 Exact Mass: 430.3083

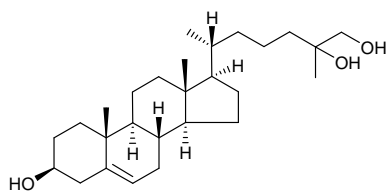

25,27-Dihydroxycholesterol  
 $C_{27}H_{46}O_3$   
 Exact Mass: 418.3447

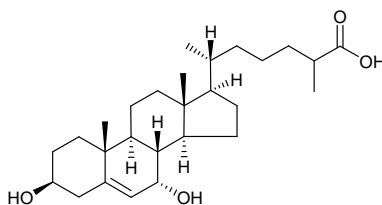

3β,7α-Dihydroxycholest-5-en-27-oic acid  
 $C_{27}H_{44}O_4$   
 Exact Mass: 432.3240

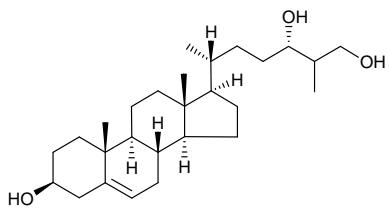

24S,27-Dihydroxycholesterol  
 $C_{27}H_{46}O_3$   
 Exact Mass: 418.3447

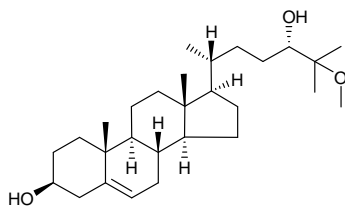

24S-Hydroxy-25-methoxycholesterol  
 $C_{28}H_{48}O_3$   
 Exact Mass: 432.3603

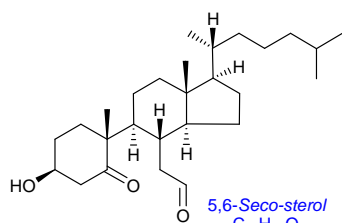

5,6-Seco-sterol  
 $C_{27}H_{46}O_3$   
 Exact Mass: 418.3447

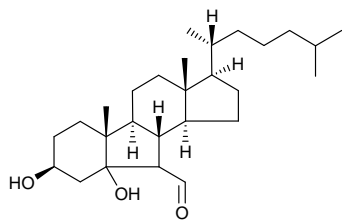

Aldol  
 $C_{27}H_{46}O_3$   
 Exact Mass: 418.3447

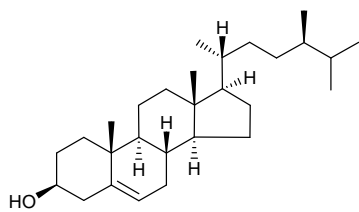

Campesterol  
 $C_{29}H_{48}O$   
Exact Mass: 400.3705

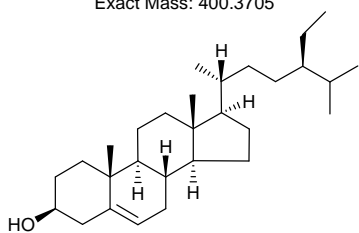

Sitosterol  
 $C_{29}H_{50}O$   
Exact Mass: 414.3862

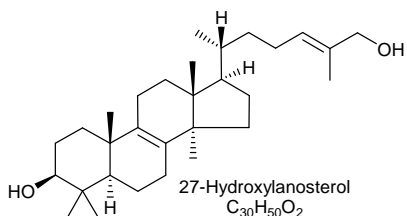

27-Hydroxylanosterol  
 $C_{30}H_{50}O_2$   
Exact Mass: 442.3811
