# Supplementary material
Source: PubMed Central journal article supplement (PMC2702751)

Fig. S2

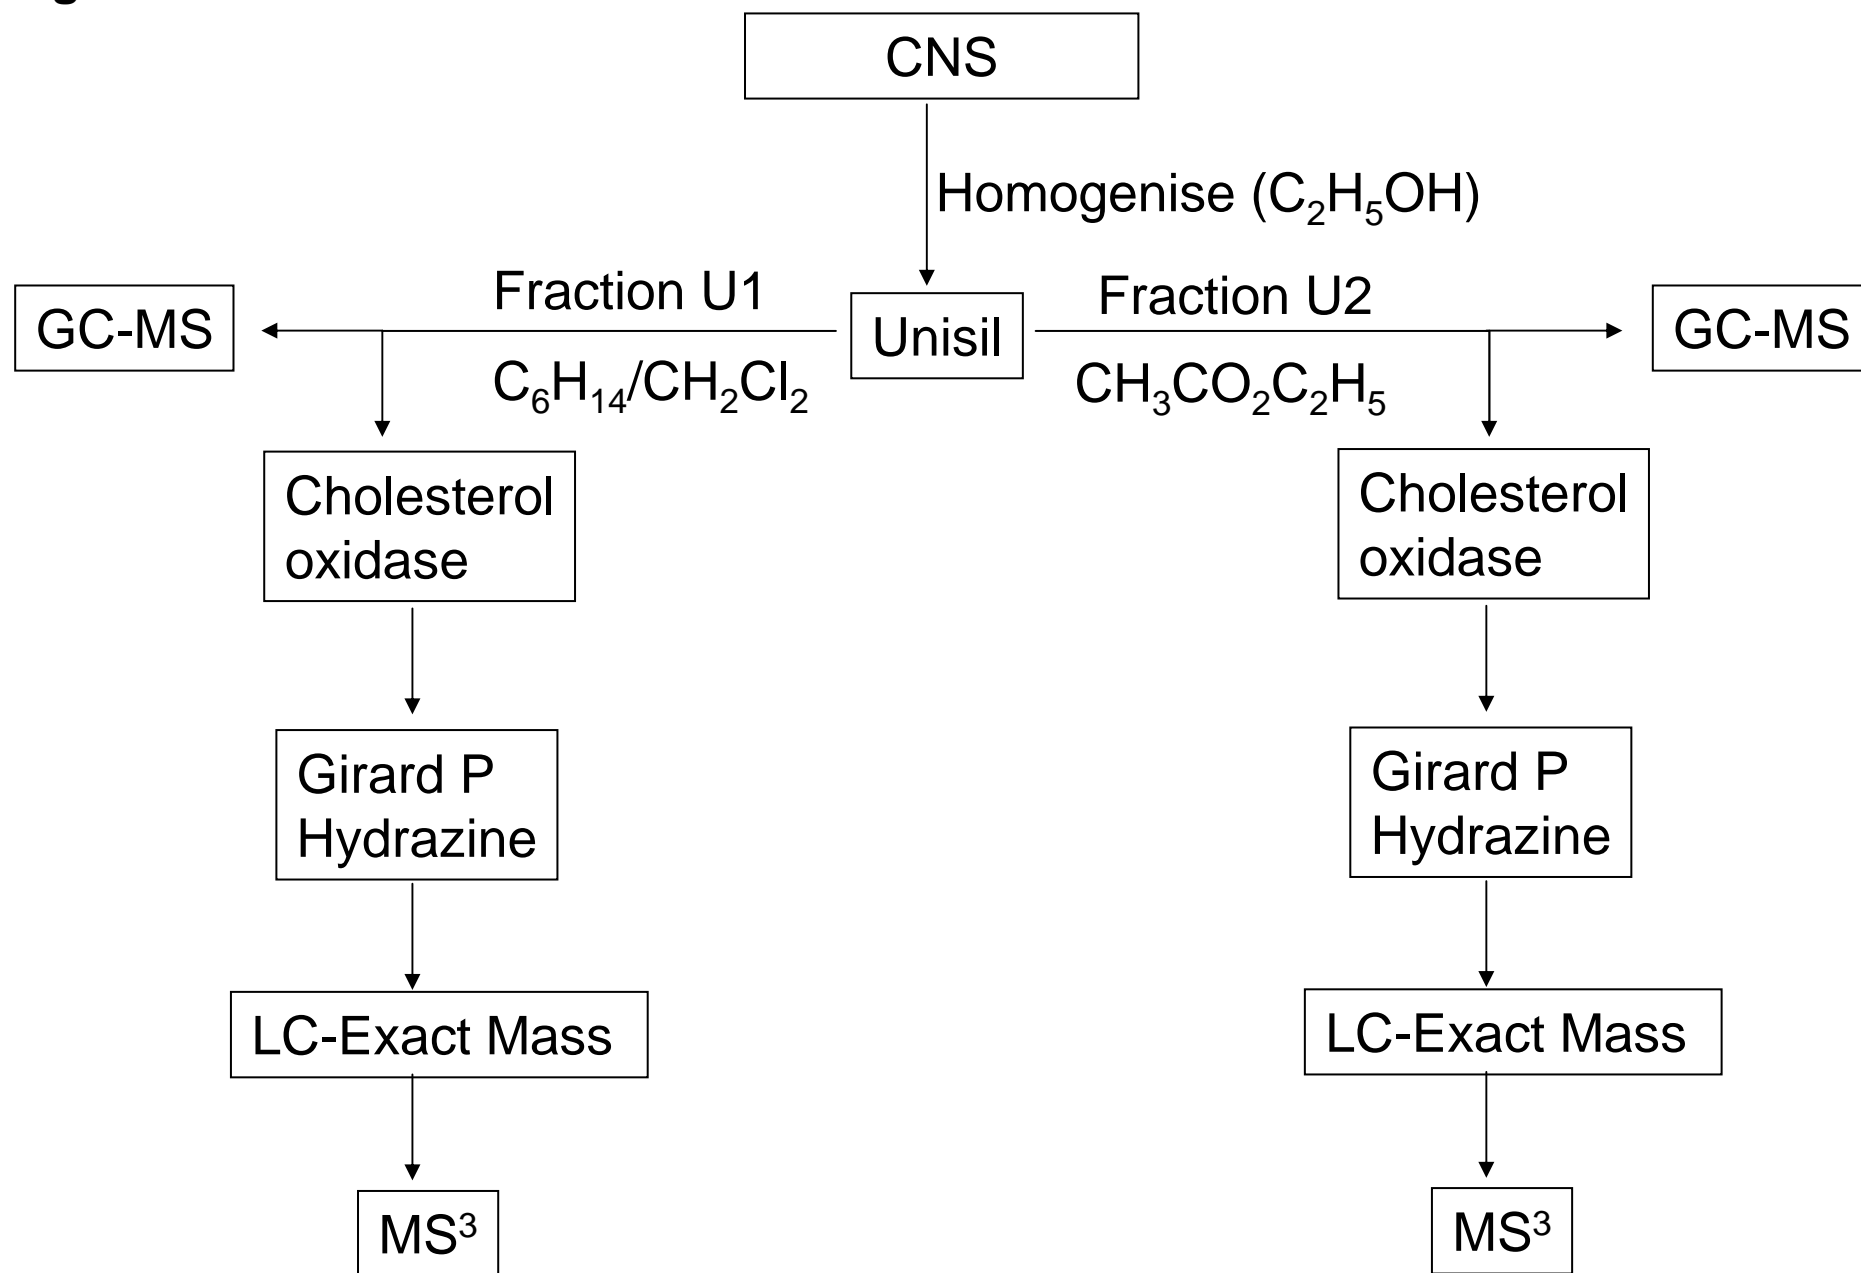

Supplement: NIHMS5168-supplement-Fig_S2.pdf [file NIHMS5168-supplement-Fig_S2.pdf]

Fig. S3a

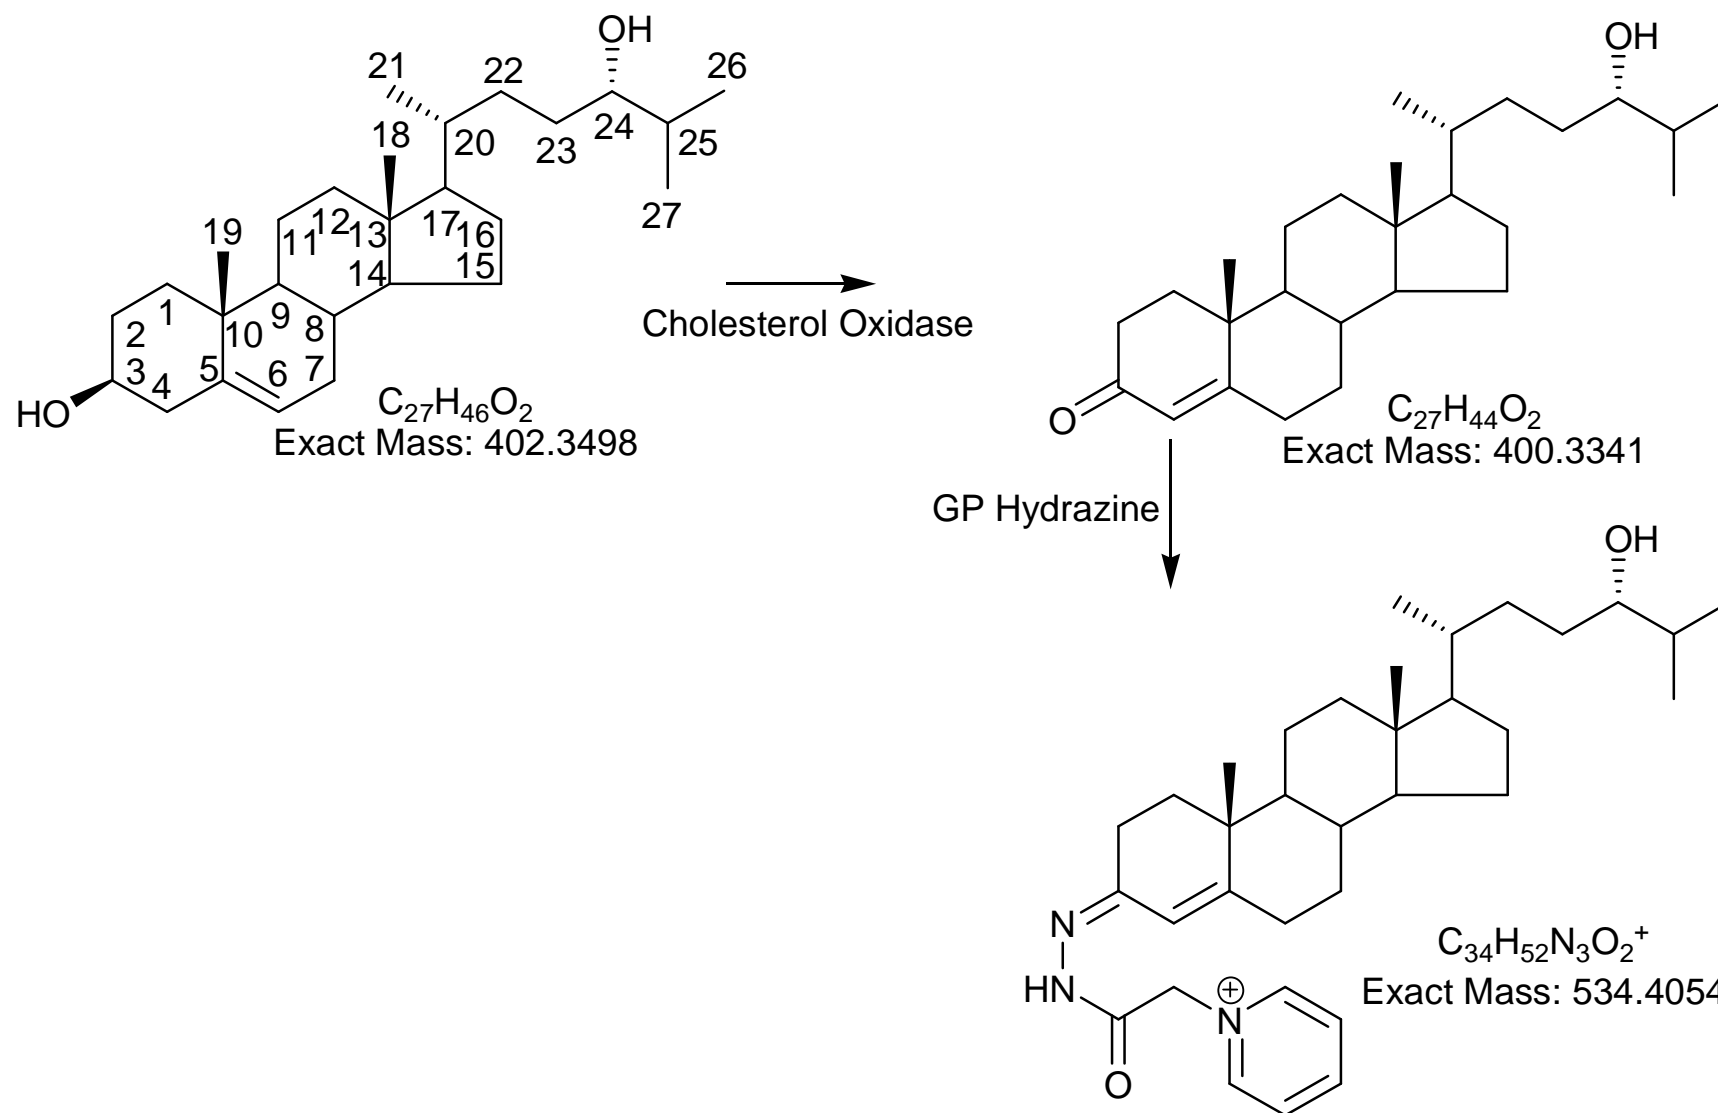

Fig. S3b

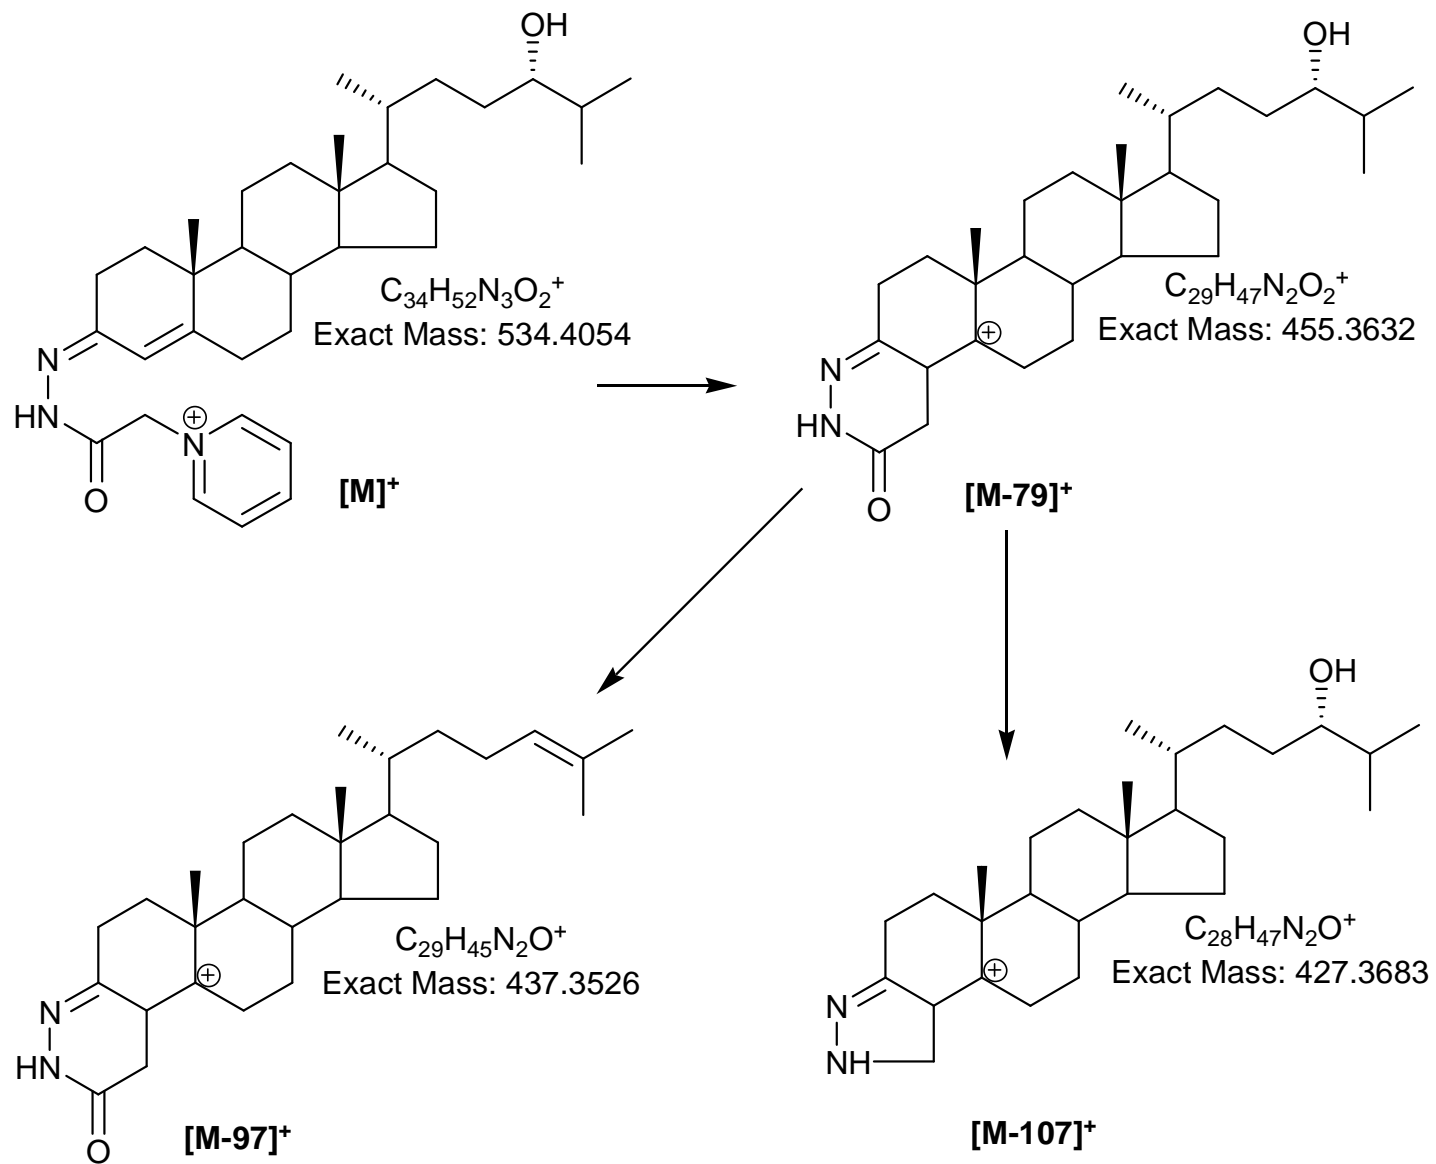

Fig. S3c

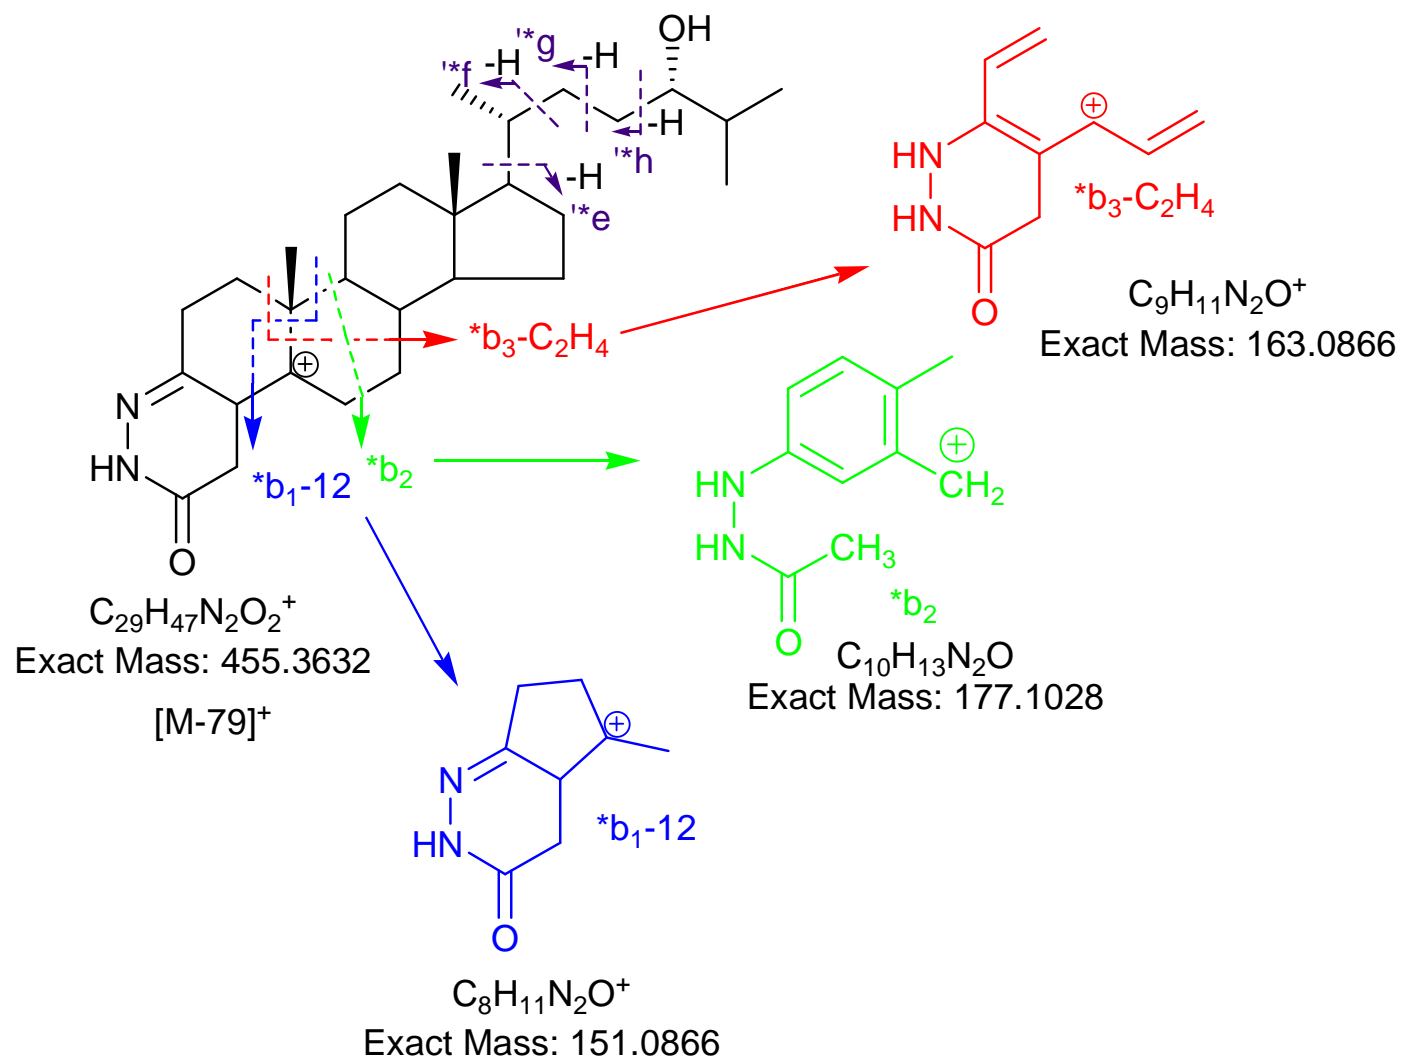

Supplement: NIHMS5168-supplement-Fig_S3.pdf [file NIHMS5168-supplement-Fig_S3.pdf]

Fig. S5

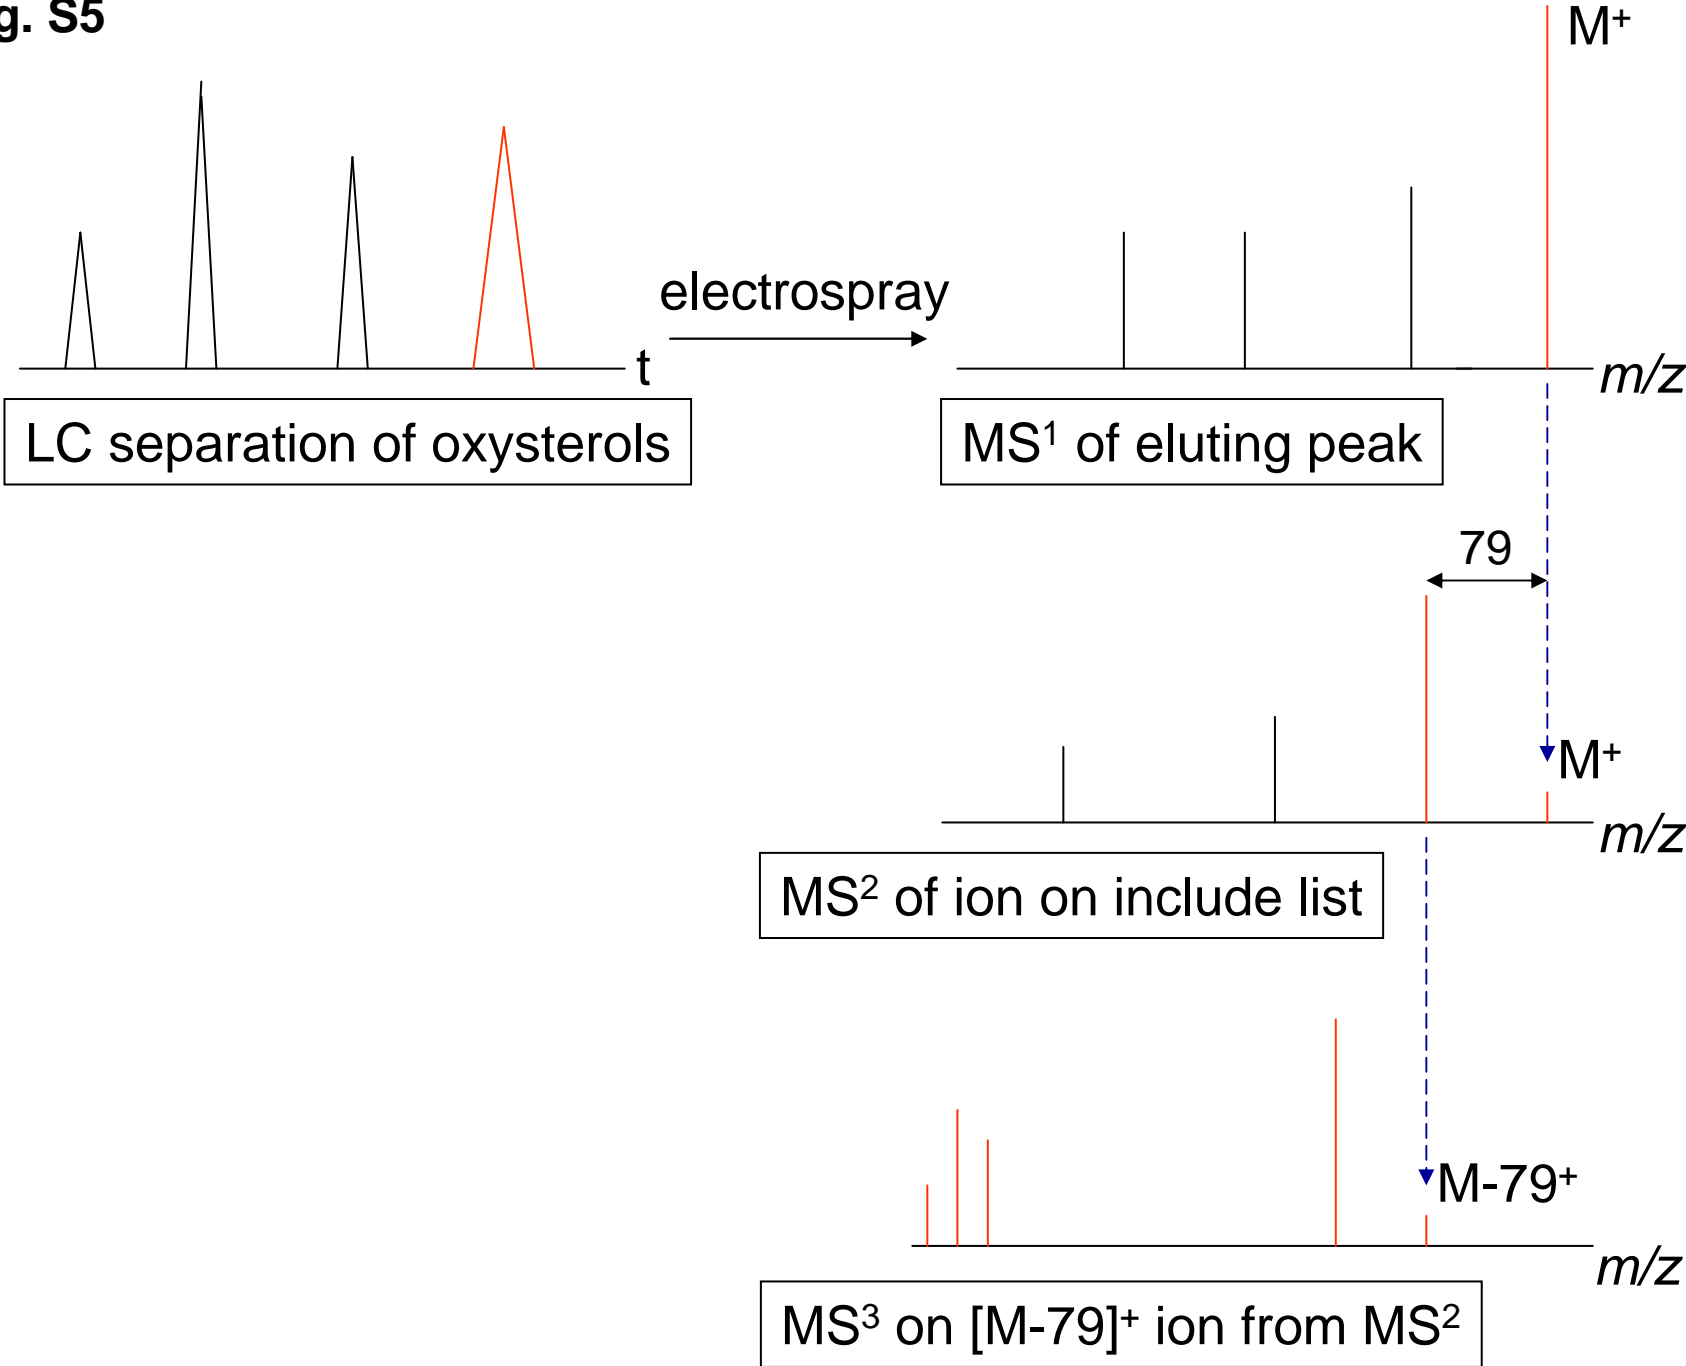

Supplement: NIHMS5168-supplement-Fig_S5.pdf [file NIHMS5168-supplement-Fig_S5.pdf]
